# Supplementary material
Source: PubMed Central journal article supplement (PMC3253737)
Supplement: NIHMS339913-supplement-1_si_001.pdf [file NIHMS339913-supplement-1_si_001.pdf]

**Supporting Information for**

**Cytotoxic Withanolide Constituents from *Physalis longifolia***

Huaping Zhang,<sup>†</sup> Abbas K. Samadi,<sup>‡</sup> Robert J. Gallagher,<sup>†</sup> Juan J. Araya,<sup>†</sup> Xiaoqin Tong,<sup>†</sup> Victor W. Day,<sup>§</sup> Mark S. Cohen,<sup>‡</sup> Kelly Kindscher,<sup>⊥</sup> Rao Gollapudi,<sup>†</sup> and Barbara N. Timmermann<sup>\*†</sup>

<sup>†</sup> *Department of Medicinal Chemistry, School of Pharmacy, University of Kansas, Lawrence, KS 66045, United States*

<sup>‡</sup> *Department of Surgery, School of Medicine, University of Kansas, Medical Center, Kansas City, KS 66160, United States*

<sup>§</sup> *The Small-Molecule X-ray Crystallography Laboratory, University of Kansas, Lawrence, KS 66047, United States*

<sup>⊥</sup> *Kansas Biological Survey, University of Kansas, Lawrence, Kansas 66047, United States*

\* Corresponding Author. Tel: +01-785-864-4844. Fax: +01-785-864-5326. E-mail address: [btimmer@ku.edu](mailto:btimmer@ku.edu) (B. N. T.)

## Table of Contents

**S0** Withanolides **1-21** isolated from *Physalis longifolia*

**S1(a)**  $^1\text{H}$  NMR spectrum of withalongolide A (**1**) in  $\text{C}_5\text{D}_5\text{N}$  (500 MHz)

**S1(b)**  $^{13}\text{C}$  APT spectrum of withalongolide A (**1**) (125 MHz)

**S1(c)**  $^1\text{H}$ - $^1\text{H}$  COSY spectrum of withalongolide A (**1**)

**S1(d)** HSQC spectrum of withalongolide A (**1**)

**S1(e)** HMBC spectrum of withalongolide A (**1**)

**S1(f)** ROESY spectrum of withalongolide A (**1**)

**S1(g)**  $^1\text{H}$  NMR spectrum of withalongolide A (**1**) in  $\text{CDCl}_3$  and  $\text{CD}_3\text{OD}$  (500 MHz)

**S1(h)**  $^{13}\text{C}$  APT spectrum of withalongolide A (**1**) (125 MHz)

**S1(i)**  $^1\text{H}$ - $^1\text{H}$  COSY spectrum of withalongolide A (**1**)

**S1(j)** HSQC spectrum of withalongolide A (**1**)

**S1(k)** HMBC spectrum of withalongolide A (**1**)

**S1(l)** ROESY spectrum of withalongolide A (**1**)

**S1a(a)**  $^1\text{H}$  NMR spectrum of withalongolide A 4, 19,27-triacetae (**1a**) in  $\text{CDCl}_3$  (500 MHz)

**S1a(b)**  $^{13}\text{C}$  APT spectrum of withalongolide A 4, 19,27-triacetae (**1a**) (125 MHz)

**S1a(c)**  $^1\text{H}$ - $^1\text{H}$  COSY spectrum of withalongolide A 4, 19,27-triacetae (**1a**)

**S1a(d)** HSQC spectrum of withalongolide A 4, 19,27-triacetae (**1a**)

**S1a(e)** HMBC spectrum of withalongolide A 4, 19,27-triacetae (**1a**)

**S1a(f)** ROESY spectrum of withalongolide A 4, 19,27-triacetae (**1a**)

**S1b(a)**  $^1\text{H}$  NMR spectrum of withalongolide A 4,27-diacetae (**1b**) in  $\text{CDCl}_3$  (500 MHz)

**S1b(b)**  $^{13}\text{C}$  APT spectrum of withalongolide A 4,27-diacetae (**1b**) (125 MHz)

**S1b(c)**  $^1\text{H}$ - $^1\text{H}$  COSY spectrum of withalongolide A 4,27-diacetae (**1b**)

**S1b(d)** HSQC spectrum of withalongolide A 4,27-diacetae (**1b**)

**S1b(e)** HMBC spectrum of withalongolide A 4,27-diacetae (**1b**)

**S2(a)**  $^1\text{H}$  NMR spectrum of withalongolide B (**2**) in  $\text{CHCl}_3$  (400 MHz)

**S2(b)**  $^{13}\text{C}$  APT spectrum of withalongolide B (**2**) (125 MHz)

**S2(c)**  $^1\text{H}$ - $^1\text{H}$  COSY spectrum of withalongolide B (**2**)

**S2(d)** HSQC spectrum of withalongolide B (**2**)

**S2(e)** HMBC spectrum of withalongolide B (**2**)

**S2(f)** ROESY spectrum of withalongolide B (**2**)

**S2a(a)**  $^1\text{H}$  NMR spectrum of withalongolide B 4,19-diacetate(**2a**) in  $\text{CDCl}_3$  (500 MHz)

**S2a(b)**  $^{13}\text{C}$  APT spectrum of withalongolide B 4,19-diacetate(**2a**) (125 MHz)

**S2a(c)**  $^1\text{H}$ - $^1\text{H}$  COSY spectrum of withalongolide B 4,19-diacetate(**2a**)

**S2a(d)** HSQC spectrum of withalongolide B 4,19-diacetate(**2a**)

**S2a(e)** HMBC spectrum of withalongolide B 4,19-diacetate(**2a**)

**S2b(a)**  $^1\text{H}$  NMR spectrum of withalongolide B 4-acetate (**2b**) in  $\text{CDCl}_3$  (500 MHz)

**S2b(b)**  $^{13}\text{C}$  APT spectrum of withalongolide B 4-acetate (**2b**) (125 MHz)

**S2b(c)**  $^1\text{H}$ - $^1\text{H}$  COSY spectrum of withalongolide B 4-acetate (**2b**)

**S2b(d)** HSQC spectrum of withalongolide B 4-acetate (**2b**)

**S2b(e)** HMBC spectrum of withalongolide B 4-acetate (**2b**)

**S3(a)**  $^1\text{H}$  NMR spectrum of withalongolide C (**3**) in  $\text{CDCl}_3$  (400 MHz)

**S3(b)**  $^{13}\text{C}$  APT spectrum of withalongolide C (**3**) (125 MHz)

**S3(c)**  $^1\text{H}$ - $^1\text{H}$  COSY spectrum of withalongolide C (**3**)

**S3(d)** HSQC spectrum of withalongolide C (**3**)

**S3(e)** HMBC spectrum of withalongolide C (**3**)

**S3(f)** NOESY spectrum of withalongolide C (**3**)

**S4(a)**  $^1\text{H}$  NMR spectrum of withalongolide D (**4**) in  $\text{CDCl}_3$  (400 MHz)

**S4(b)**  $^{13}\text{C}$  APT spectrum of withalongolide D (**4**) (125 MHz)

**S4(c)**  $^1\text{H}$ - $^1\text{H}$  COSY spectrum of withalongolide D (**4**)

**S4(d)** HSQC spectrum of withalongolide D (**4**)

**S4(e)** HMBC spectrum of withalongolide D (**4**)

**S4(f)** NOESY spectrum of withalongolide D (**4**)

**S5(a)**  $^1\text{H}$  NMR spectrum of withalongolide E (**5**) in  $\text{CDCl}_3$  (500 MHz)

**S5(b)**  $^{13}\text{C}$  APT spectrum of withalongolide E (**5**) (125 MHz)  
**S5(c)**  $^1\text{H}$ - $^1\text{H}$  COSY spectrum of withalongolide E (**5**)  
**S5(d)** HSQC spectrum of withalongolide E (**5**)  
**S5(e)** HMBC spectrum of withalongolide E (**5**)  
**S5(f)** NOESY spectrum of withalongolide E (**5**)  
**S6(a)**  $^1\text{H}$  NMR spectrum of withalongolide F (**6**) in  $\text{CDCl}_3$  (400 MHz)  
**S6(b)**  $^{13}\text{C}$  APT spectrum of withalongolide F (**6**) (125 MHz)  
**S6(c)** DQF-COSY spectrum of withalongolide F (**6**)  
**S6(d)** HSQC spectrum of withalongolide F (**6**)  
**S6(e)** HMBC spectrum of withalongolide F (**6**)  
**S6(f)** NOESY spectrum of withalongolide F (**6**)  
**S7(a)**  $^1\text{H}$  NMR spectrum of withalongolide G (**7**) in  $\text{C}_5\text{D}_5\text{N}$  (500 MHz)  
**S7(b)**  $^{13}\text{C}$  APT spectrum of withalongolide G (**7**) (125 MHz)  
**S7(c)**  $^1\text{H}$ - $^1\text{H}$  COSY spectrum of withalongolide G (**7**)  
**S7(d)** HSQC spectrum of withalongolide G (**7**)  
**S7(e)** HMBC spectrum of withalongolide G (**7**)  
**S7(f)** NOESY spectrum of withalongolide G (**7**)  
**S8(a)**  $^1\text{H}$  NMR spectrum of withalongolide H (**8**) in  $\text{C}_5\text{D}_5\text{N}$  (500 MHz)  
**S8(b)**  $^{13}\text{C}$  APT spectrum of withalongolide H (**8**) (125 MHz)  
**S8(c)**  $^1\text{H}$ - $^1\text{H}$  COSY spectrum of withalongolide H (**8**)  
**S8(d)** HSQC spectrum of withalongolide H (**8**)  
**S8(e)** HMBC spectrum of withalongolide H (**8**)  
**S8(f)** NOESY spectrum of withalongolide H (**8**)  
**S9(a)**  $^1\text{H}$  NMR spectrum of withalongolide I (**9**) in  $\text{C}_5\text{D}_5\text{N}$  (500 MHz)  
**S9(b)**  $^{13}\text{C}$  APT spectrum of withalongolide I (**9**) (125 MHz)  
**S9(c)**  $^1\text{H}$ - $^1\text{H}$  COSY spectrum of withalongolide I (**9**)  
**S9(d)** HSQC spectrum of withalongolide I (**9**)

**S9(e)** HMBC spectrum of withalongolide I (**9**)

**S9(f)** NOESY spectrum of withalongolide I (**9**)

**S10(a)**  $^1\text{H}$  NMR spectrum of withalongolide J (**10**) in  $\text{C}_5\text{D}_5\text{N}$  (500 MHz)

**S10(b)**  $^{13}\text{C}$  APT spectrum of withalongolide J (**10**) (125 MHz)

**S10(c)**  $^1\text{H}$ - $^1\text{H}$  COSY spectrum of withalongolide J (**10**)

**S10(d)** HSQC spectrum of withalongolide J (**10**)

**S10(e)** HMBC spectrum of withalongolide J (**10**)

**S10(f)** NOESY spectrum of withalongolide J (**10**)

**S11(a)**  $^1\text{H}$  NMR spectrum of withalongolide K (**11**) in  $\text{C}_5\text{D}_5\text{N}$  (500 MHz)

**S11(b)**  $^{13}\text{C}$  APT spectrum of withalongolide K (**11**) (125 MHz)

**S11(c)**  $^1\text{H}$ - $^1\text{H}$  COSY spectrum of withalongolide K (**11**)

**S11(d)** HSQC spectrum of withalongolide K (**11**)

**S11(e)** HMBC spectrum of withalongolide K (**11**)

**S11(f)** NOESY spectrum of withalongolide K (**11**)

**S12(a)**  $^1\text{H}$  NMR spectrum of withalongolide L (**12**) in  $\text{C}_5\text{D}_5\text{N}$  (500 MHz)

**S12(b)**  $^{13}\text{C}$  APT spectrum of withalongolide L (**12**) (125 MHz)

**S12(c)**  $^1\text{H}$ - $^1\text{H}$  COSY spectrum of withalongolide L (**12**)

**S12(d)** HSQC spectrum of withalongolide L (**12**)

**S12(e)** HMBC spectrum of withalongolide L (**12**)

**S12(f)** NOESY spectrum of withalongolide L (**12**)

**S13(a)**  $^1\text{H}$  NMR spectrum of withalongolide M (**13**) in  $\text{C}_5\text{D}_5\text{N}$  (500 MHz)

**S13(b)**  $^{13}\text{C}$  APT spectrum of withalongolide M (**13**) (125 MHz)

**S13(c)**  $^1\text{H}$ - $^1\text{H}$  COSY spectrum of withalongolide M (**13**)

**S13(d)** HSQC spectrum of withalongolide M (**13**)

**S13(e)** HMBC spectrum of withalongolide M (**13**)

**S13(f)** NOESY spectrum of withalongolide M (**13**)

**S14(a)**  $^1\text{H}$  NMR spectrum of withalongolide N (**14**) in  $\text{C}_5\text{D}_5\text{N}$  (500 MHz)

**S14(b)**  $^{13}\text{C}$  APT spectrum of withalongolide N (**14**) (125 MHz)

**S14(c)**  $^1\text{H}$ - $^1\text{H}$  COSY spectrum of withalongolide N (**14**)

**S14(d)** HSQC spectrum of withalongolide N (**14**)

**S14(e)** HMBC spectrum of withalongolide N (**14**)

**S14(f)** NOESY spectrum of withalongolide N (**14**)

**S15(a)**  $^1\text{H}$  NMR spectrum of sitoindoside IX (**15**) in  $\text{C}_5\text{D}_5\text{N}$  (500 MHz)

**S15(b)**  $^{13}\text{C}$  APT spectrum of sitoindoside IX (**15**) (125 MHz)

**S15(c)**  $^1\text{H}$ - $^1\text{H}$  COSY spectrum of sitoindoside IX (**15**)

**S15(d)** HSQC spectrum of sitoindoside IX (**15**)

**S15(e)** HMBC spectrum of sitoindoside IX (**15**)

**S15(f)** NOESY spectrum of sitoindoside IX (**15**)

**S16(a)**  $^1\text{H}$  NMR spectrum of withaferin A (**16**) in  $\text{CDCl}_3$  (500 MHz)

**S16(b)**  $^{13}\text{C}$  and DEPT135 spectra of withaferin A (**16**) (125 MHz)

**S17(a)**  $^1\text{H}$  NMR spectrum of 2,3-dihydro-3 $\beta$ -methoxywithaferin A (**17**) in  $\text{CDCl}_3$  (500 MHz)

**S17(b)**  $^{13}\text{C}$  and DEPT135 spectra of 2,3-dihydro-3 $\beta$ -methoxywithaferin A (**17**) (125 MHz)

**S17(c)**  $^1\text{H}$ - $^1\text{H}$  COSY spectrum of 2,3-dihydro-3 $\beta$ -methoxywithaferin A (**17**)

**S17(d)** HSQC spectrum of 2,3-dihydro-3 $\beta$ -methoxywithaferin A (**17**)

**S17(e)** HMBC spectrum of 2,3-dihydro-3 $\beta$ -methoxywithaferin A (**17**)

**S17(f)** NOESY spectrum of 2,3-dihydro-3 $\beta$ -methoxywithaferin A (**17**)

**S18(a)**  $^1\text{H}$  NMR spectrum of viscosalactone B (**18**) in  $\text{C}_5\text{D}_5\text{N}$  (500 MHz)

**S18(b)**  $^{13}\text{C}$  APT spectrum of viscosalactone B (**18**) (125 MHz)

**S18(c)**  $^1\text{H}$ - $^1\text{H}$  COSY spectrum of viscosalactone B (**18**)

**S18(d)** HSQC spectrum of viscosalactone B (**18**)

**S18(e)** HMBC spectrum of viscosalactone B (**18**)

**S18(f)** NOESY spectrum of viscosalactone B (**18**)

**S19(a)**  $^1\text{H}$  NMR spectrum of 2,3-dihydro-3 $\beta$ -O-sulfate withaferin A (**19**) in  $\text{C}_5\text{D}_5\text{N}$  (500 MHz)

**S19(b)**  $^{13}\text{C}$  APT spectrum of 2,3-dihydro-3 $\beta$ -O-sulfate withaferin A (**19**) (125 MHz)

- S19(c)**  $^1\text{H}$ - $^1\text{H}$  COSY spectrum of 2,3-dihydro-3 $\beta$ -O-sulfate withaferin A (**19**)
- S19(d)** HSQC spectrum of 2,3-dihydro-3 $\beta$ -O-sulfate withaferin A (**19**)
- S19(e)** HMBC spectrum of 2,3-dihydro-3 $\beta$ -O-sulfate withaferin A (**19**)
- S19(f)** NOESY spectrum of 2,3-dihydro-3 $\beta$ -O-sulfate withaferin A (**19**)
- S20**  $^1\text{H}$  NMR spectrum of 2,3-dihydrowithaferin A (**20**) in  $\text{CDCl}_3$  (400 MHz)
- S21(a)**  $^1\text{H}$  NMR spectrum of **21** in  $\text{C}_5\text{D}_5\text{N}$  (500 MHz)
- S21(b)**  $^{13}\text{C}$  APT spectrum of **21** (125 MHz)
- S21(c)**  $^1\text{H}$ - $^1\text{H}$  COSY spectrum of **21**
- S21(d)** HSQC spectrum of **21**
- S21(e)** HMBC spectrum of **21**
- S21(f)** NOESY spectrum of **21**
- S22** Cytotoxicity  $\text{IC}_{50}$  of Fractions ( $\mu\text{g/mL}$ ) against Five Cell Lines <sup>a</sup>

**S0** Withanolides **1-21** isolated from *Physalis longifolia*

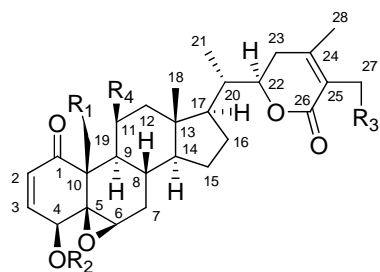

- 1** R<sub>1</sub> = R<sub>3</sub> = OH R<sub>2</sub> = R<sub>4</sub> = H  
**1a** R<sub>1</sub> = OH R<sub>2</sub> = Ac R<sub>3</sub> = OAc R<sub>4</sub> = H  
**1b** R<sub>1</sub> = R<sub>3</sub> = OAc R<sub>2</sub> = Ac R<sub>4</sub> = H  
**2** R<sub>1</sub> = OH R<sub>2</sub> = R<sub>3</sub> = R<sub>4</sub> = H  
**2a** R<sub>1</sub> = OAc R<sub>2</sub> = R<sub>3</sub> = R<sub>4</sub> = H  
**2b** R<sub>1</sub> = OAc R<sub>2</sub> = Ac R<sub>3</sub> = R<sub>4</sub> = H  
**3** R<sub>1</sub> = R<sub>3</sub> = R<sub>4</sub> = OH R<sub>2</sub> = H  
**8** R<sub>1</sub> = R<sub>2</sub> = R<sub>4</sub> = H R<sub>3</sub> = Oglc - rha  
**15** R<sub>1</sub> = R<sub>2</sub> = R<sub>4</sub> = H R<sub>3</sub> = Oglc  
**16** R<sub>1</sub> = R<sub>2</sub> = R<sub>4</sub> = H R<sub>3</sub> = OH

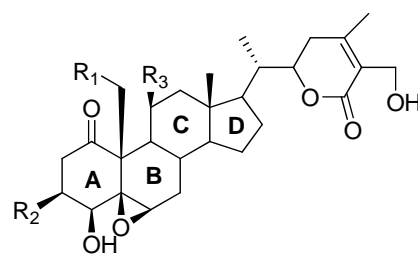

- 4** R<sub>1</sub> = OH R<sub>2</sub> = OCH<sub>3</sub> R<sub>3</sub> = H  
**5** R<sub>1</sub> = H R<sub>2</sub> = OCH<sub>3</sub> R<sub>3</sub> = OH  
**7** R<sub>1</sub> = OH R<sub>2</sub> = OSO<sub>3</sub>H R<sub>3</sub> = H  
**17** R<sub>1</sub> = R<sub>3</sub> = H R<sub>2</sub> = OCH<sub>3</sub>  
**18** R<sub>1</sub> = R<sub>3</sub> = H R<sub>2</sub> = OH  
**19** R<sub>1</sub> = R<sub>3</sub> = H R<sub>2</sub> = OSO<sub>3</sub>H  
**20** R<sub>1</sub> = R<sub>2</sub> = R<sub>3</sub> = H

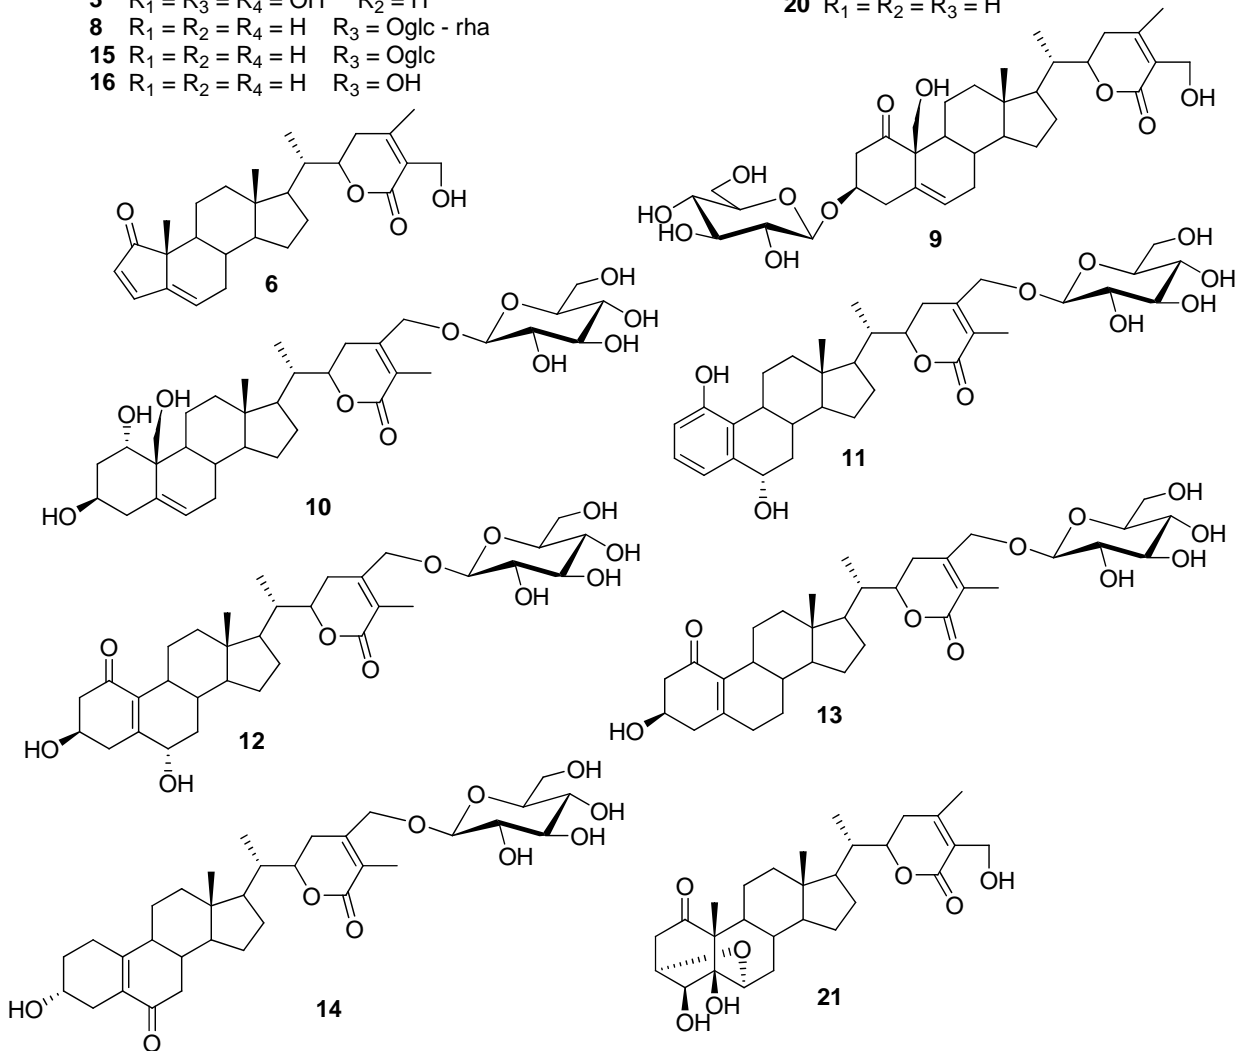



**S1(a)**  $^1\text{H}$  NMR spectrum of withalongolide A (**1**) in  $\text{C}_5\text{D}_5\text{N}$  (500 MHz)

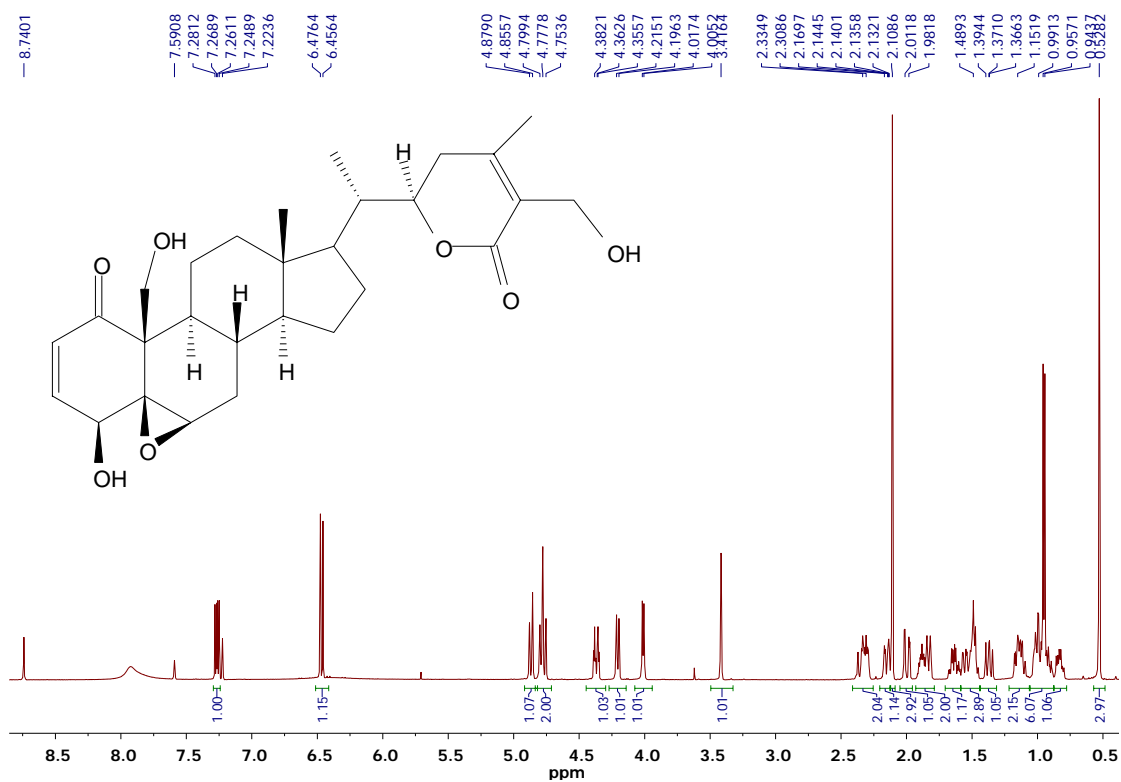

**S1(b)**  $^{13}\text{C}$  APT spectrum of withalongolide A (**1**) (125 MHz)

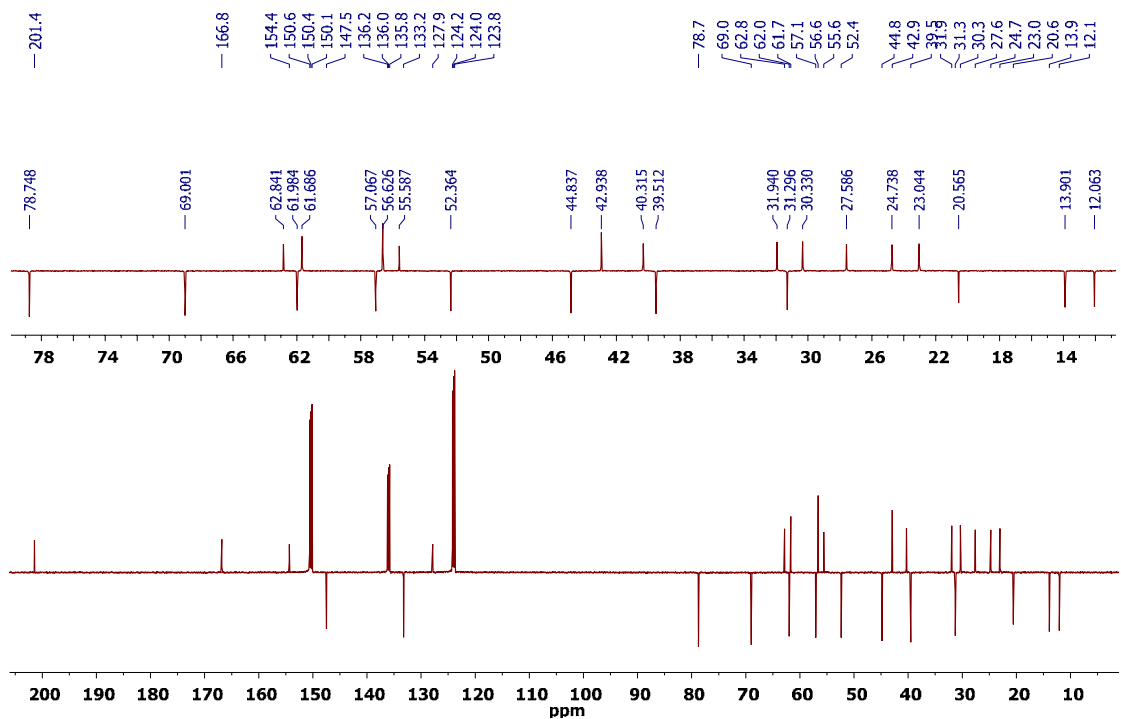

S1(c)  $^1\text{H}$ - $^1\text{H}$  COSY spectrum of withalongolide A (1)

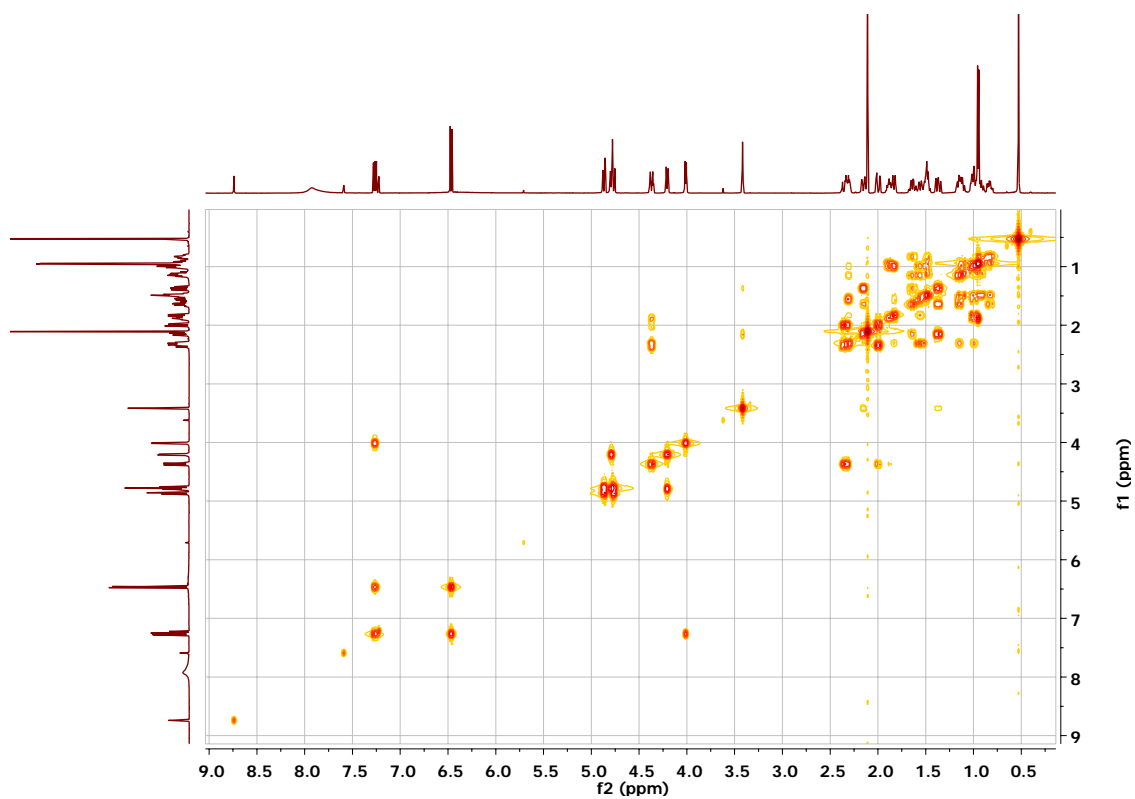

S1(d) HSQC spectrum of withalongolide A (1)

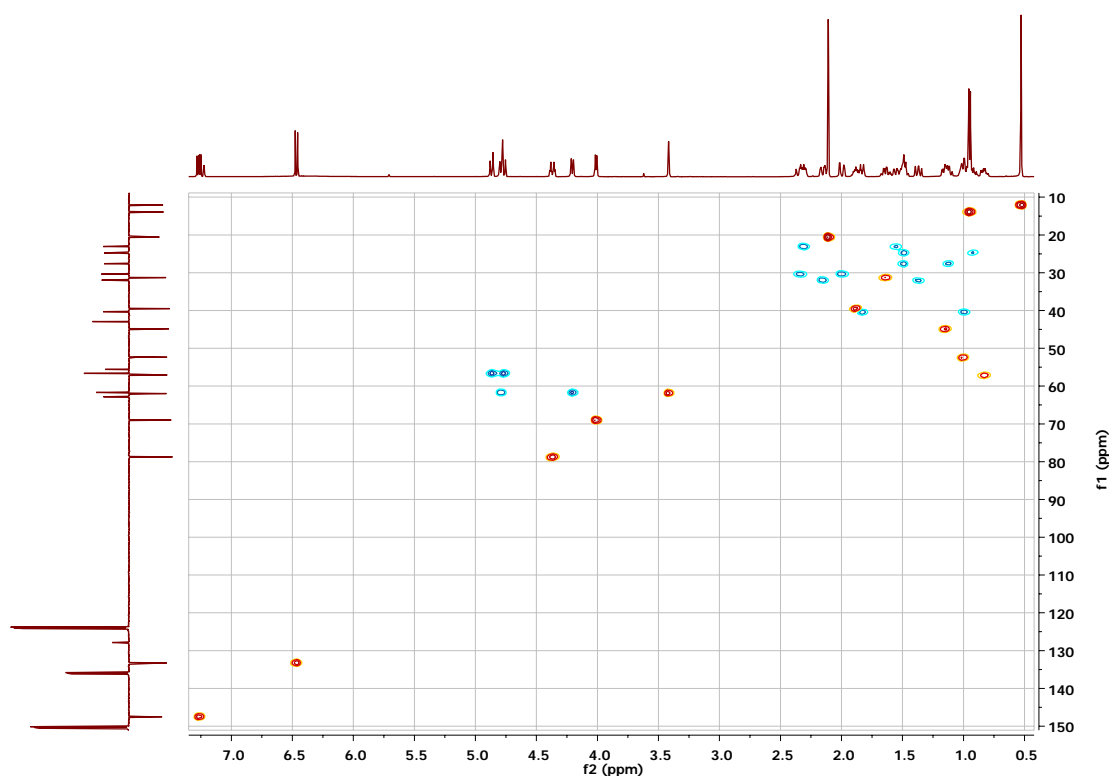

S1(e) HMBC spectrum of withalongolide A (1)

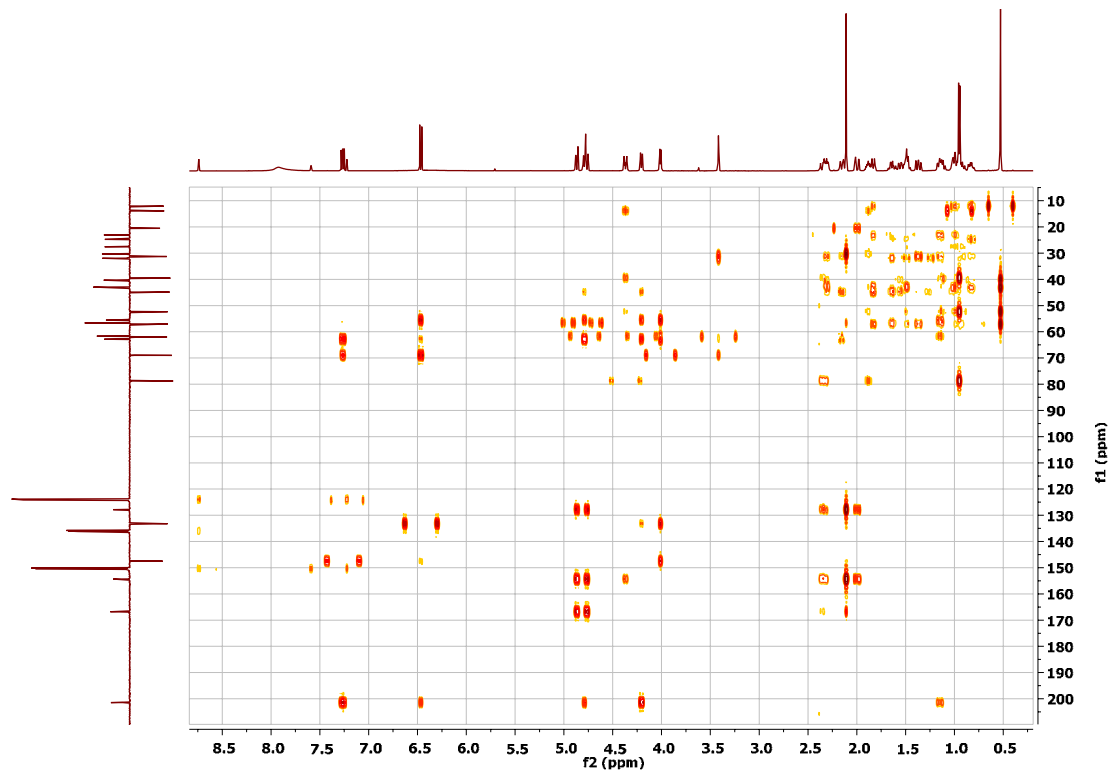

S1(f) ROESY spectrum of withalongolide A (1)

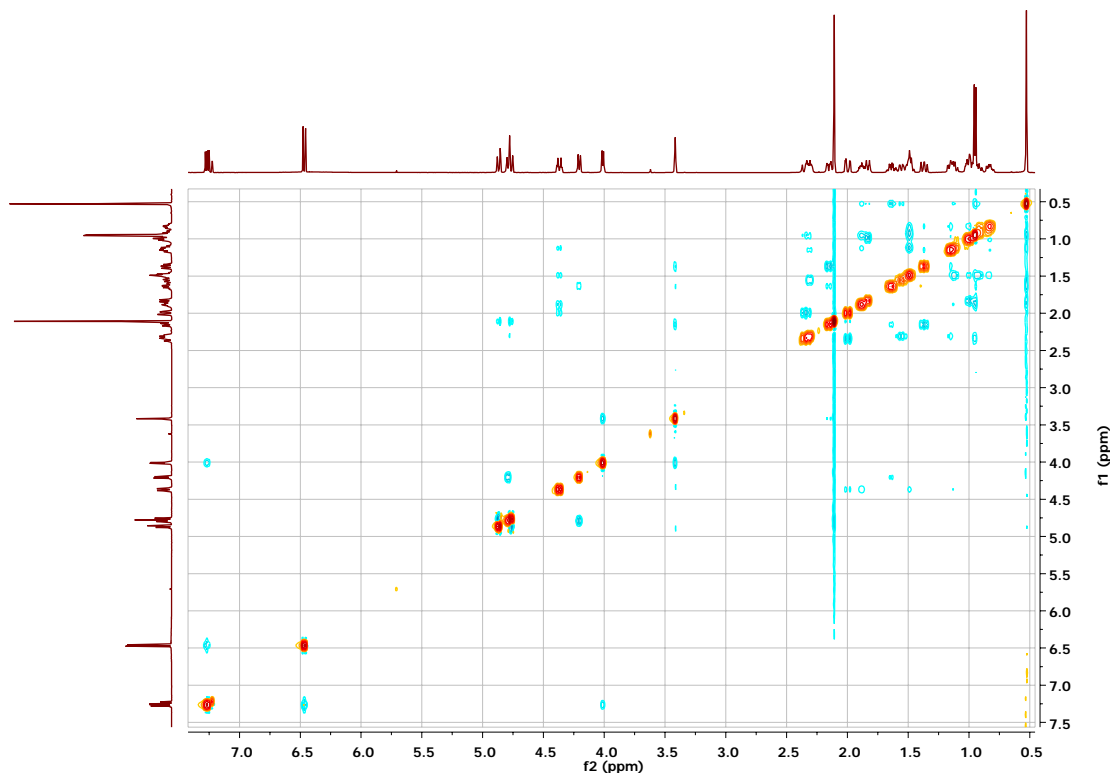

**S1(g)**  $^1\text{H}$  NMR spectrum of withalongolide A (**1**) in  $\text{CDCl}_3$  and  $\text{CD}_3\text{OD}$  (500 MHz)

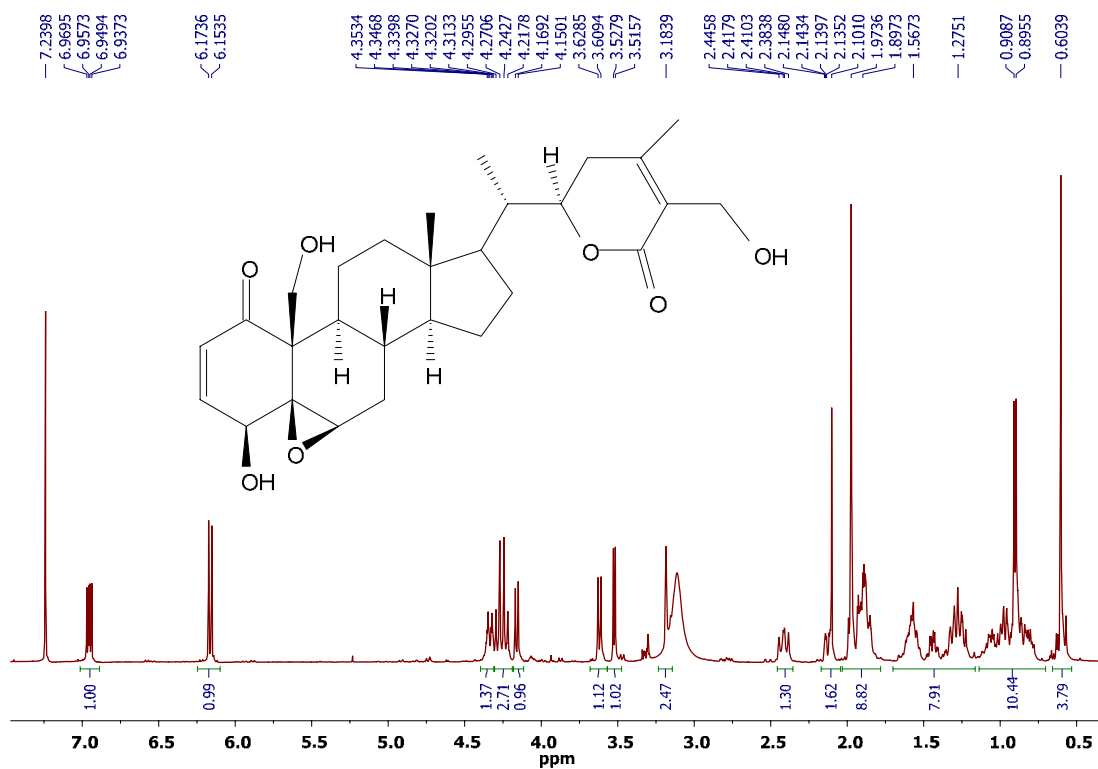

**S1(h)**  $^{13}\text{C}$  APT spectrum of withalongolide A (**1**) (125 MHz)

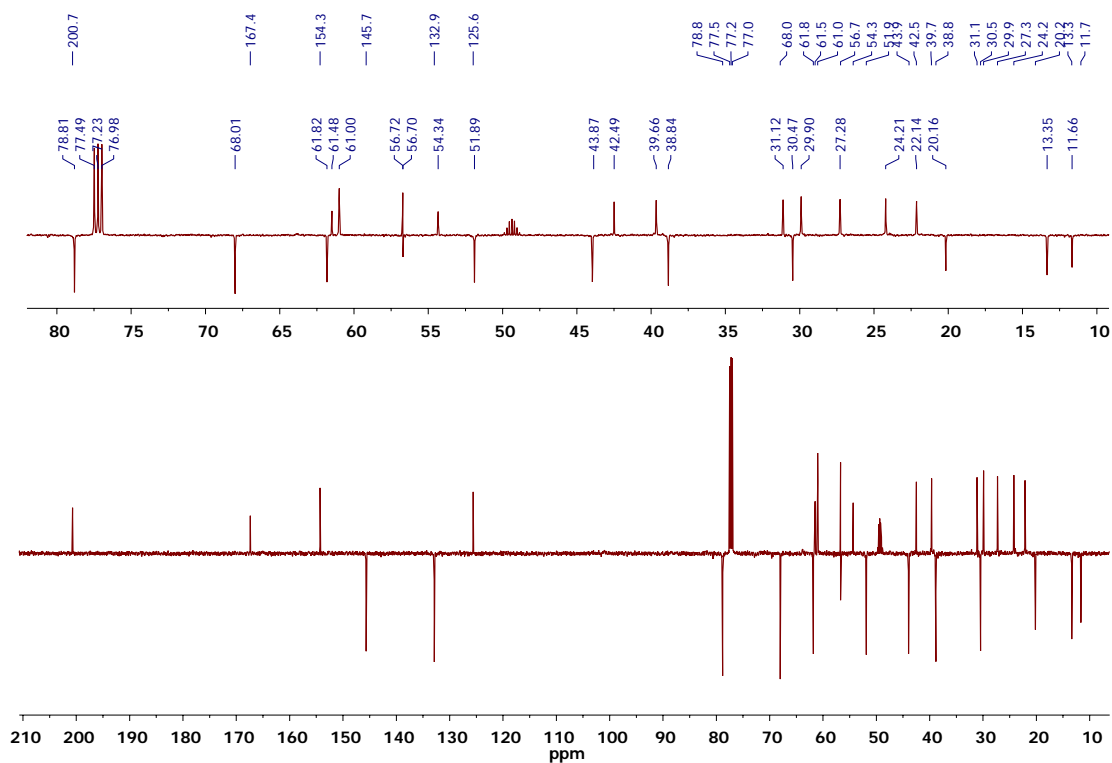

S1(i)  $^1\text{H}$ - $^1\text{H}$  COSY spectrum of withalongolide A (1)

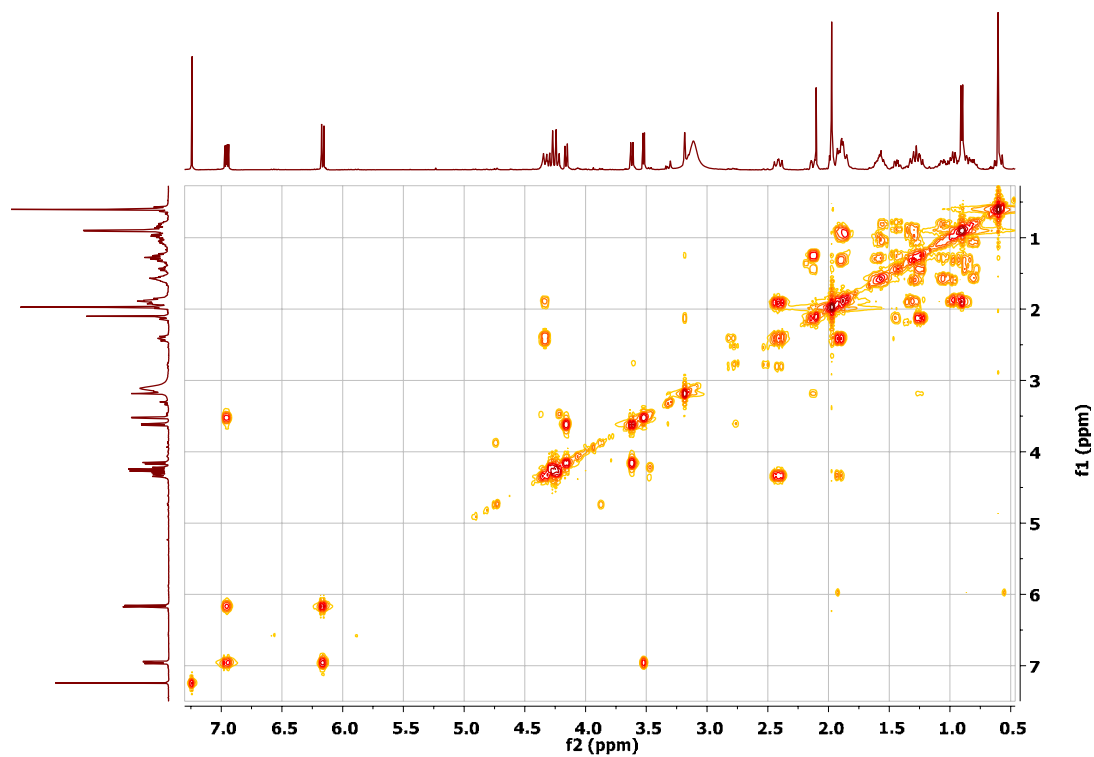

S1(j) HSQC spectrum of withalongolide A (1)

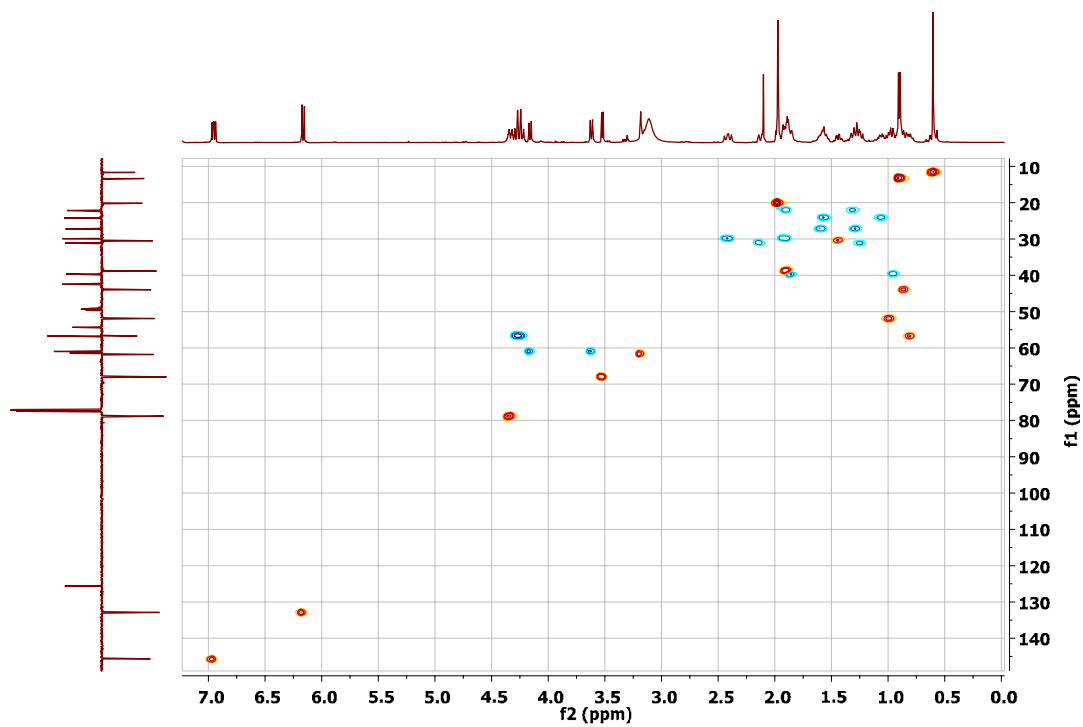

S1(k) HMBC spectrum of withalongolide A (1)

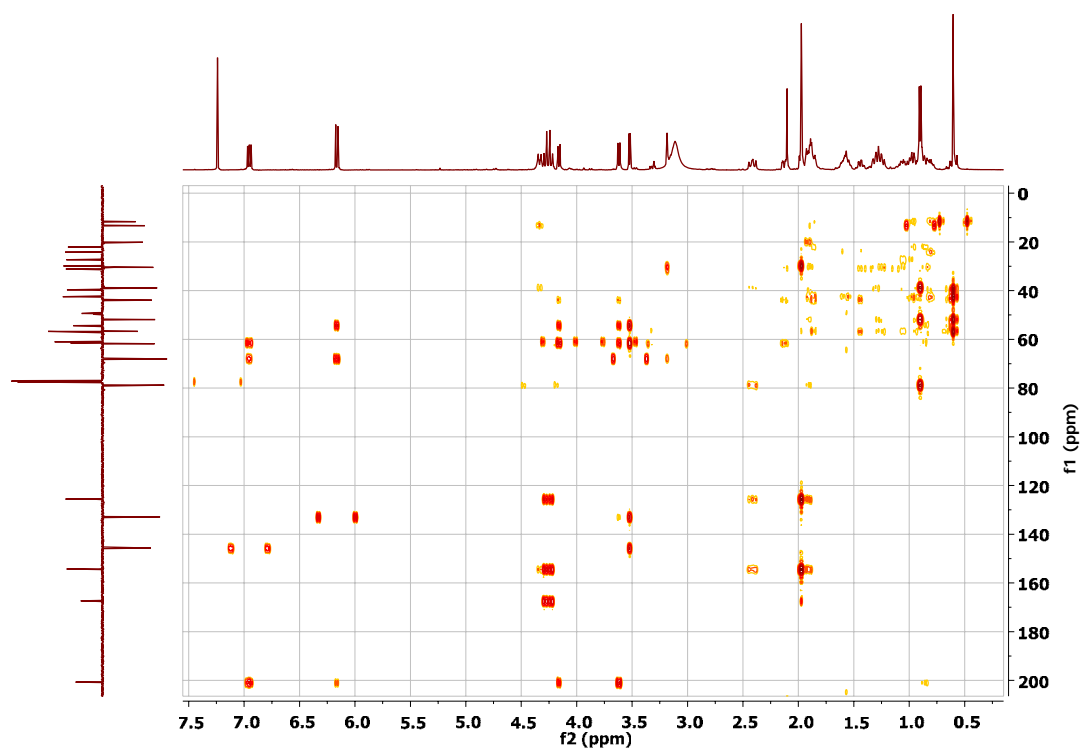

S1(l) ROESY spectrum of withalongolide A (1)

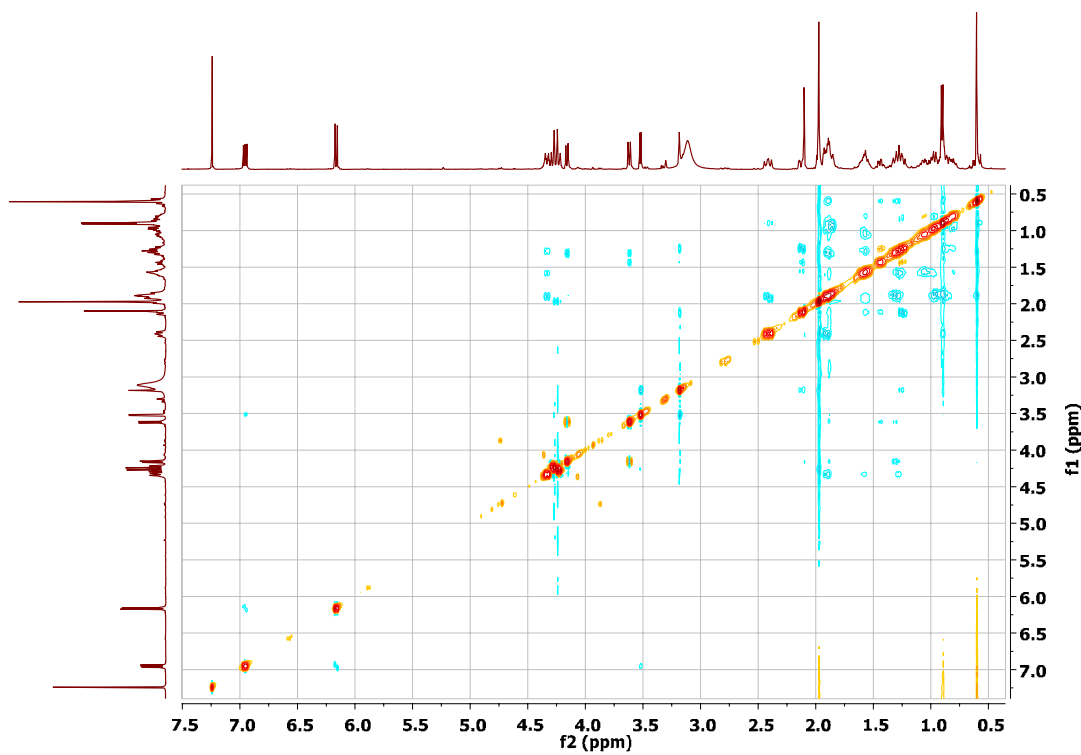

**S1a(a)**  $^1\text{H}$  NMR spectrum of withalongolide A 4, 19,27-triacetae (**1a**) in  $\text{CDCl}_3$  (500 MHz)

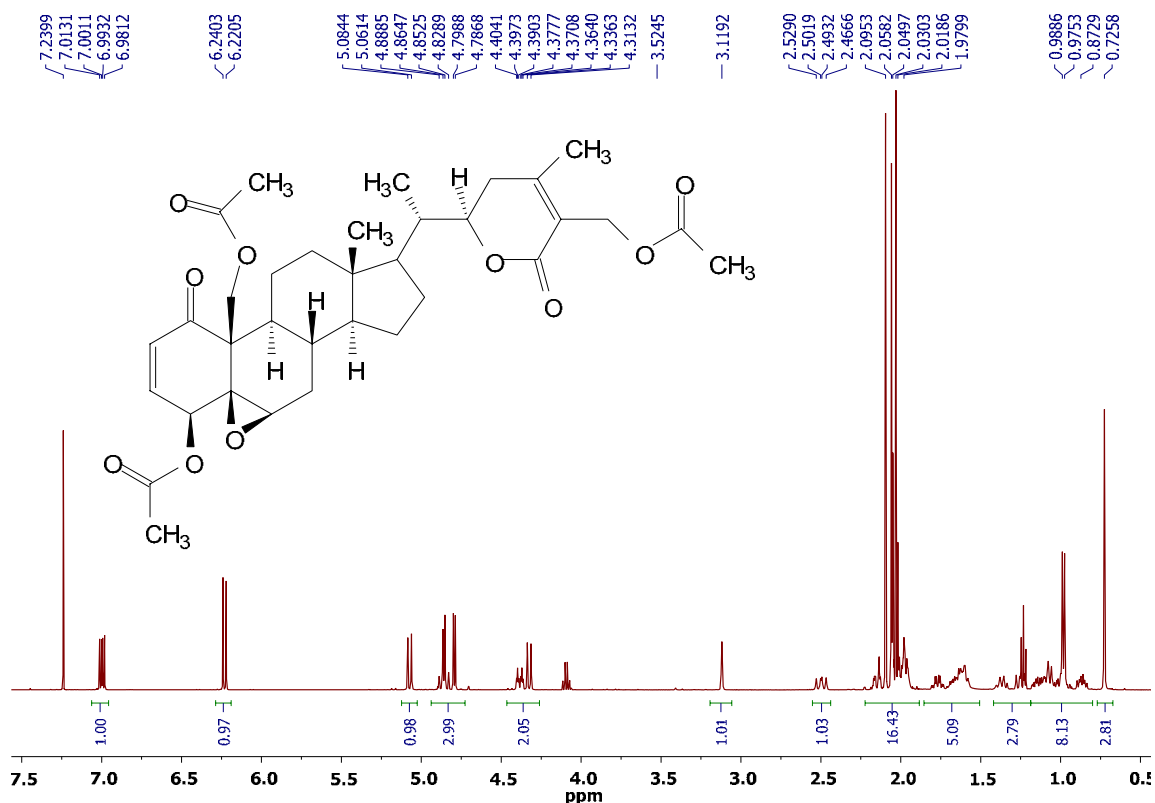

**S1a(b)**  $^{13}\text{C}$  APT spectrum of withalongolide A 4, 19,27-triacetae (**1a**) (125 MHz)

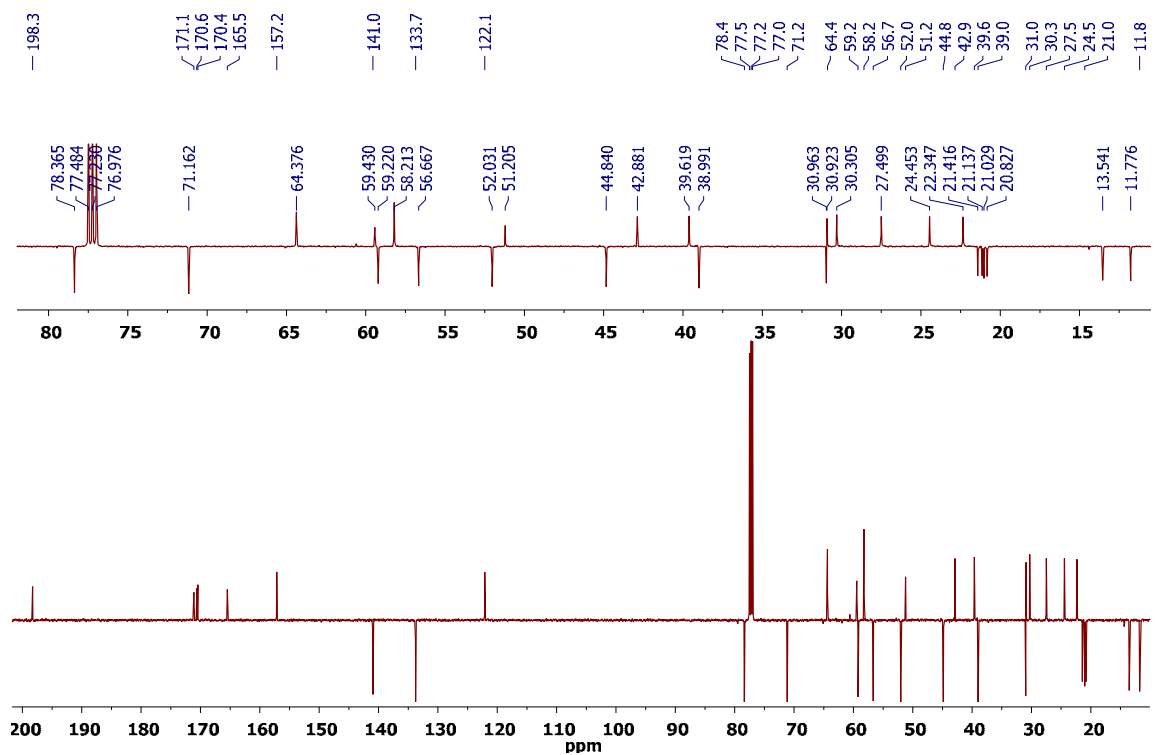

S1a(c)  $^1\text{H}$ - $^1\text{H}$  COSY spectrum of withalongolide A 4, 19,27-triacetae (**1a**)

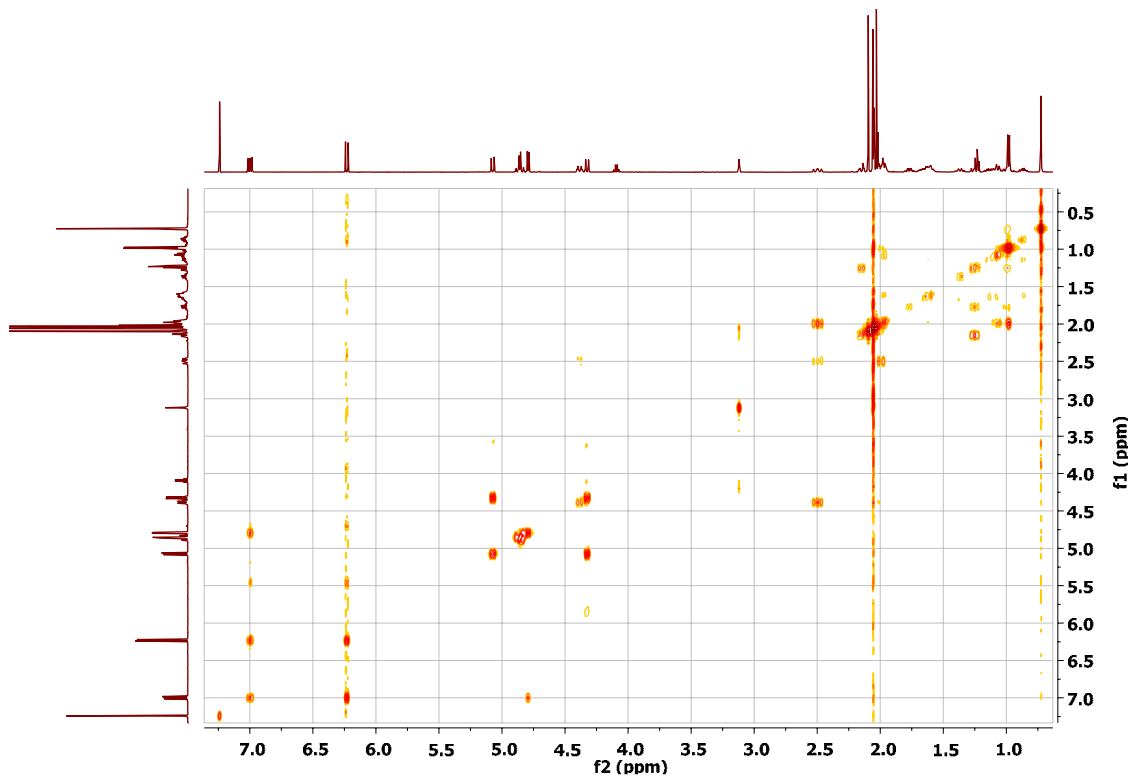

S1a(d) HSQC spectrum of withalongolide A 4, 19,27-triacetae (**1a**)

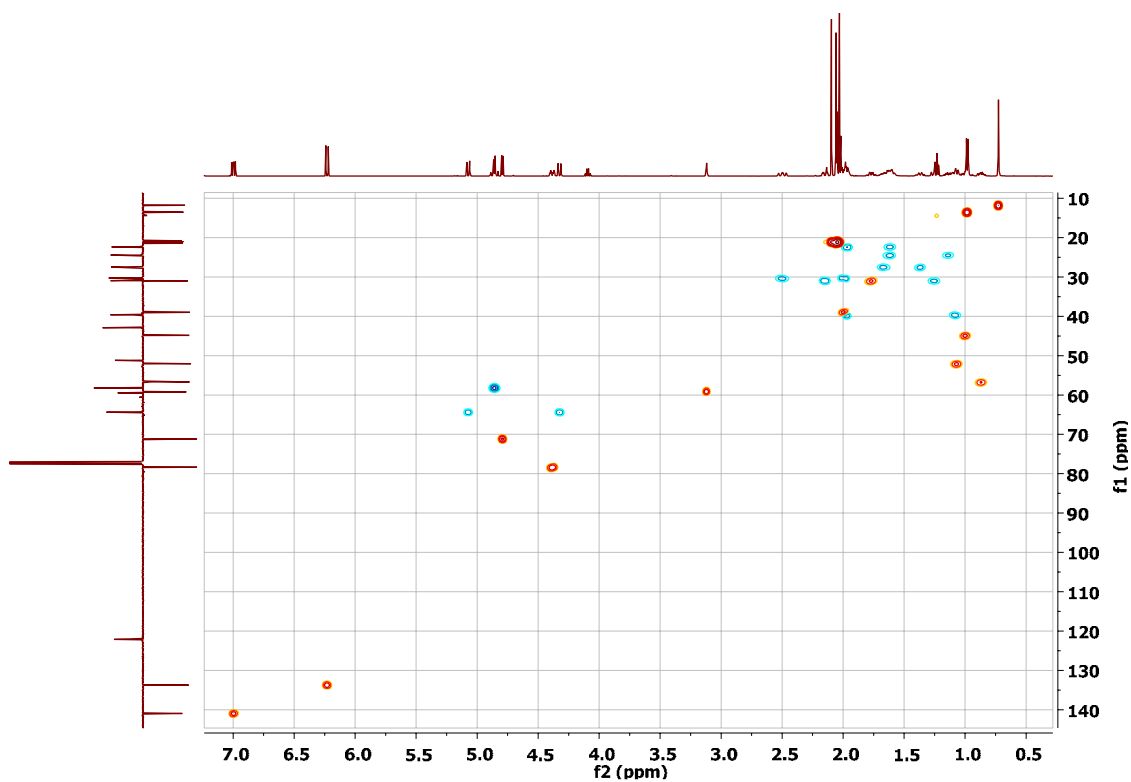



S1a(e) HMBC spectrum of withalongolide A 4, 19,27-triacetae (**1a**)

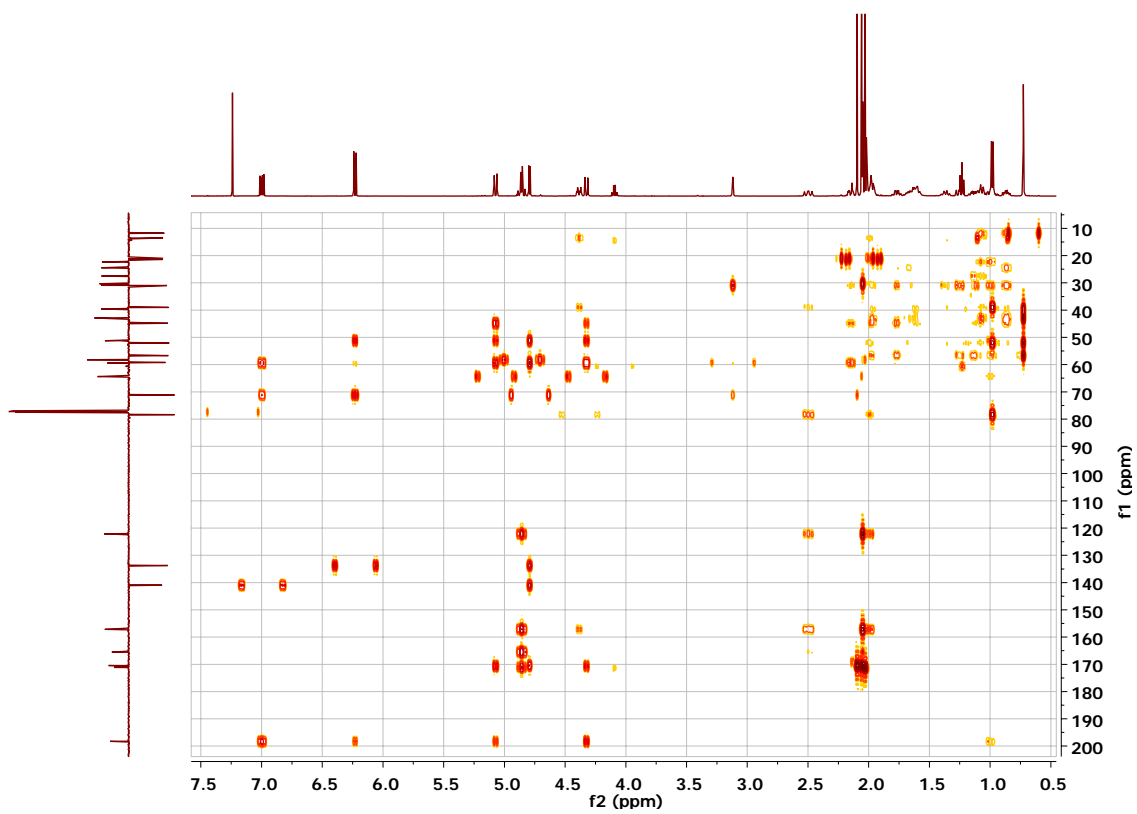

S1a(f) ROESY spectrum of withalongolide A 4, 19,27-triacetae (**1a**)

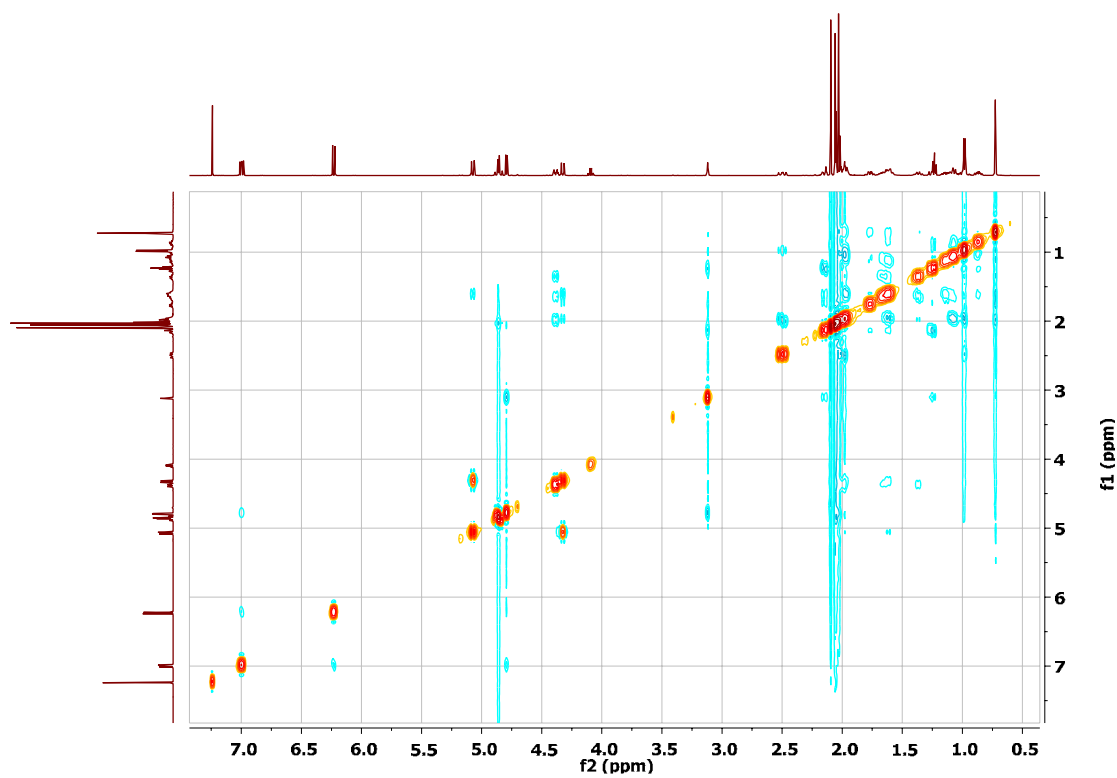

**S1b(a)**  $^1\text{H}$  NMR spectrum of withalongolide A 4,27-diacetae (**1b**) in  $\text{CDCl}_3$  (500 MHz)

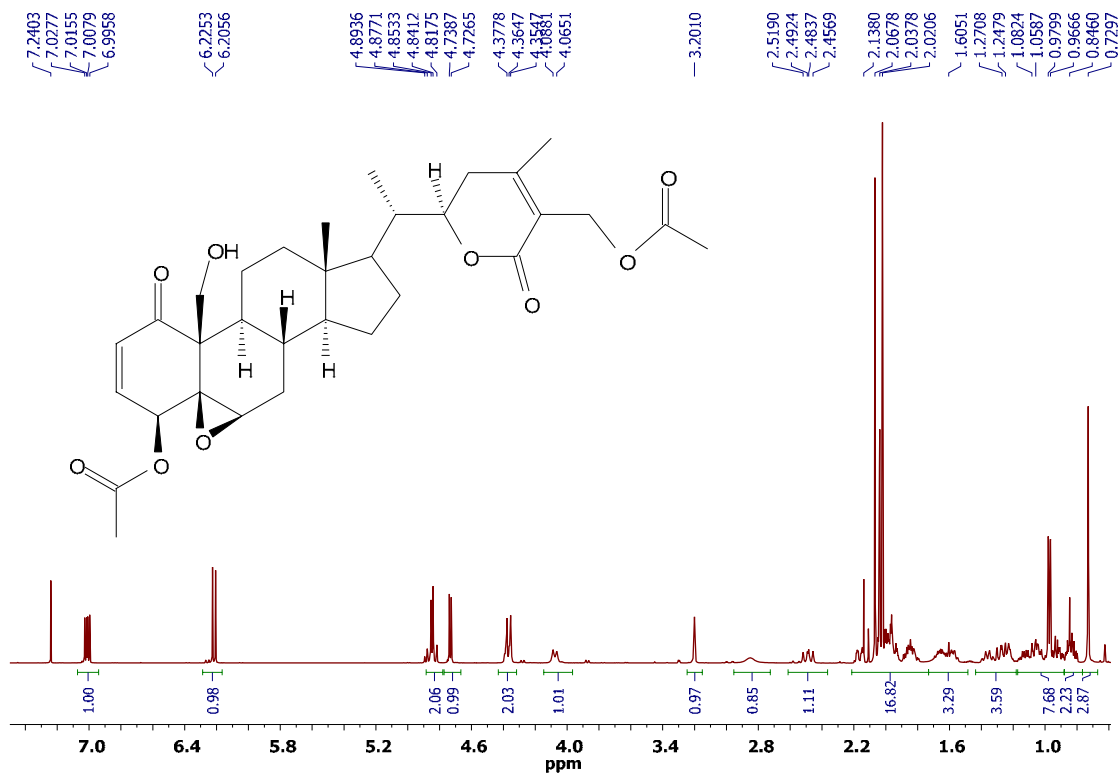

**S1b(b)**  $^{13}\text{C}$  APT spectrum of withalongolide A 4,27-diacetae (**1b**) (125 MHz)

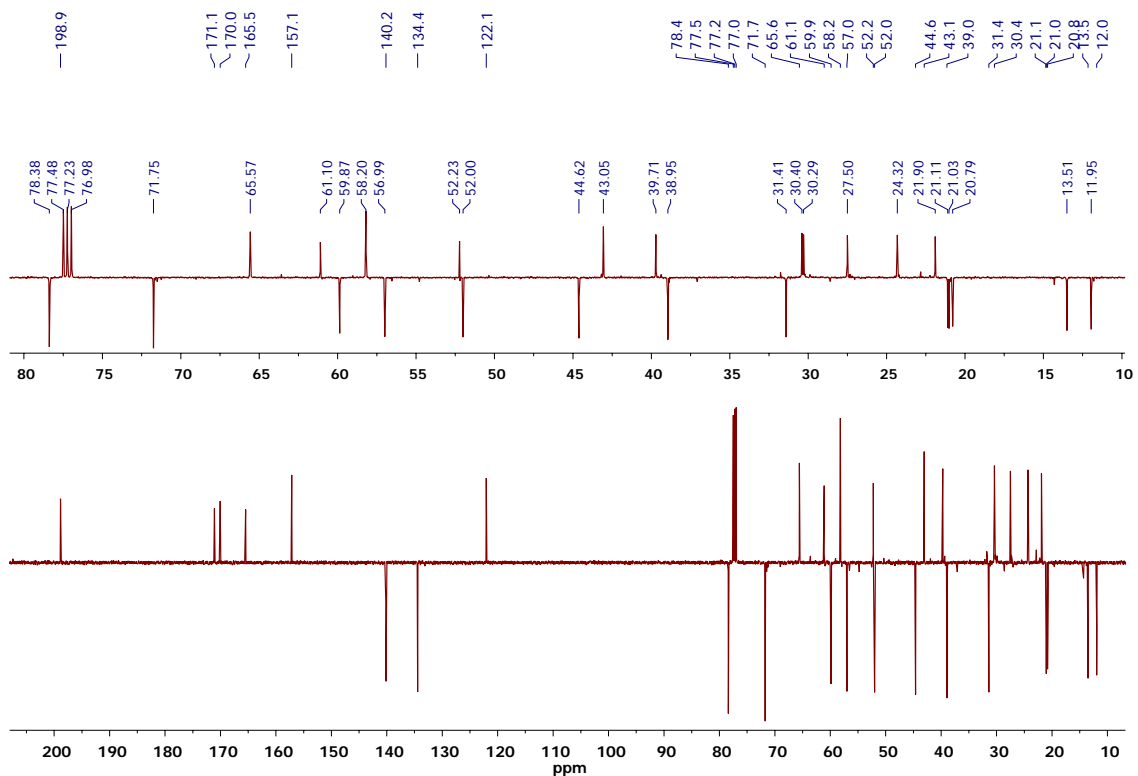



S1b(e) HMBC spectrum of withalongolide A 4,27-diacetate (**1b**)

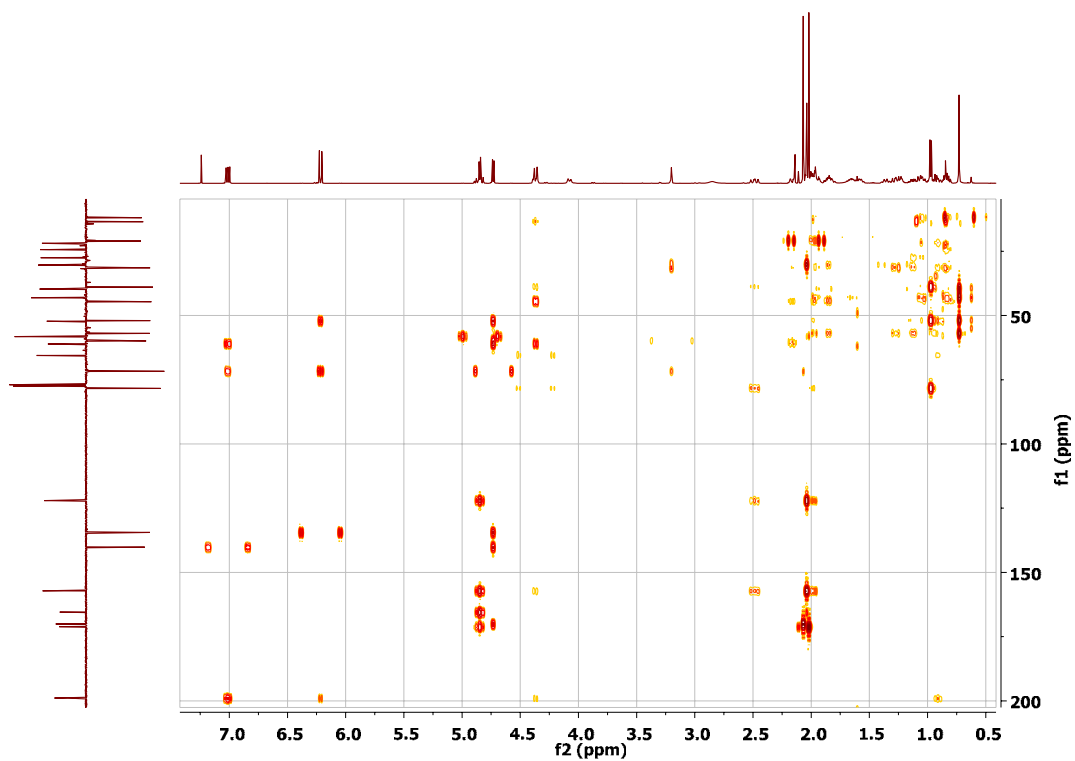

S2(a) <sup>1</sup>H NMR spectrum of withalongolide B (**2**) in CHCl<sub>3</sub> (400 MHz)

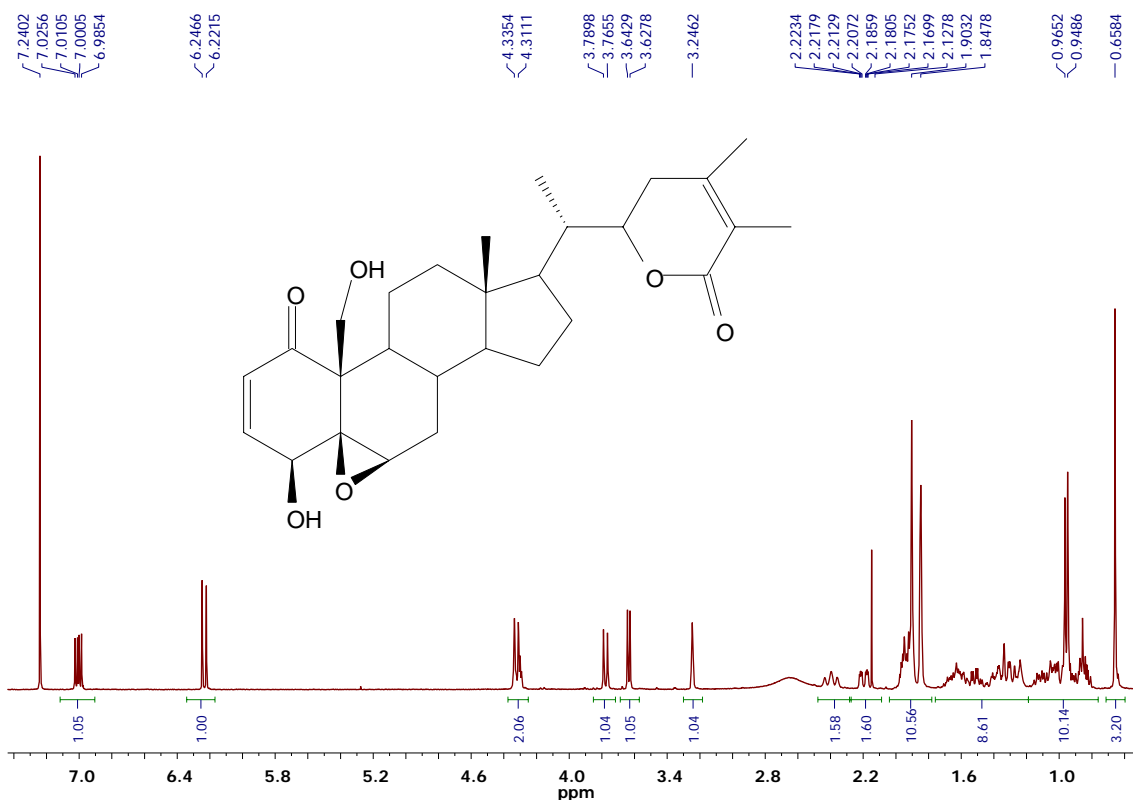

S2(b)  $^{13}\text{C}$  APT spectrum of withalongolide B (2) (125 MHz)

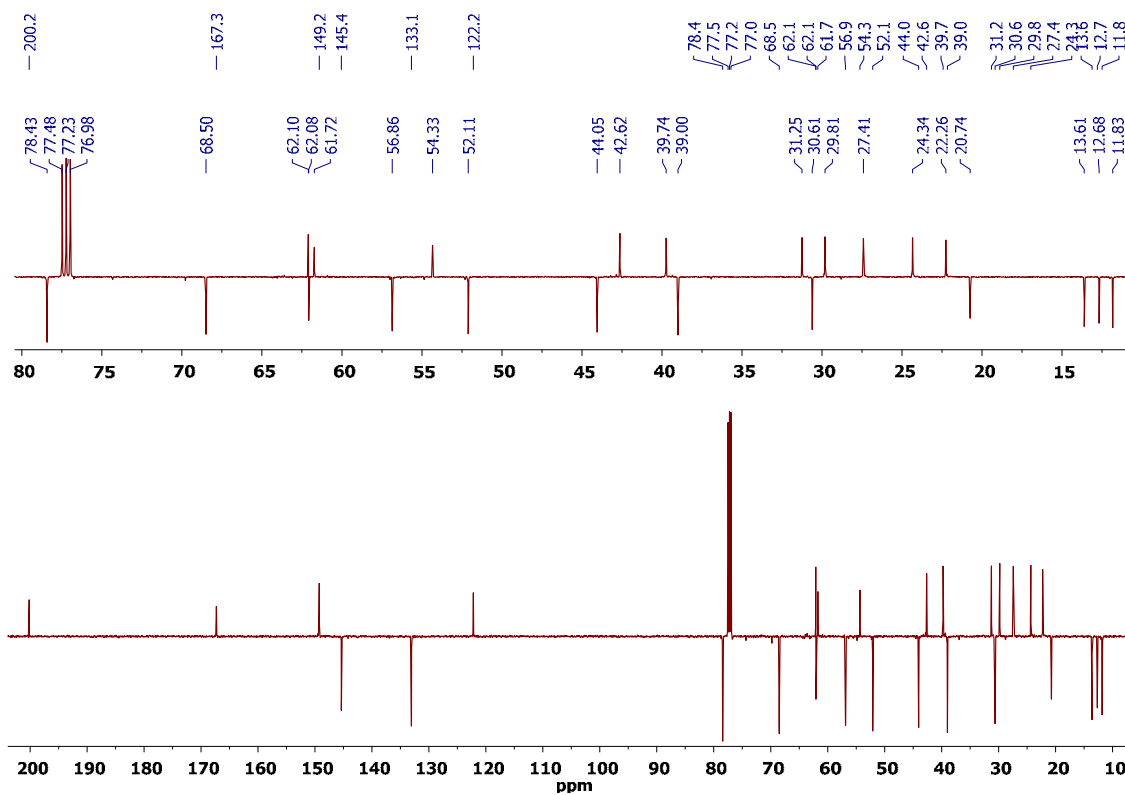

S2(c)  $^1\text{H}$ - $^1\text{H}$  COSY spectrum of withalongolide B (2)

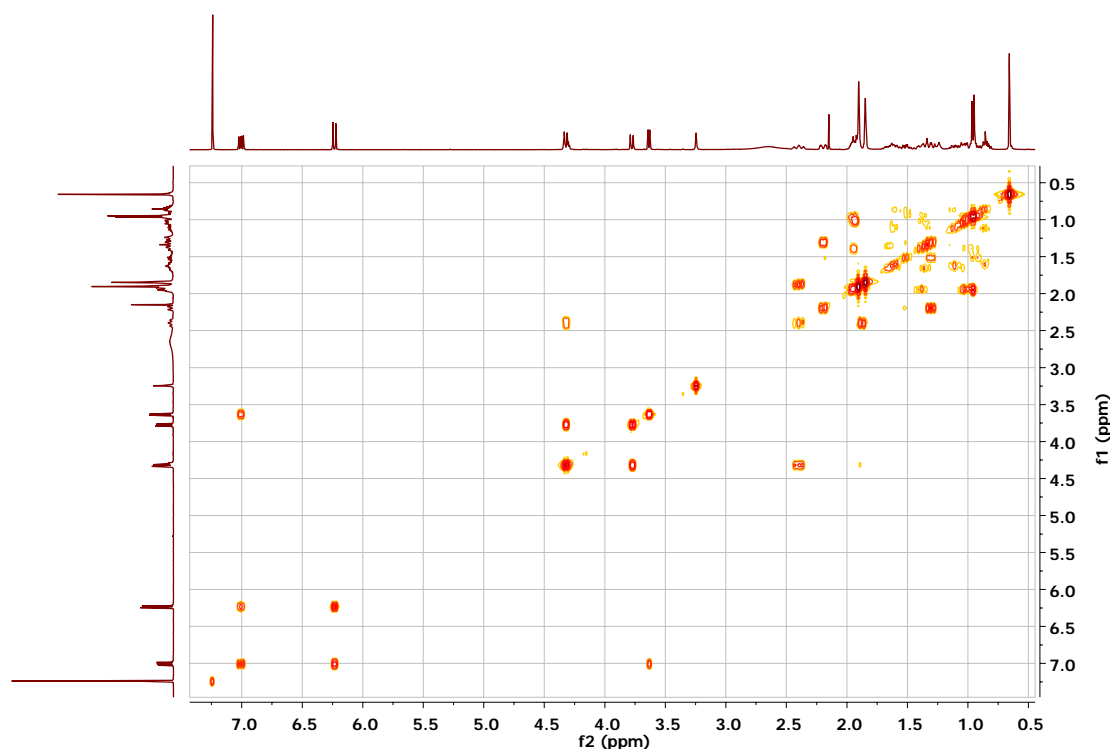

S2(d) HSQC spectrum of withalongolide B (2)

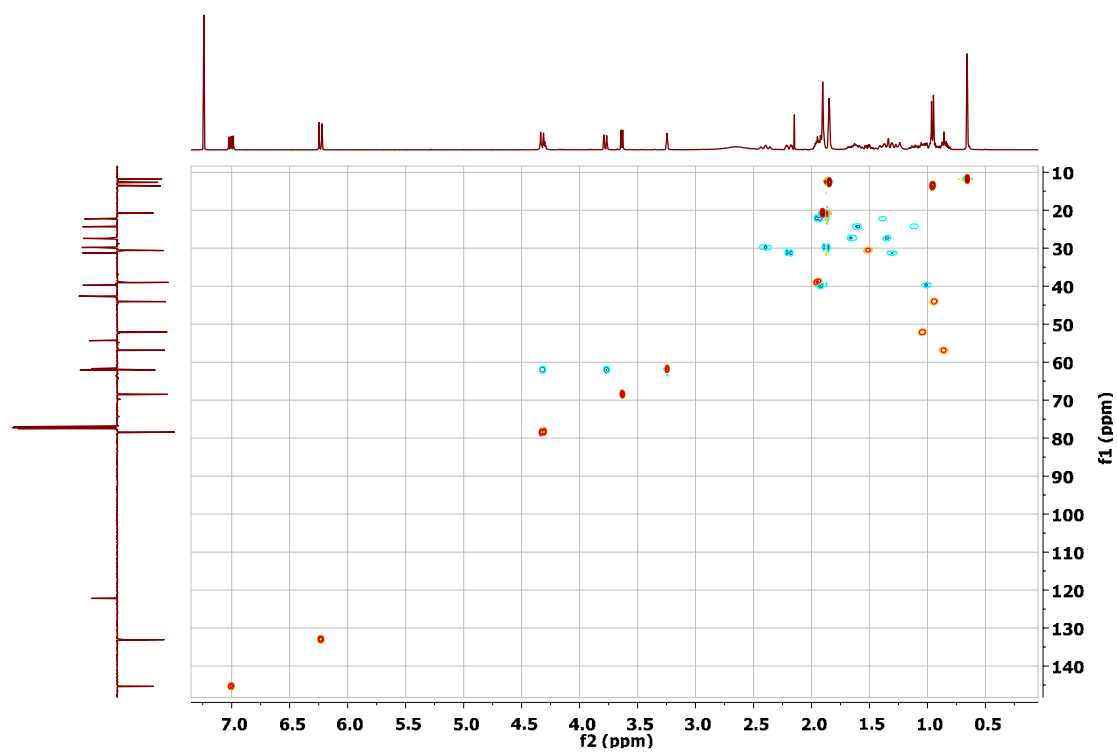

S2(e) HMBC spectrum of withalongolide B (2)

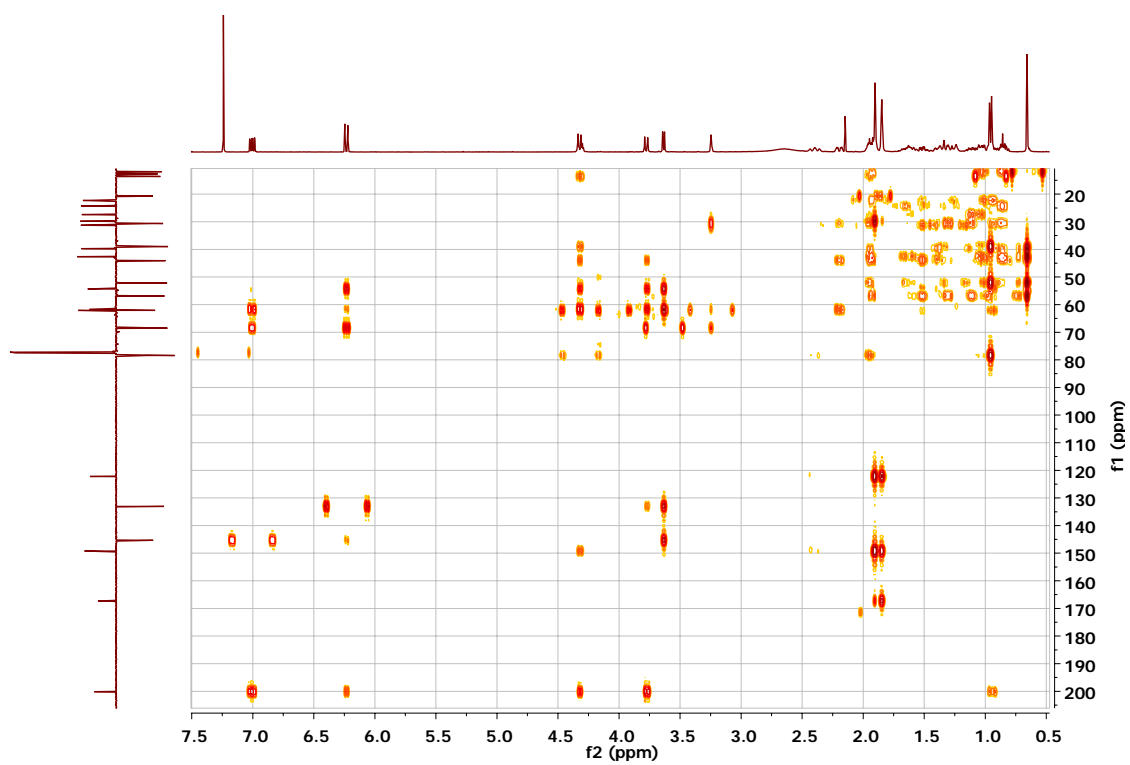

S2(f) ROESY spectrum of withalongolide B (2)

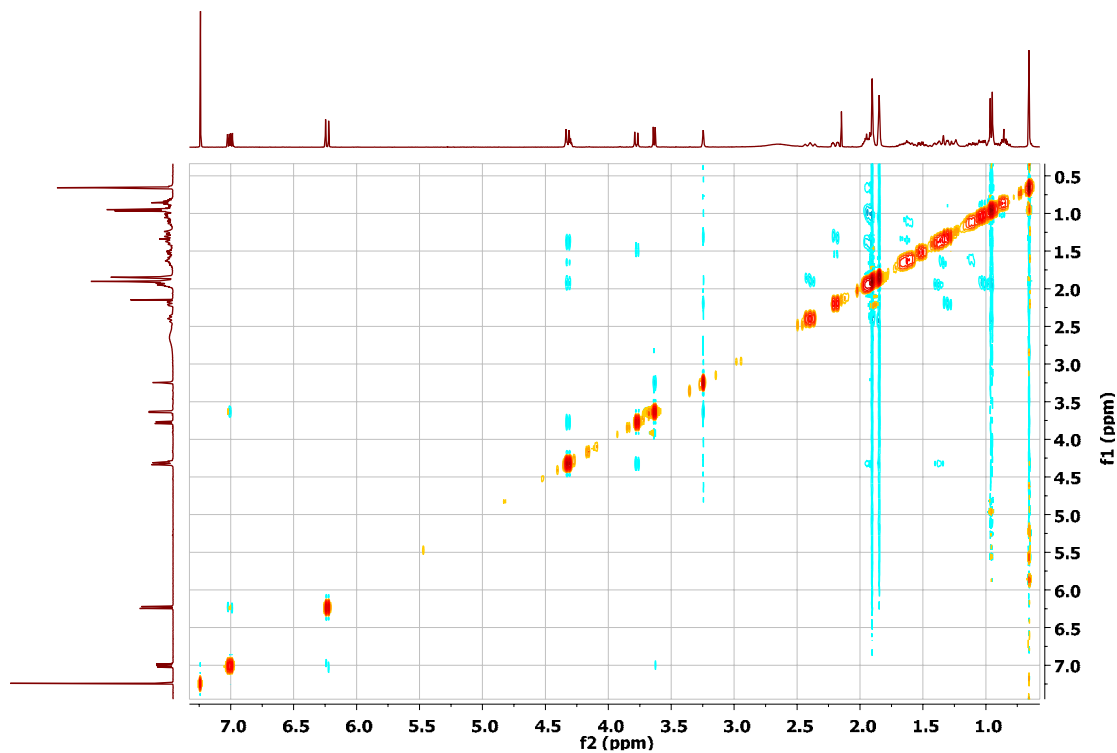

S2a(a) <sup>1</sup>H NMR spectrum of withalongolide B 4,19-diacetate (2a) in CDCl<sub>3</sub> (500 MHz)

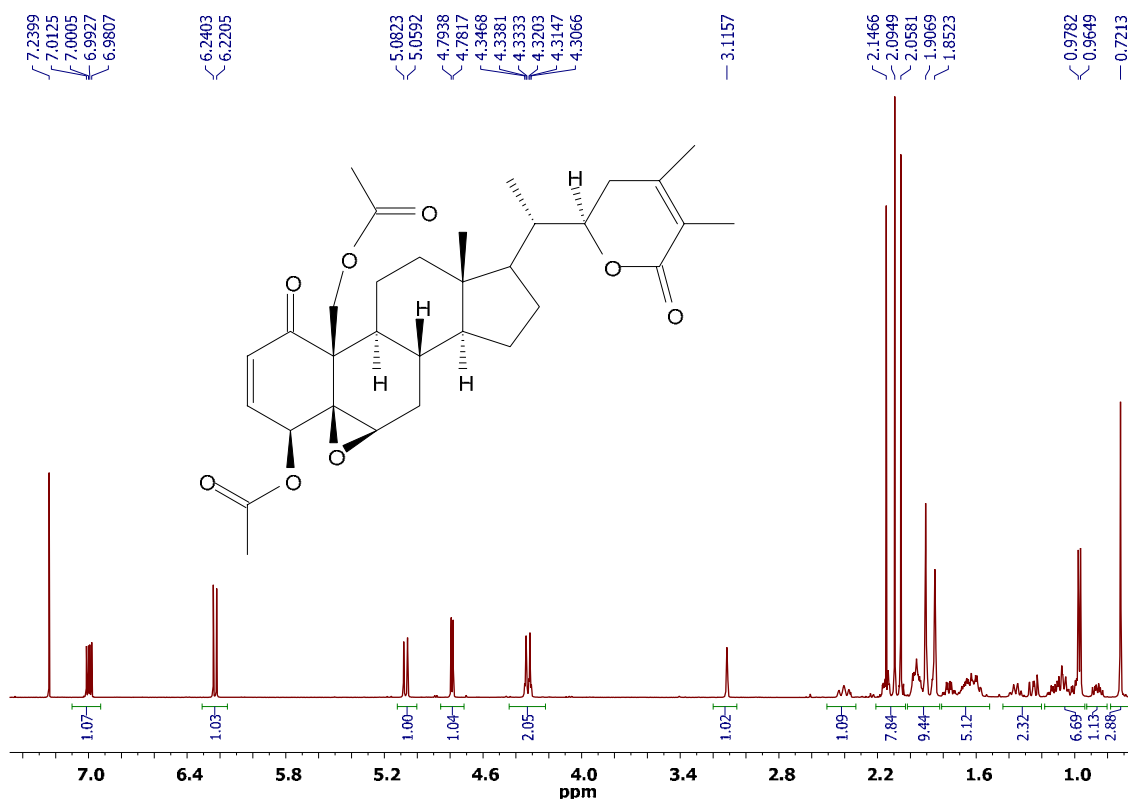

S2a(b)  $^{13}\text{C}$  APT spectrum of withalongolide B 4,19-diacetate(2a) (125 MHz)

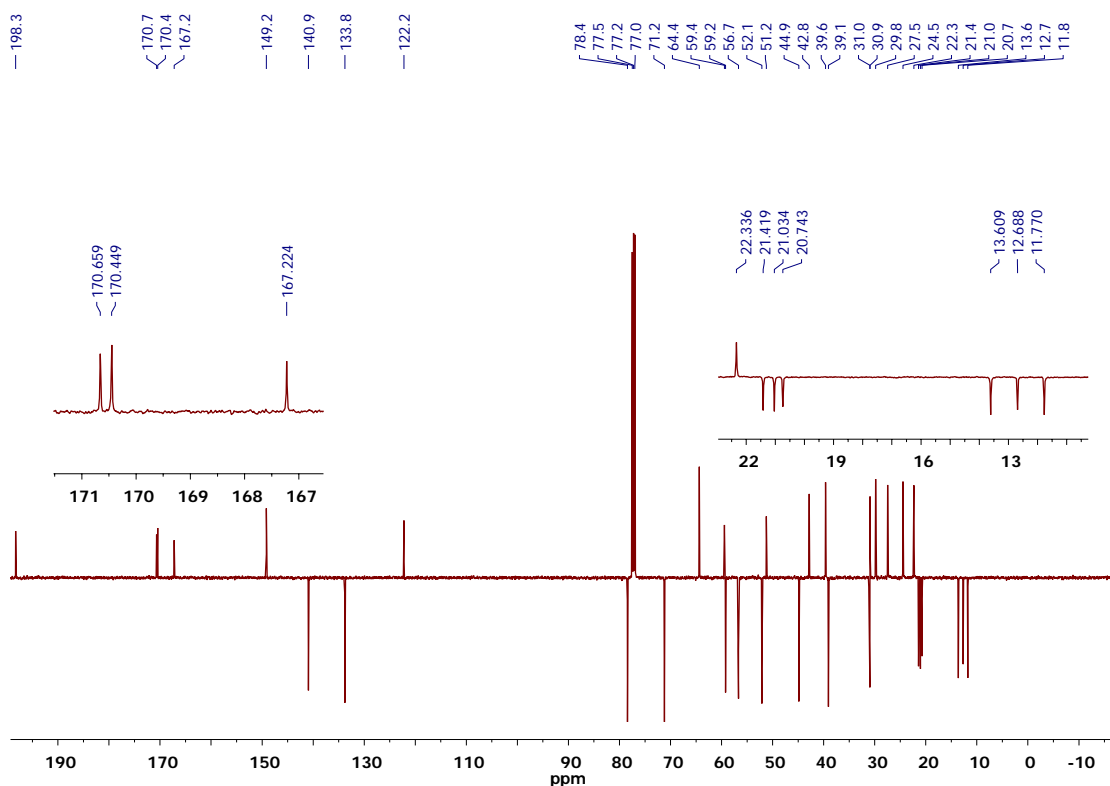

S2a(c)  $^1\text{H}$ - $^1\text{H}$  COSY spectrum of withalongolide B 4,19-diacetate(2a)

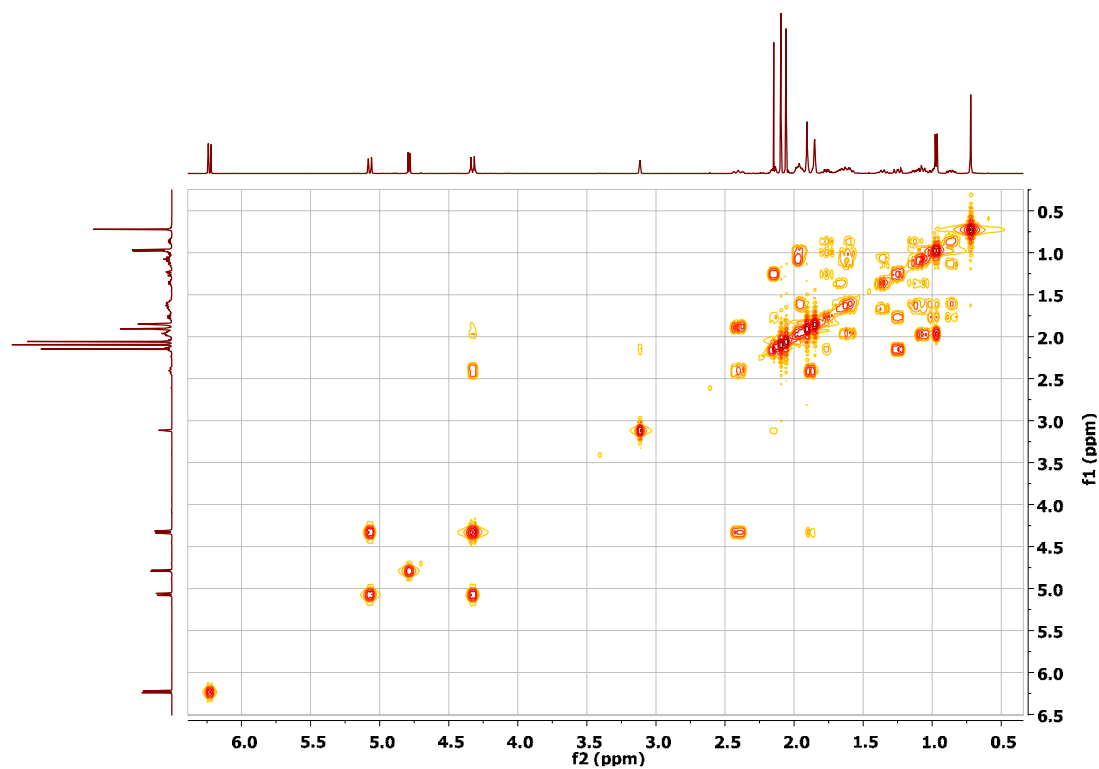



S2a(d) HSQC spectrum of withalongolide B 4,19-diacetate(2a)

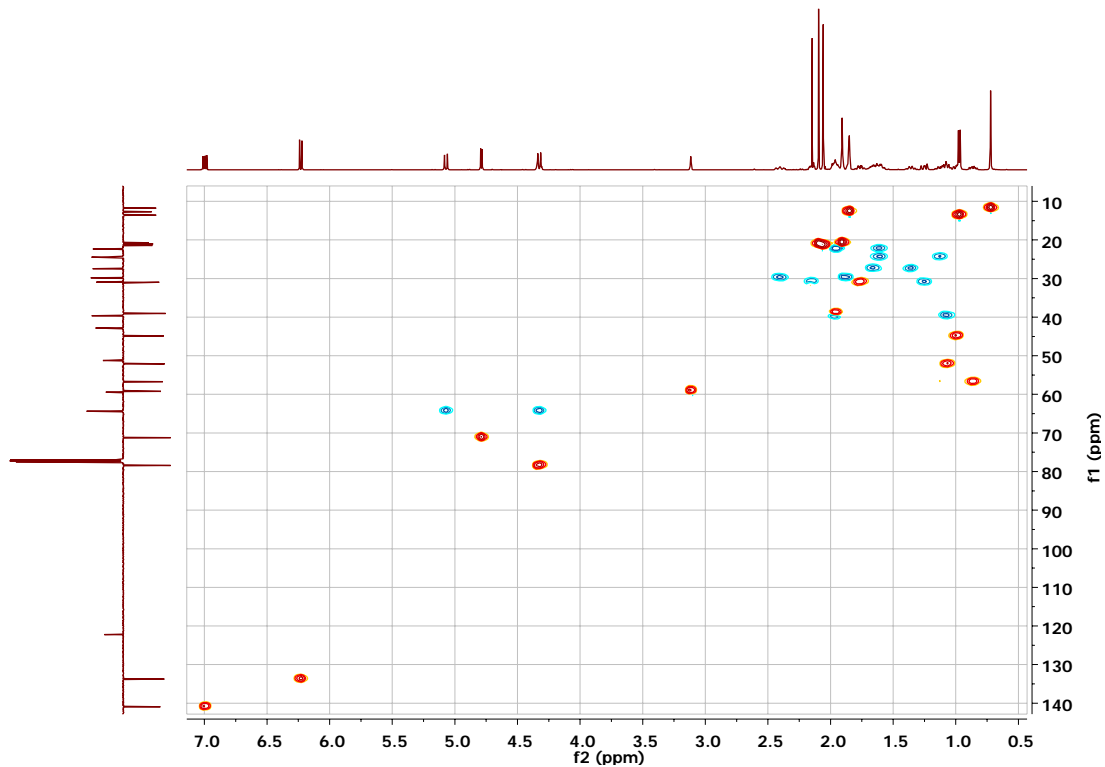

S2a(e) HMBC spectrum of withalongolide B 4,19-diacetate(2a)

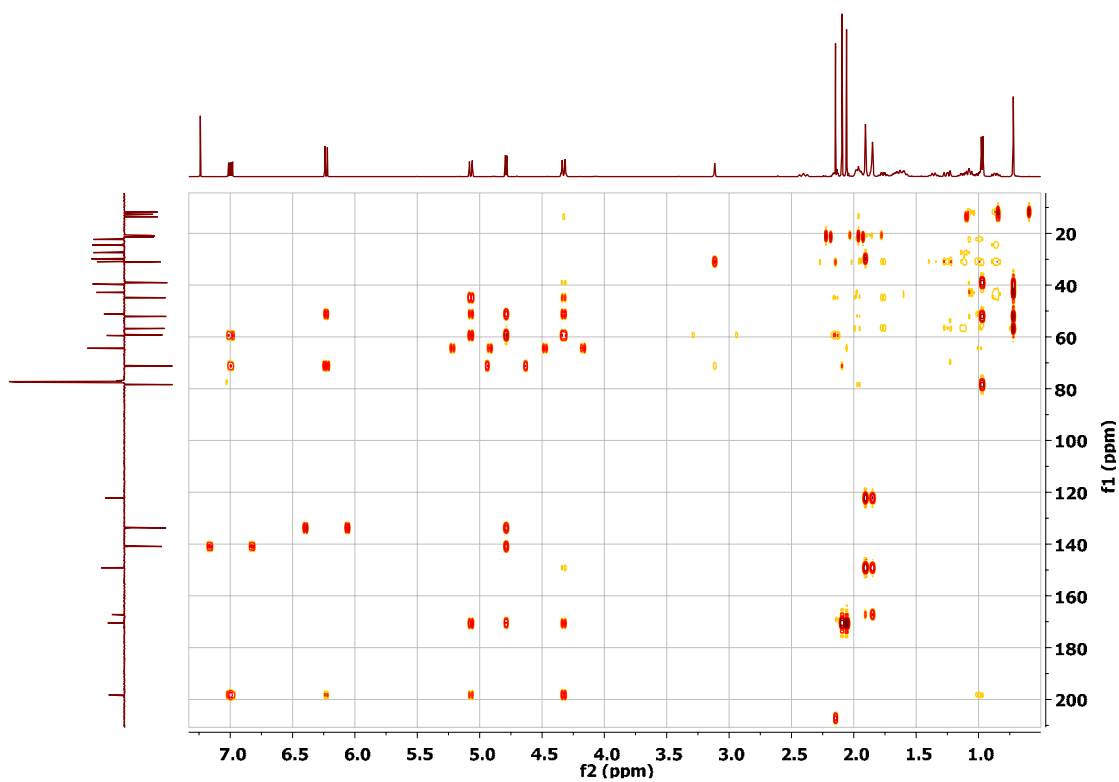

**S2b(a)**  $^1\text{H}$  NMR spectrum of withalongolide B 4-acetate (**2b**) in  $\text{CDCl}_3$  (500 MHz)

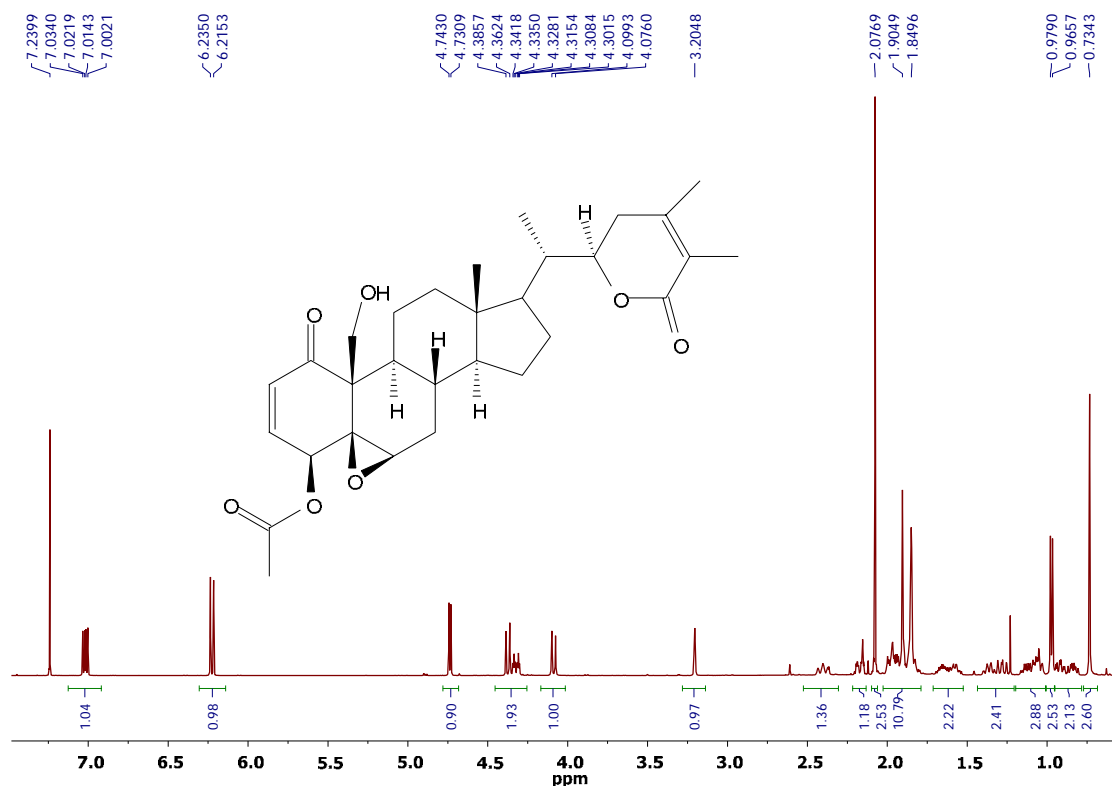

**S2b(b)**  $^{13}\text{C}$  APT spectrum of withalongolide B 4-acetate (**2b**) (125 MHz)

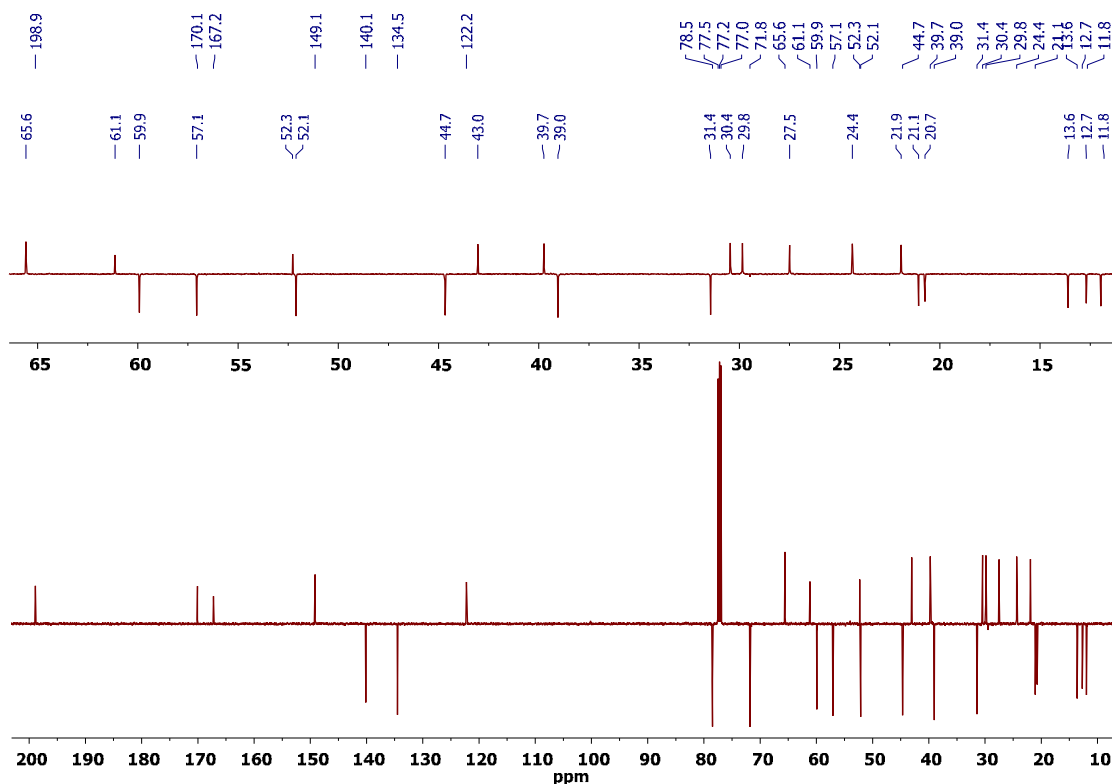

S2b(c)  $^1\text{H}$ - $^1\text{H}$  COSY spectrum of withalongolide B 4-acetate (**2b**)

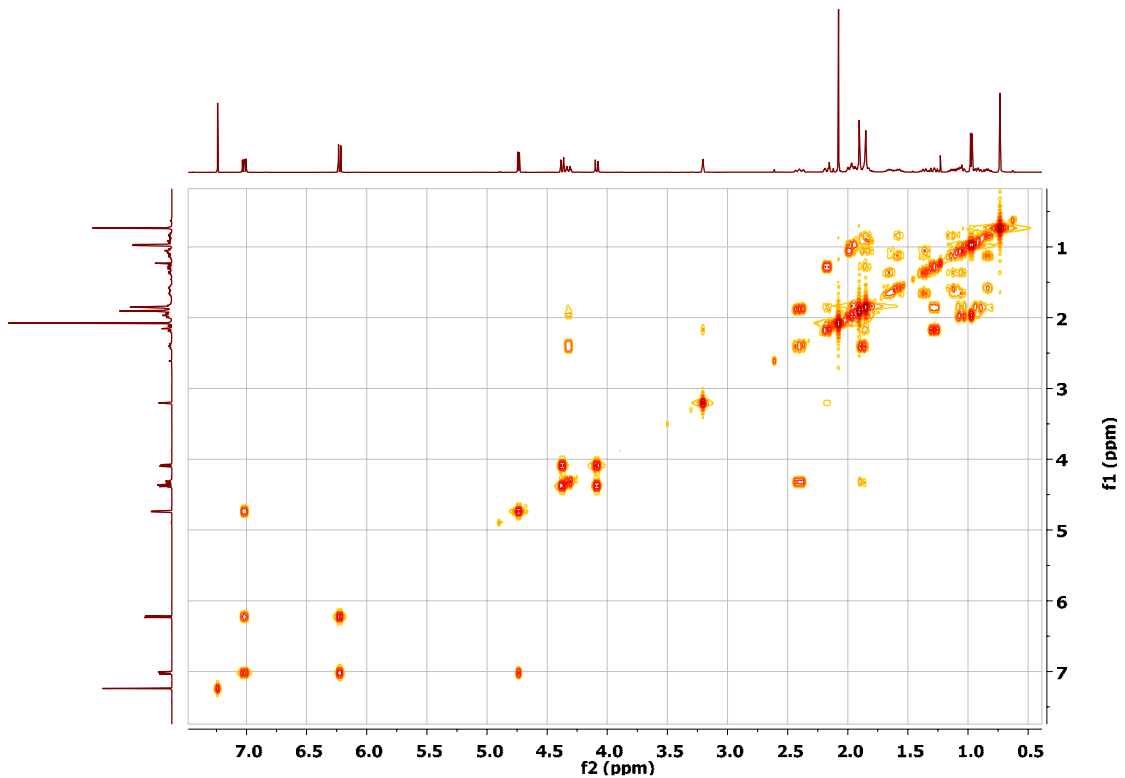

S2b(d) HSQC spectrum of withalongolide B 4-acetate (**2b**)

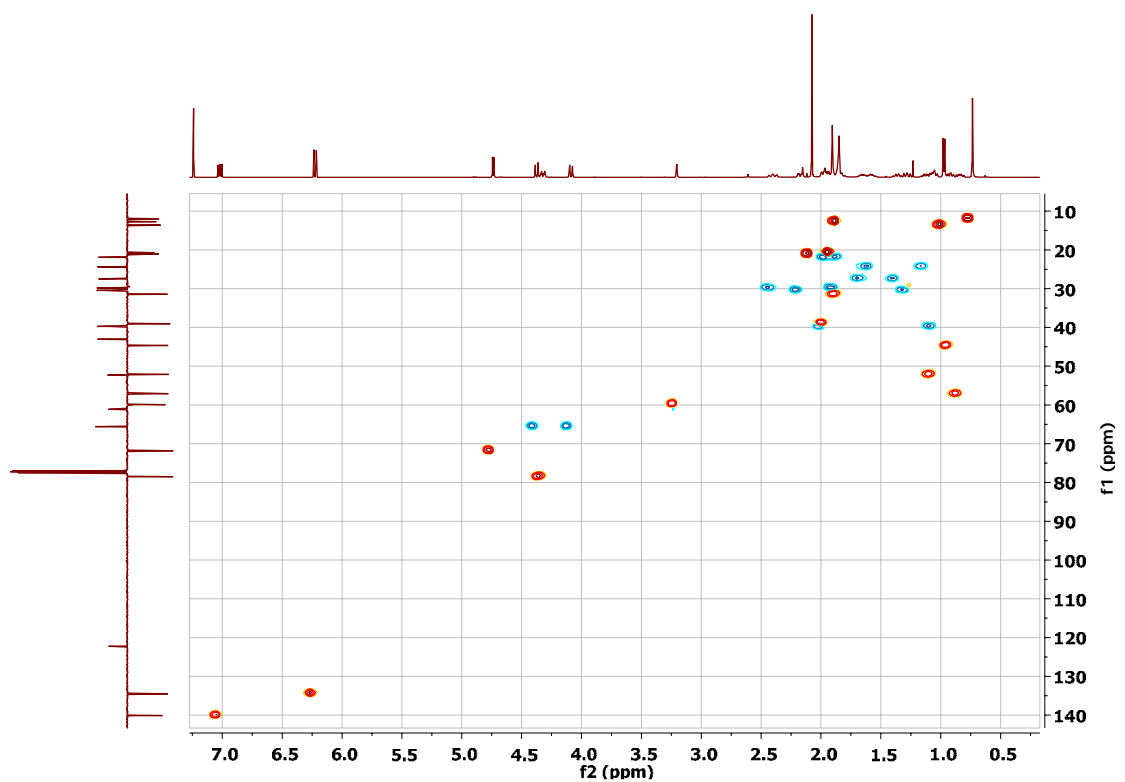

S2b(e) HMBC spectrum of withalongolide B 4-acetate (2b)

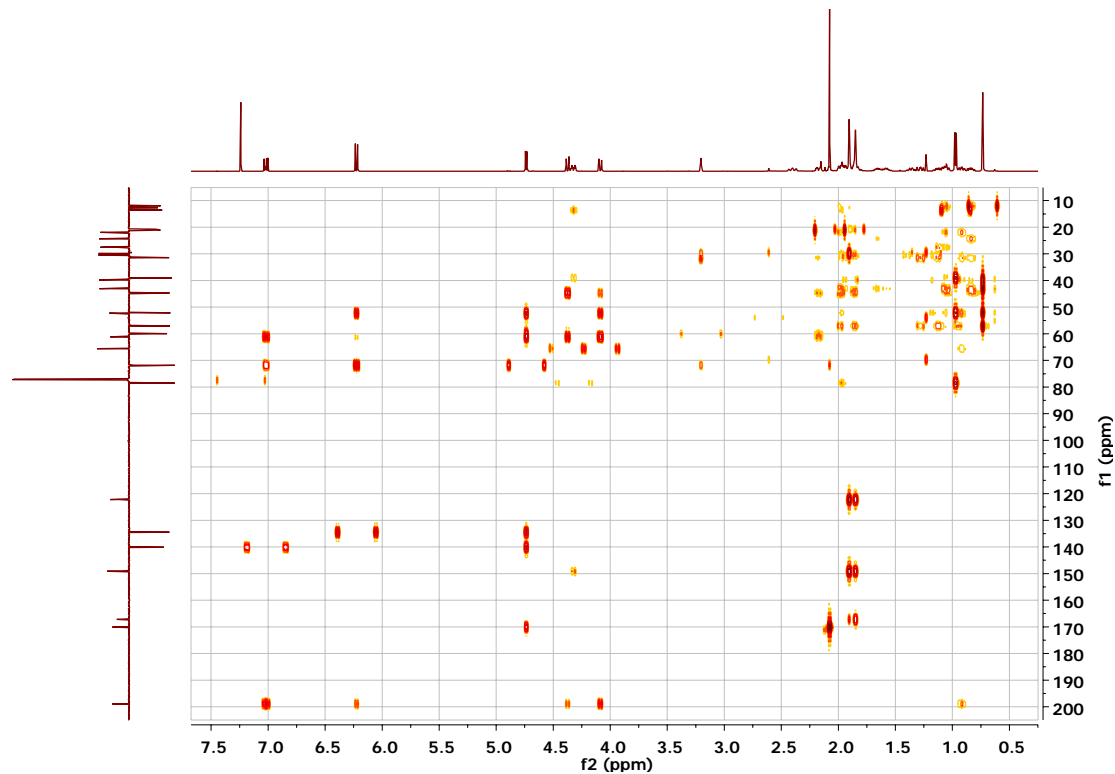

S3(a) <sup>1</sup>H NMR spectrum of withalongolide C (3) in CDCl<sub>3</sub> (400 MHz)

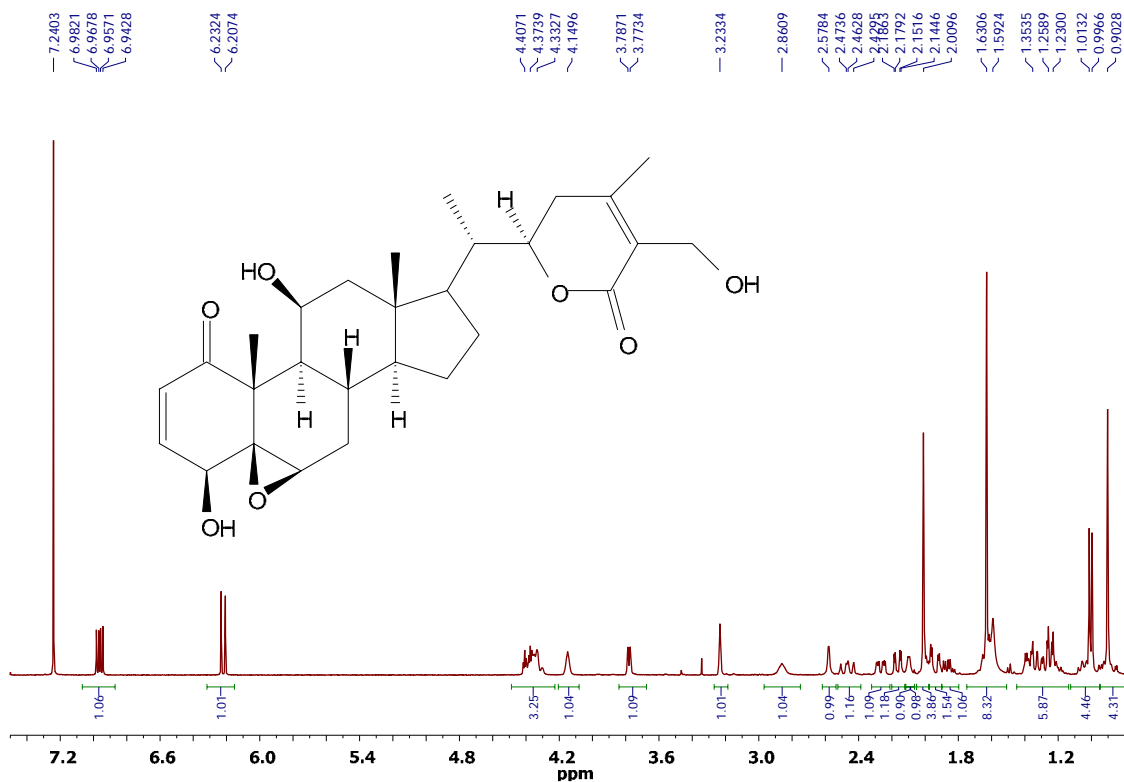

S3(b)  $^{13}\text{C}$  APT spectrum of withalongolide C (**3**) (125 MHz)

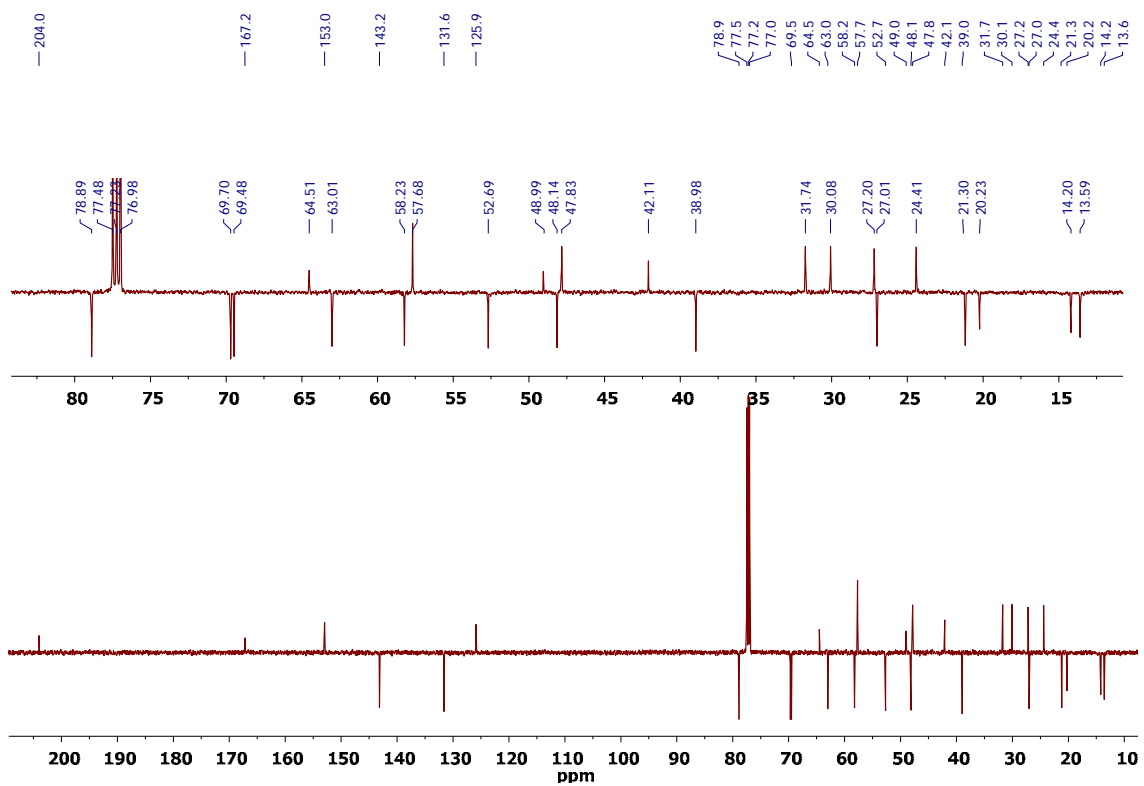

S3(c)  $^1\text{H}$ - $^1\text{H}$  COSY spectrum of withalongolide C (**3**)

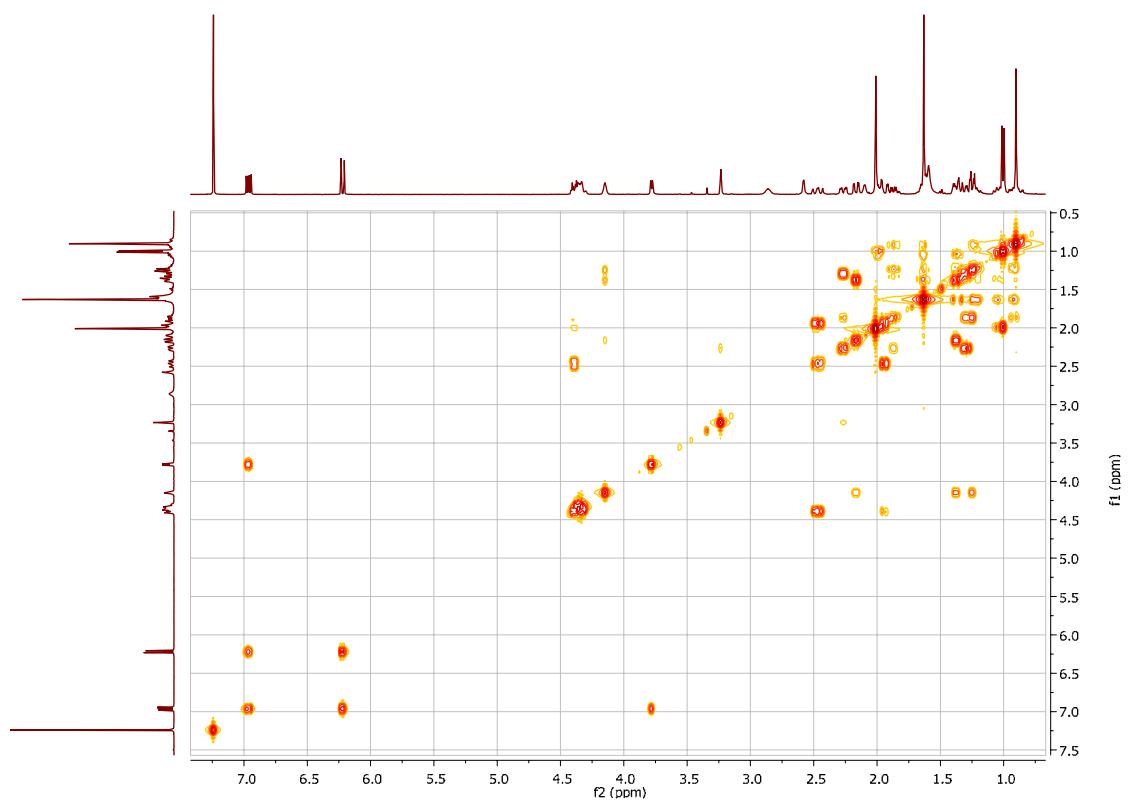

S3(d) HSQC spectrum of withalongolide C (3)

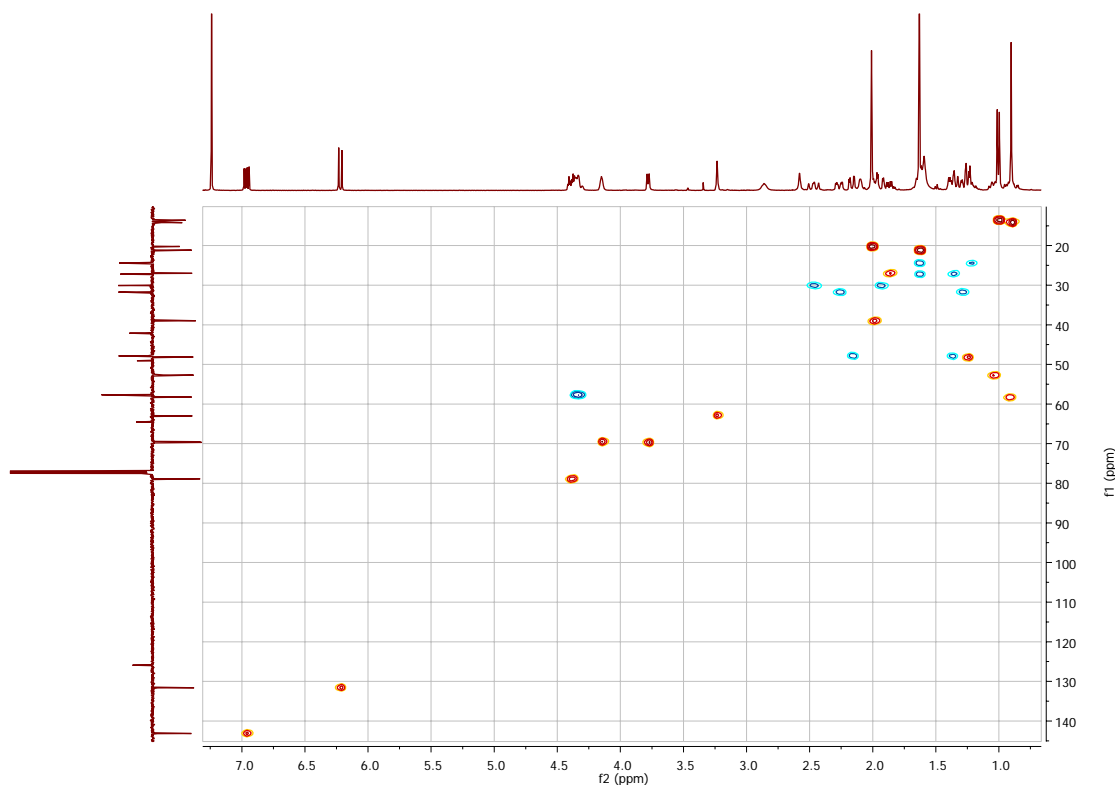

S3(e) HMBC spectrum of withalongolide C (3)

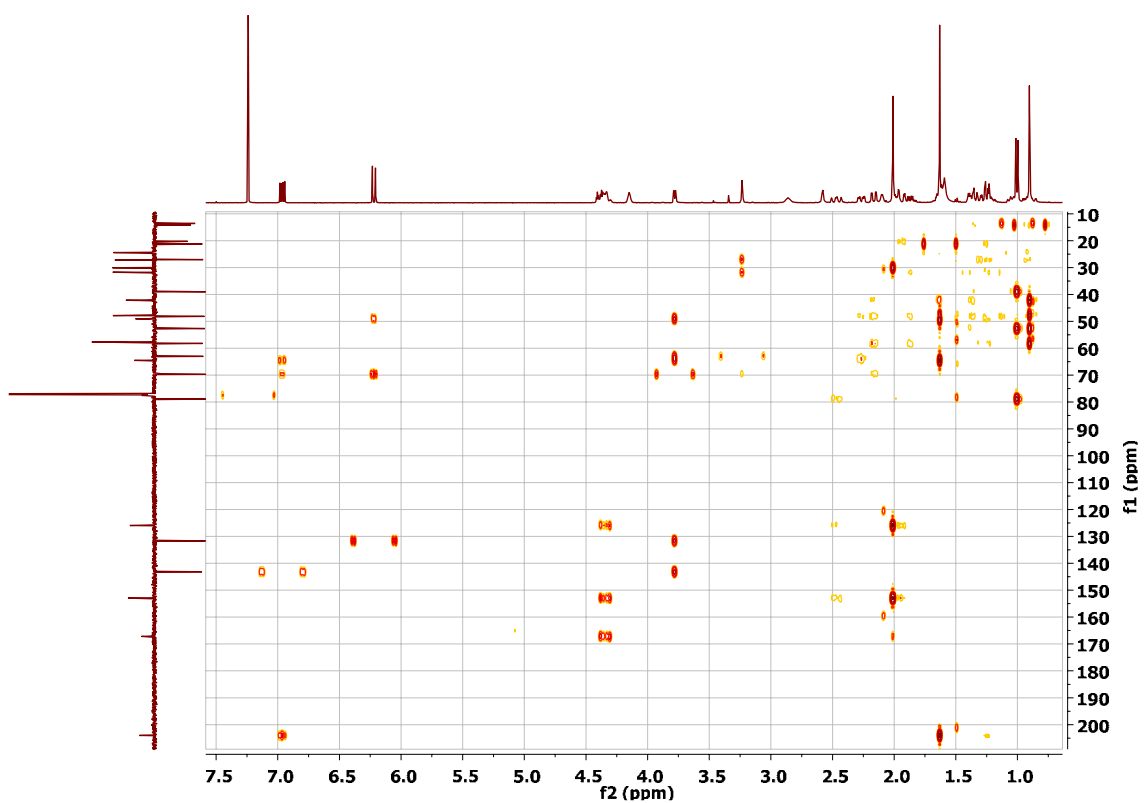

S3(f) NOESY spectrum of withalongolide C (3)

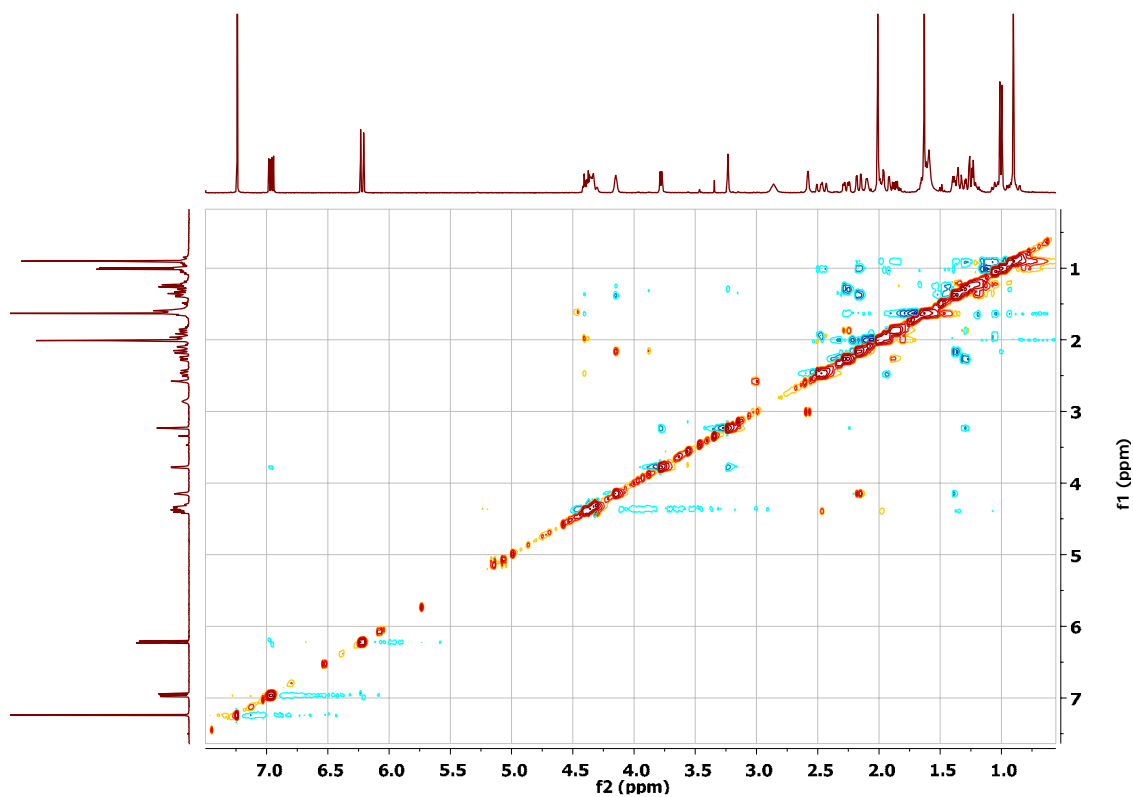

S4(a) <sup>1</sup>H NMR spectrum of withalongolide D (4) in CDCl<sub>3</sub> (400 MHz)

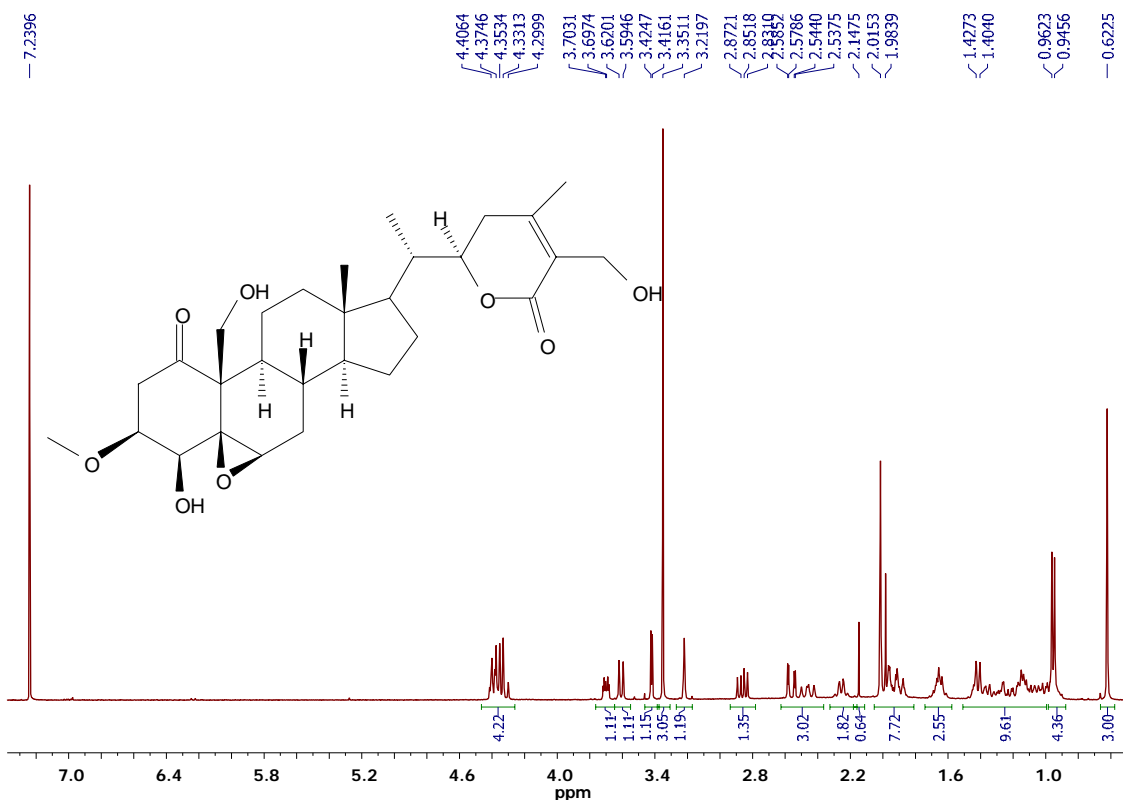

S4(b)  $^{13}\text{C}$  APT spectrum of withalongolide D (**4**) (125 MHz)

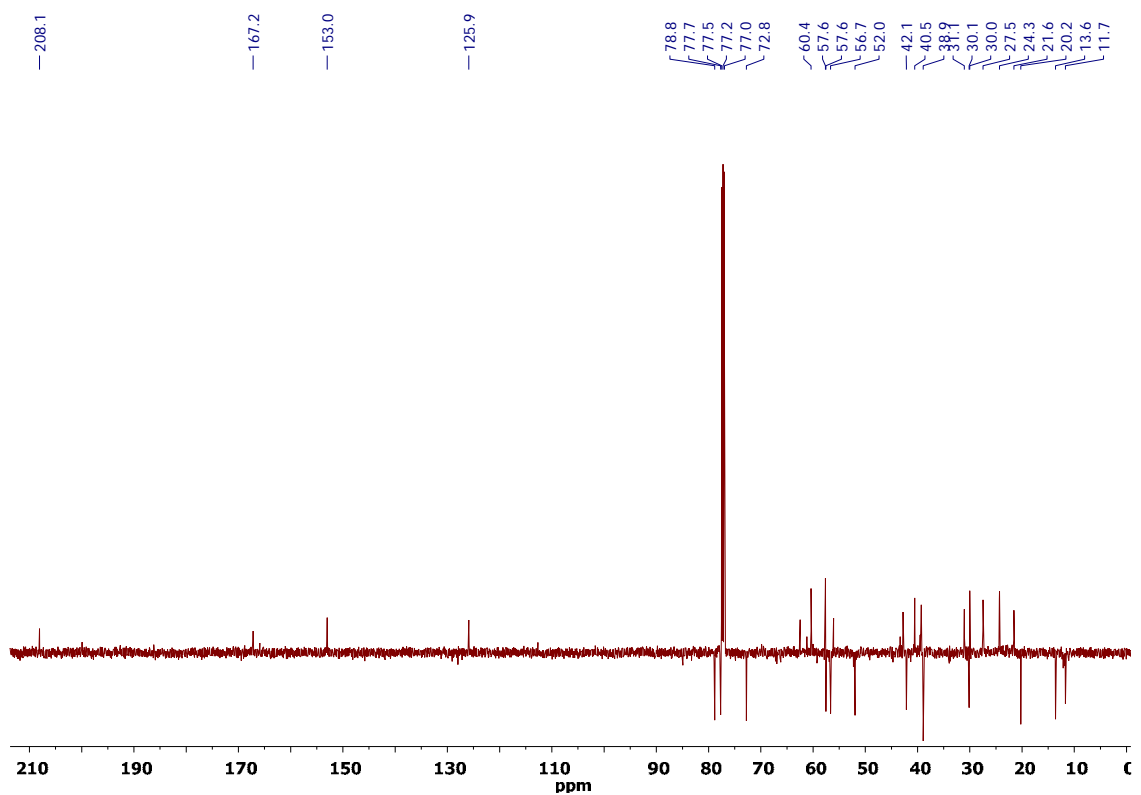

S4(c)  $^1\text{H}$ - $^1\text{H}$  COSY spectrum of withalongolide D (**4**)

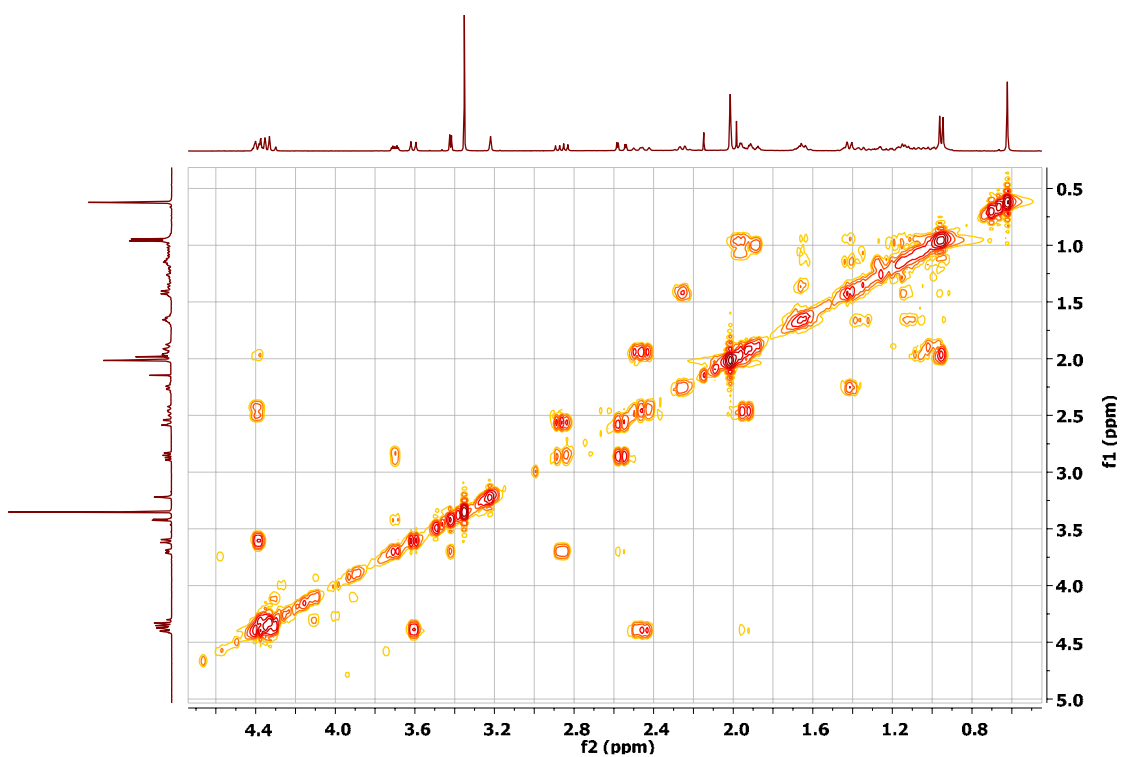



S4(d) HSQC spectrum of withalongolide D (4)

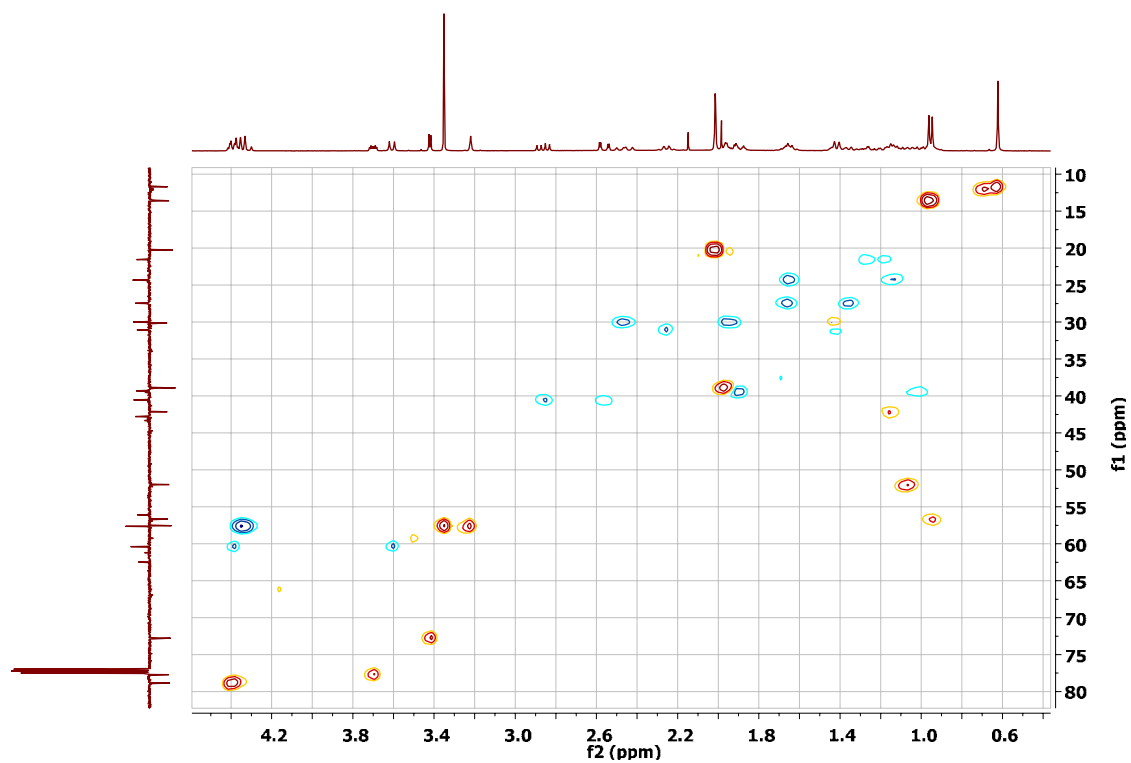

S4(e) HMBC spectrum of withalongolide D (4)

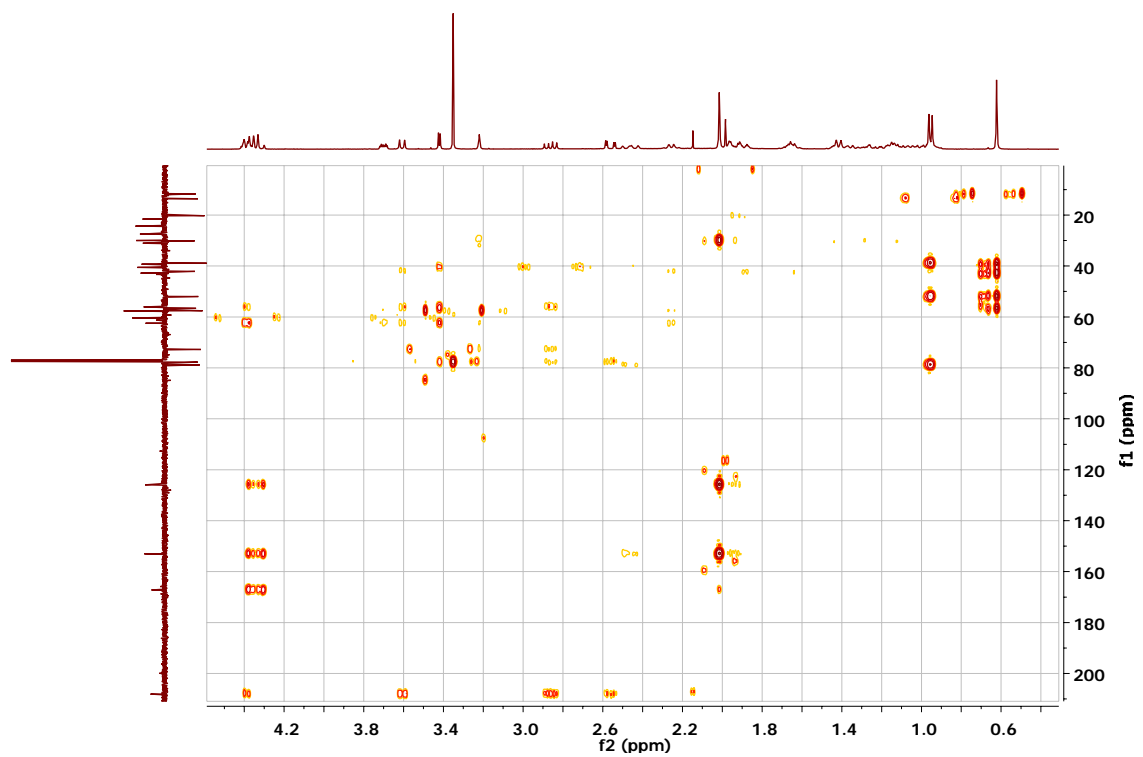

S4(f) NOESY spectrum of withalongolide D (**4**)

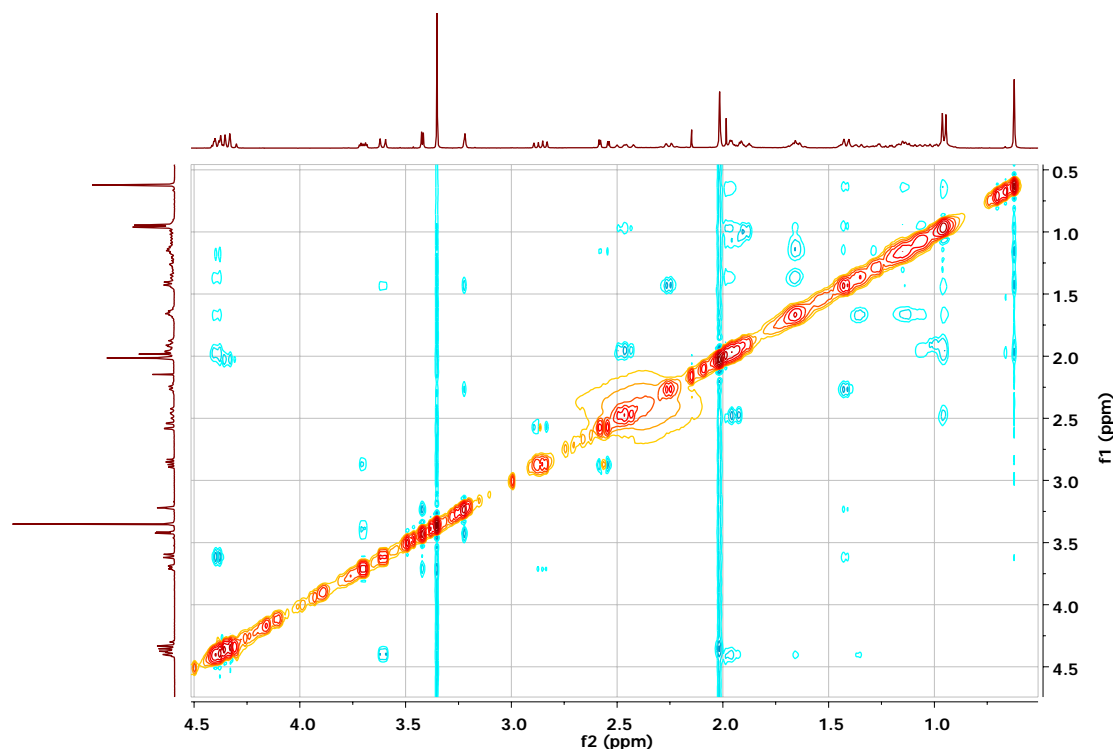

S5(a)  $^1\text{H}$  NMR spectrum of withalongolide E (**5**) in  $\text{CDCl}_3$  (500 MHz)

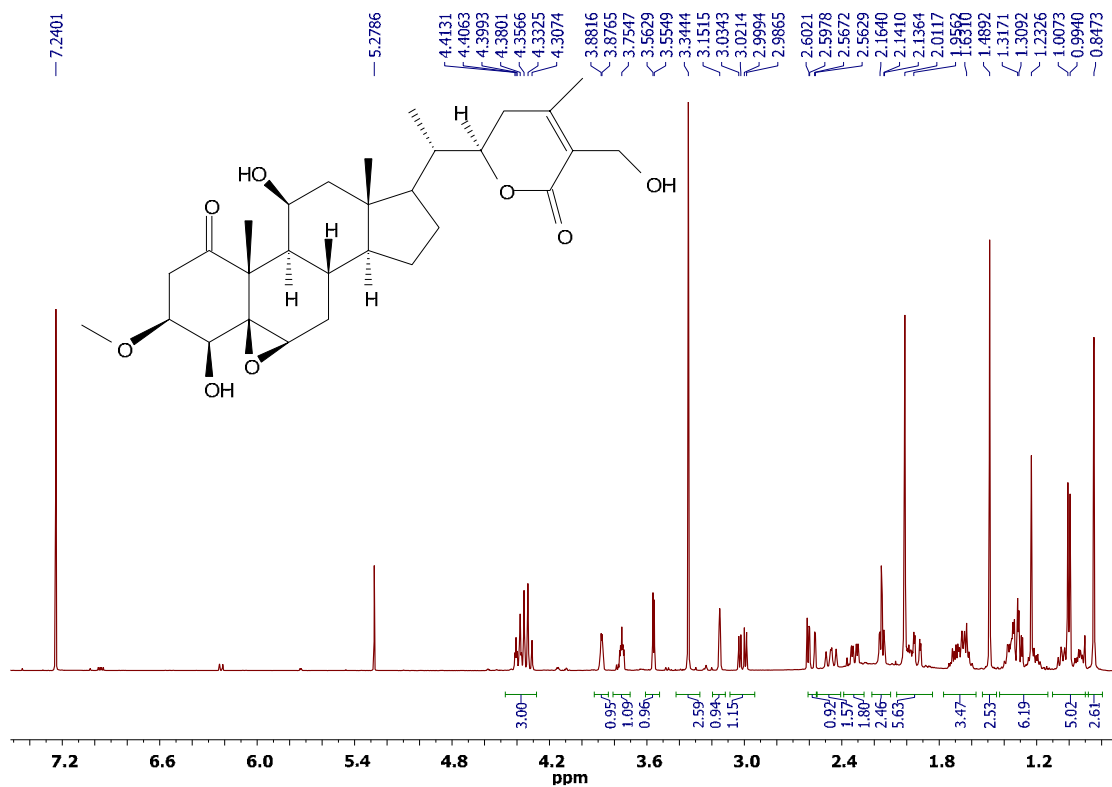

S5(b)  $^{13}\text{C}$  APT spectrum of withalongolide E (**5**) (125 MHz)

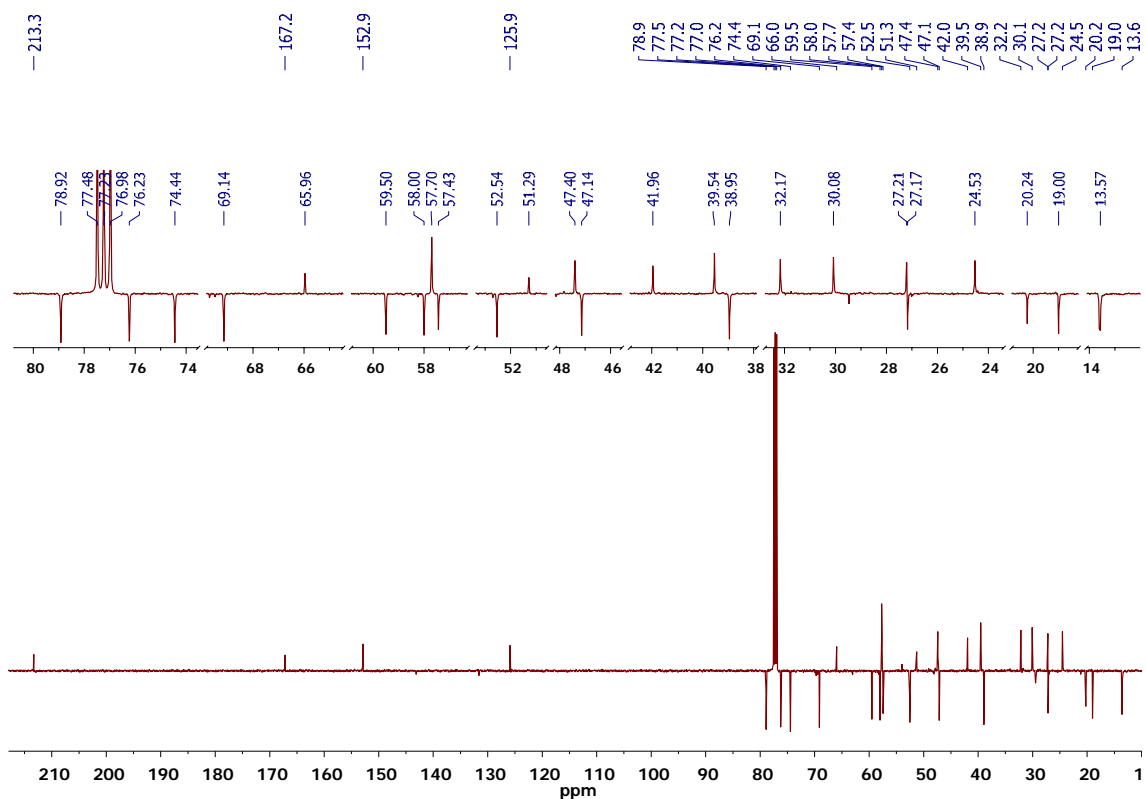

S5(c)  $^1\text{H}$ - $^1\text{H}$  COSY spectrum of withalongolide E (**5**)

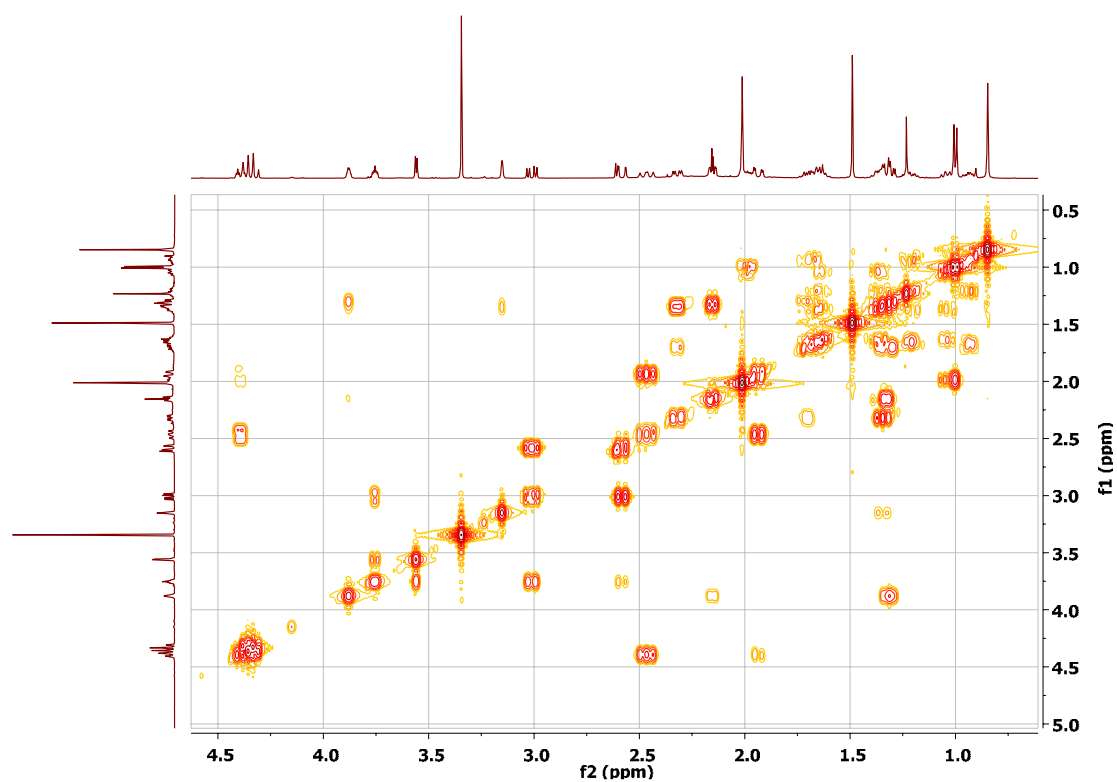

S5(d) HSQC spectrum of withalongolide E (5)

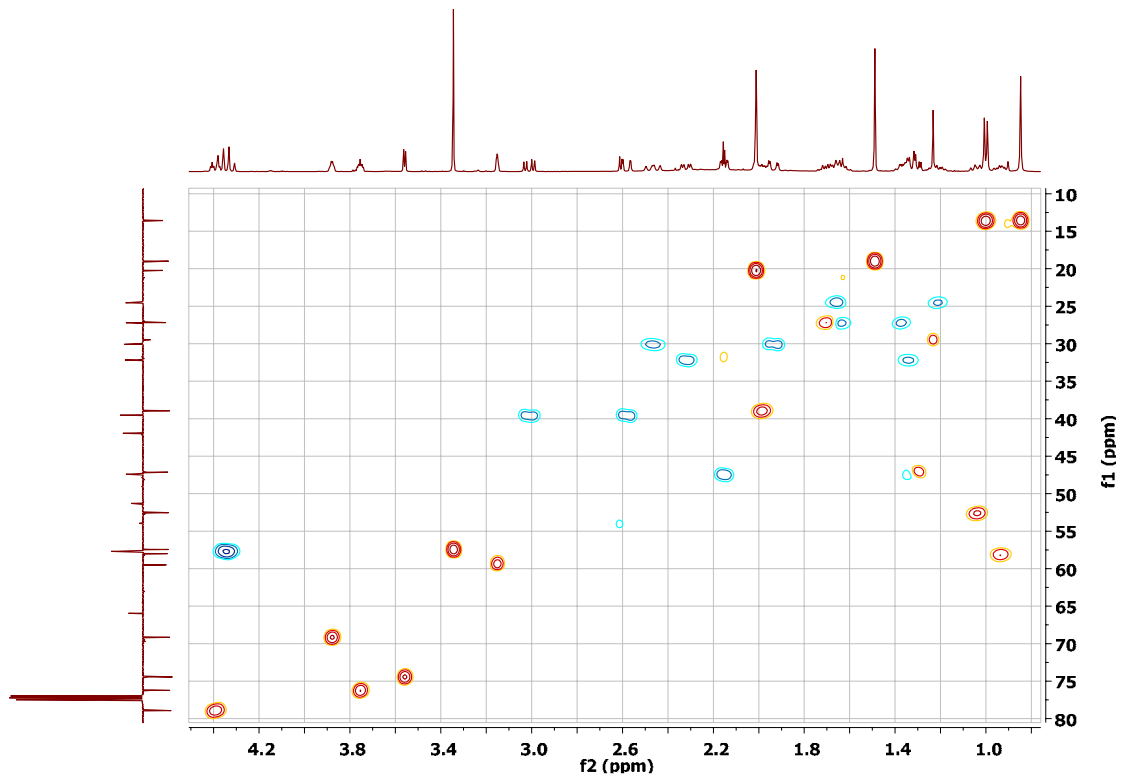

S5(e) HMBC spectrum of withalongolide E (5)

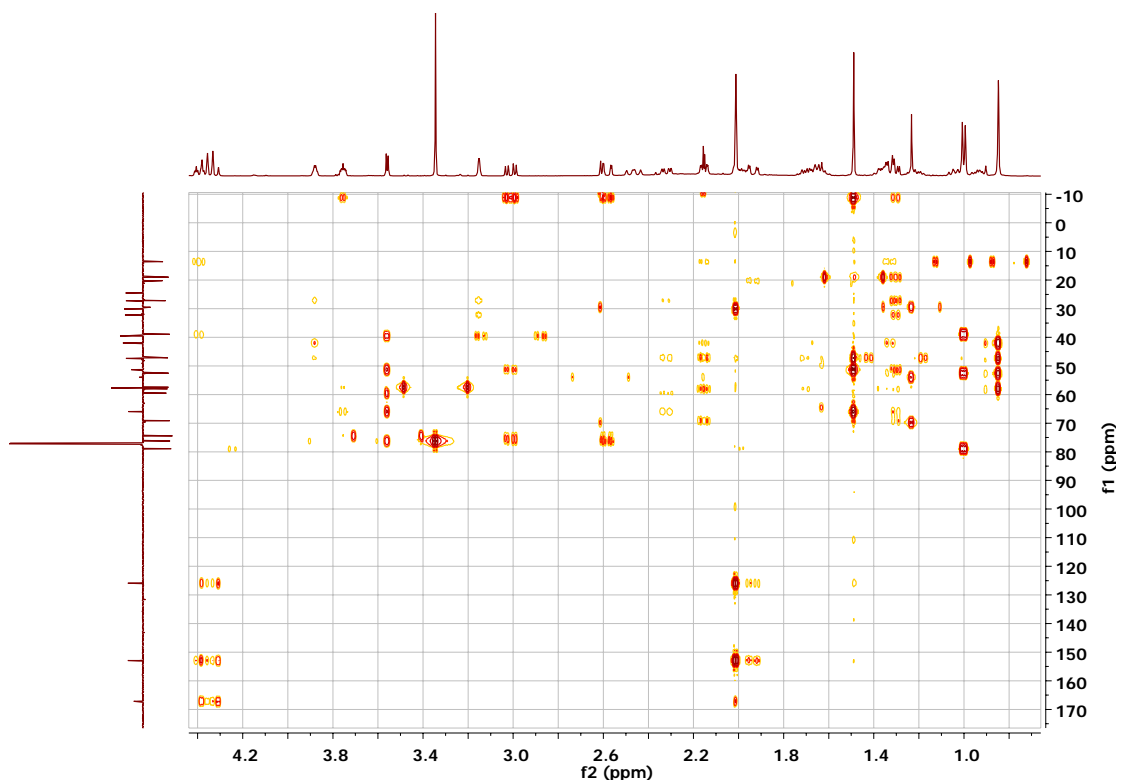

S5(f) NOESY spectrum of withalongolide E (5)

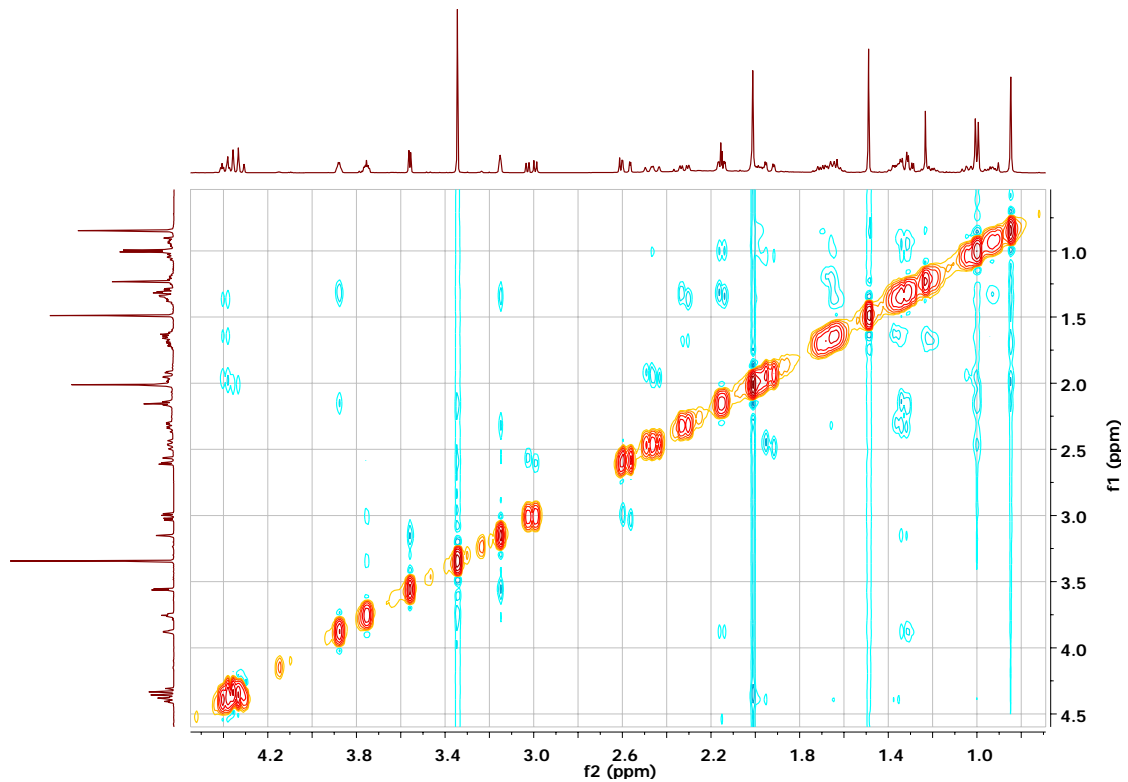

S6(a) <sup>1</sup>H NMR spectrum of withalongolide F (6) in CDCl<sub>3</sub> (400 MHz)

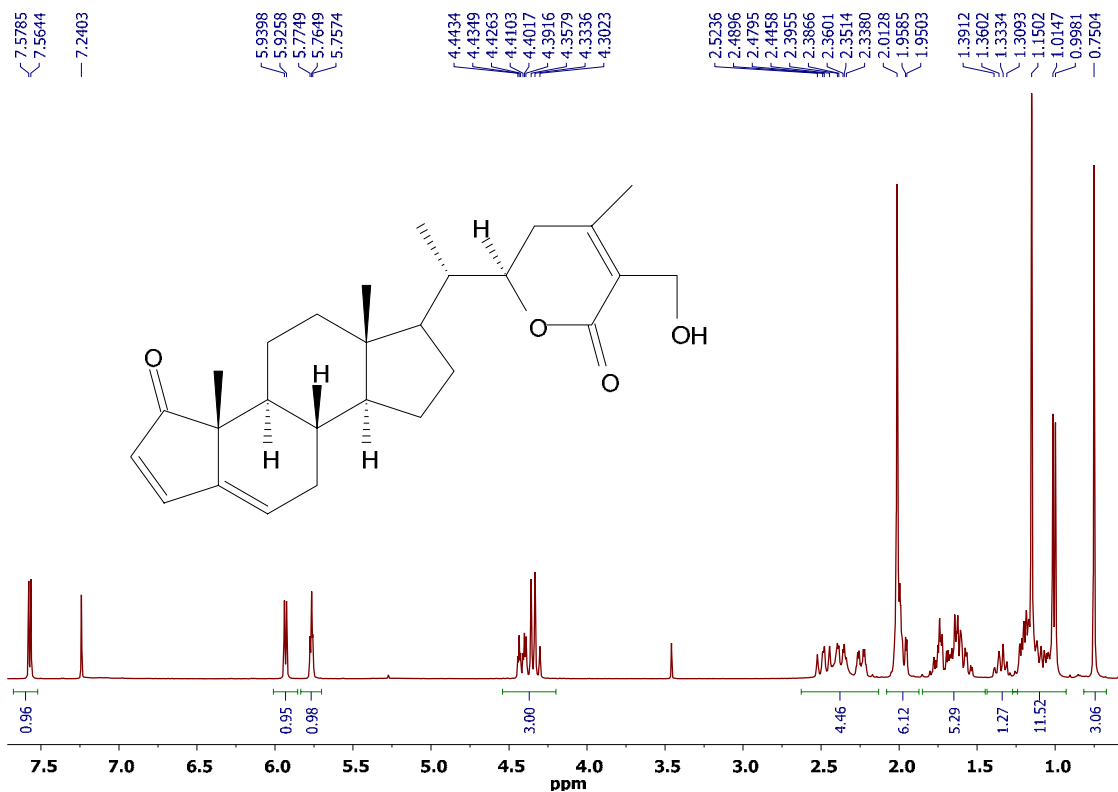

**S6(b)**  $^{13}\text{C}$  APT spectrum of withalongolide F(6) (125 MHz)

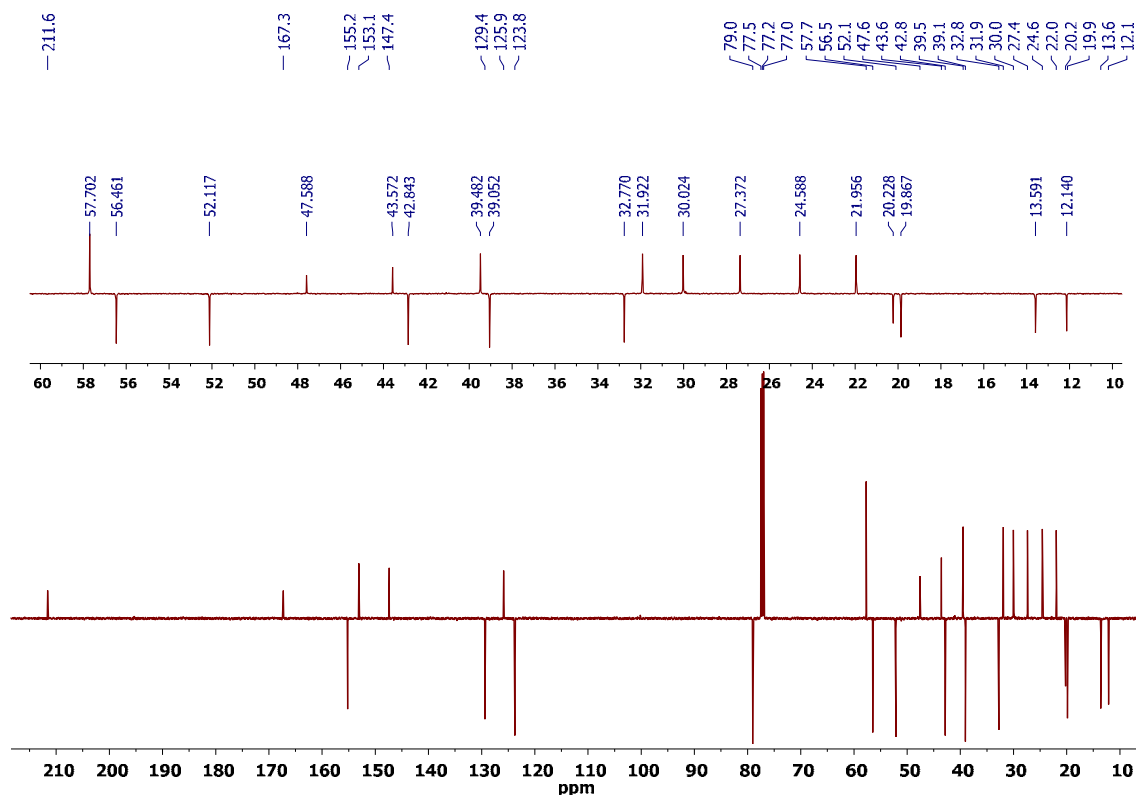

**S6(c)** DQF-COSY spectrum of withalongolide F (6)

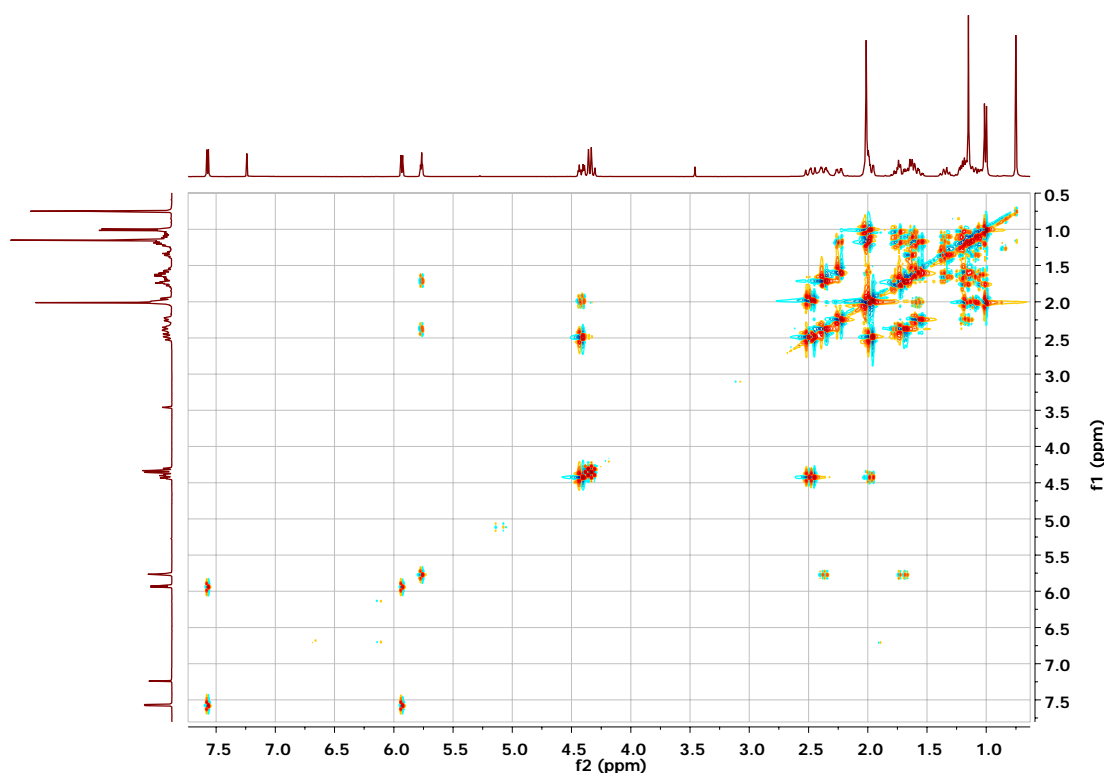

S6(d) HSQC spectrum of withalongolide F (6)

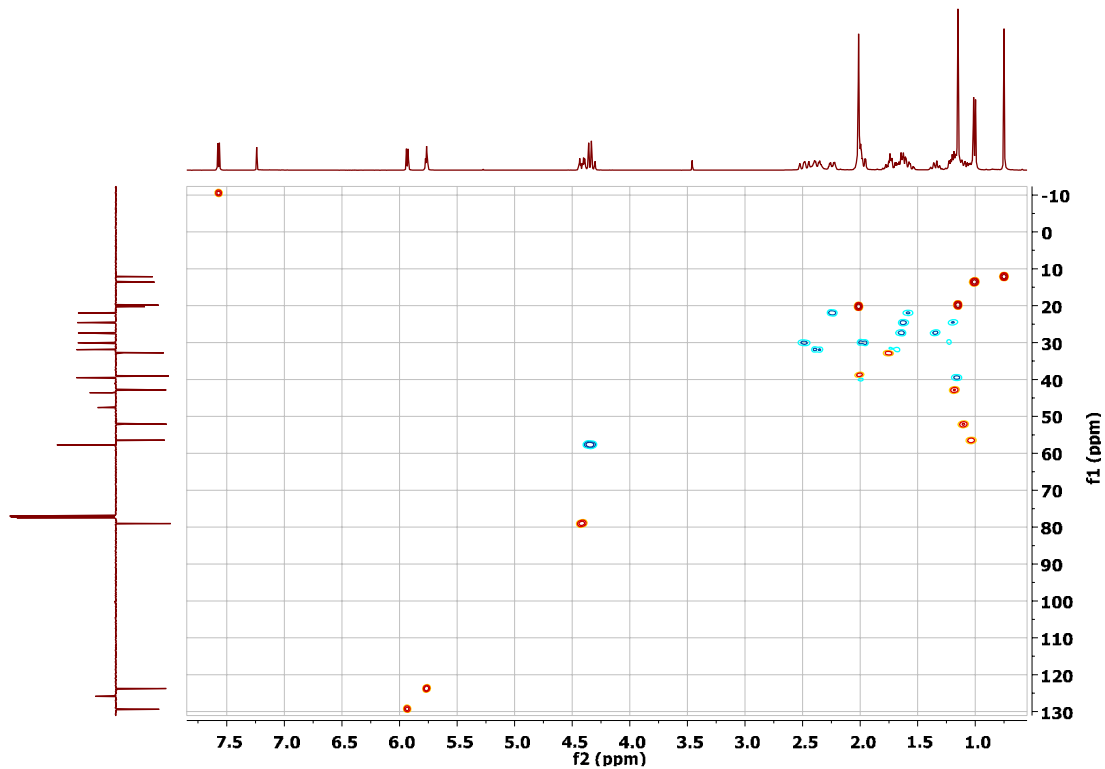

S6(e) HMBC spectrum of withalongolide F (6)

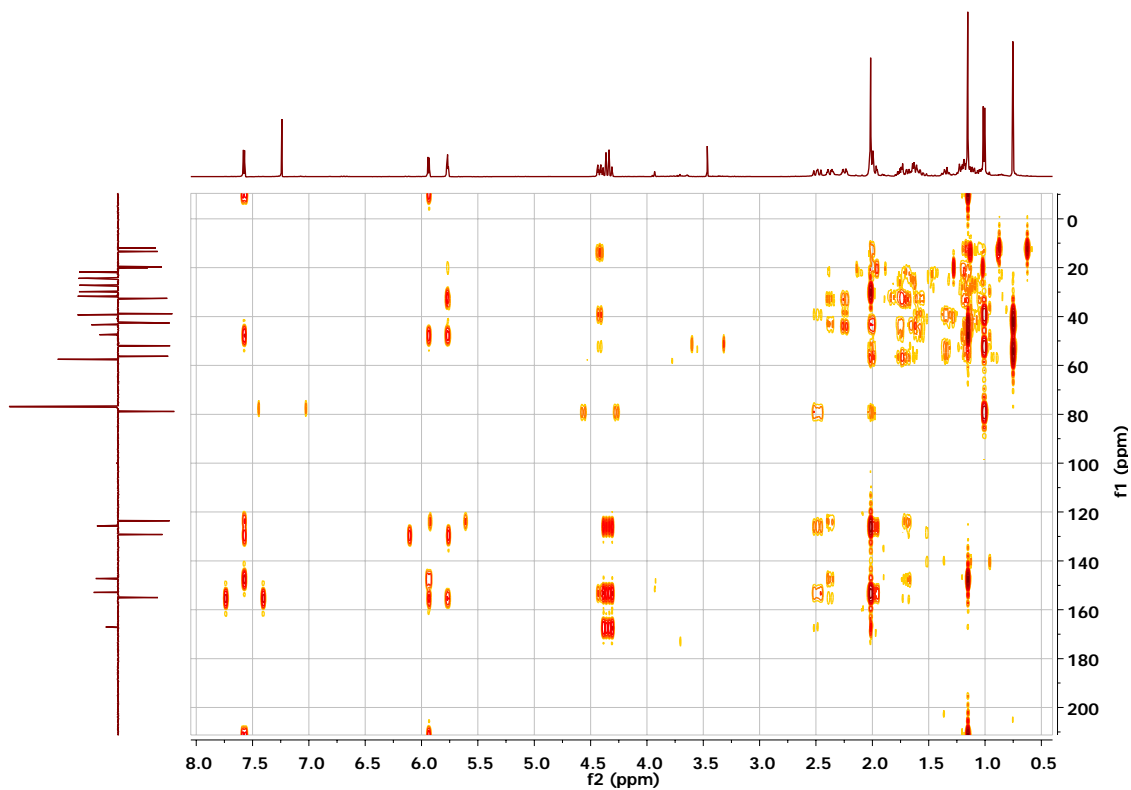

S6(f) NOESY spectrum of withalongolide F (6)

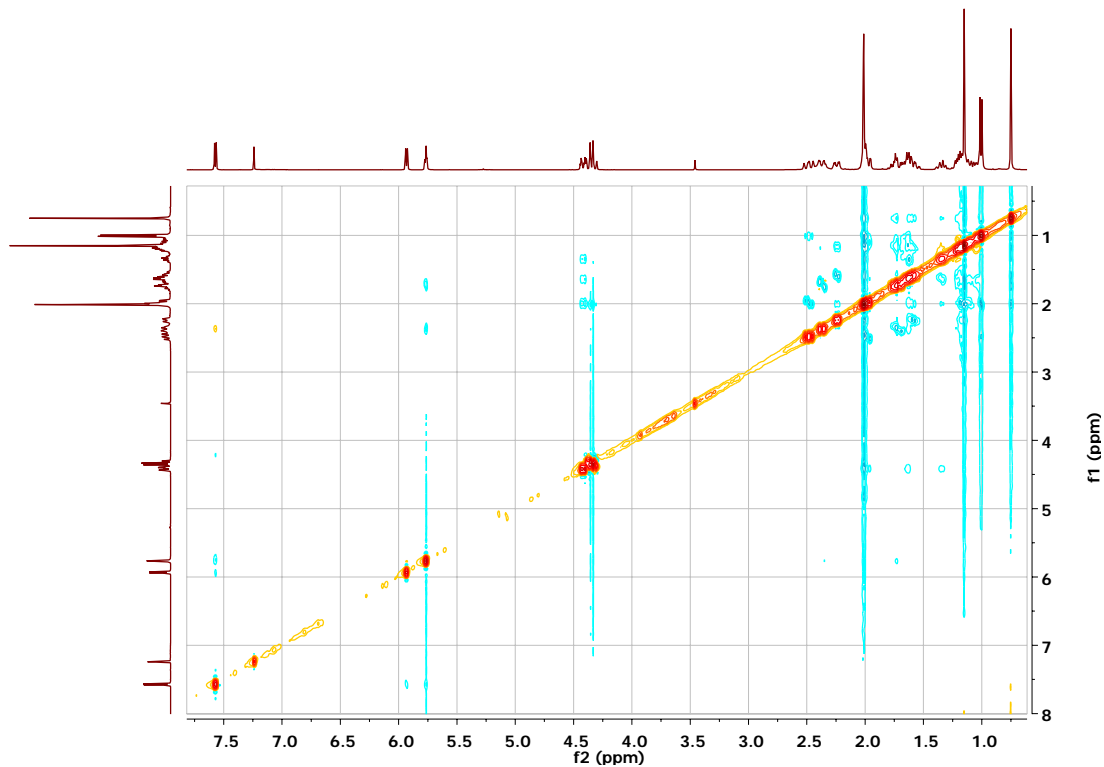

S7(a)  $^1\text{H}$  NMR spectrum of withalongolide G (7) in  $\text{C}_5\text{D}_5\text{N}$  (500 MHz)

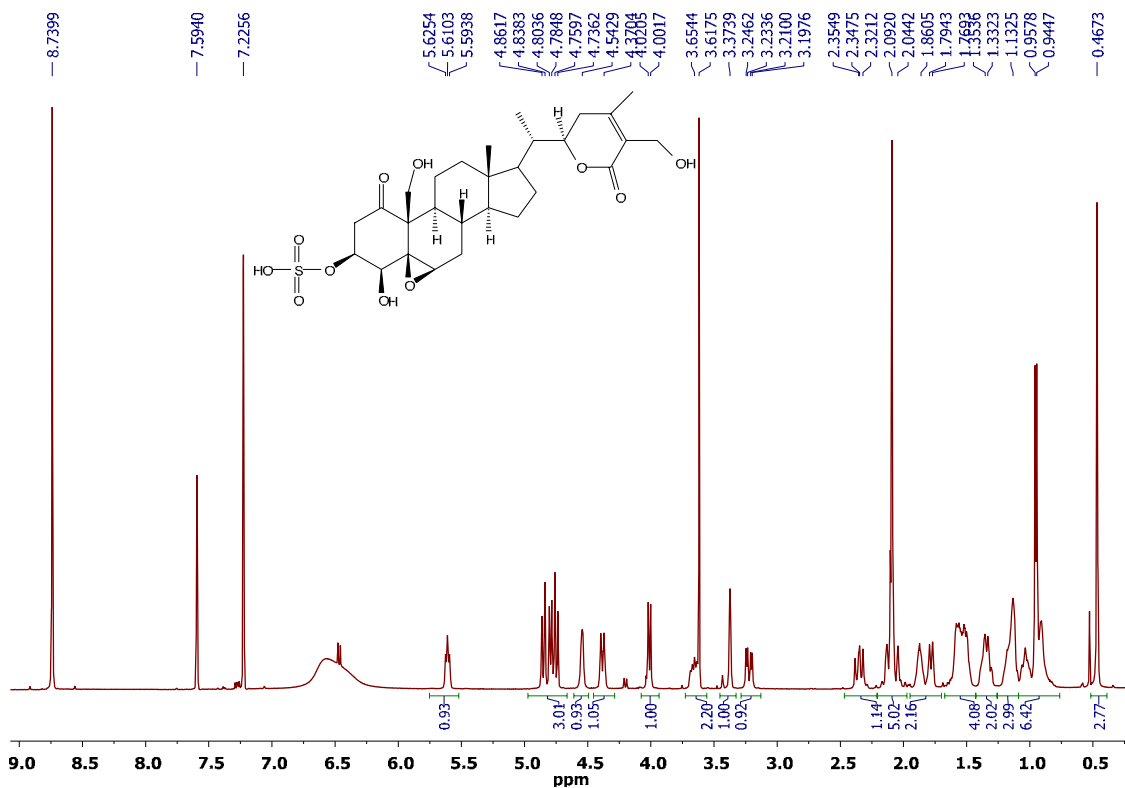



S7(b)  $^{13}\text{C}$  APT spectrum of withalongolide G (7) (125 MHz)

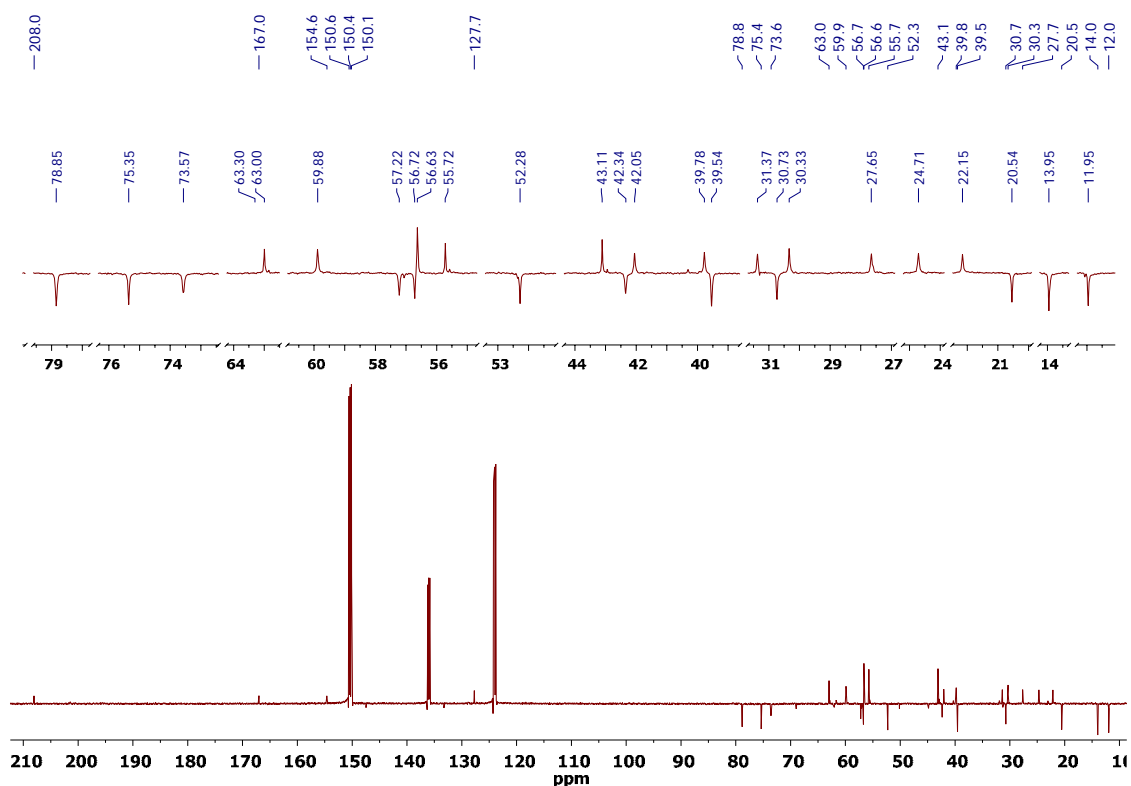

S7(c)  $^1\text{H}$ - $^1\text{H}$  COSY spectrum of withalongolide G (7)

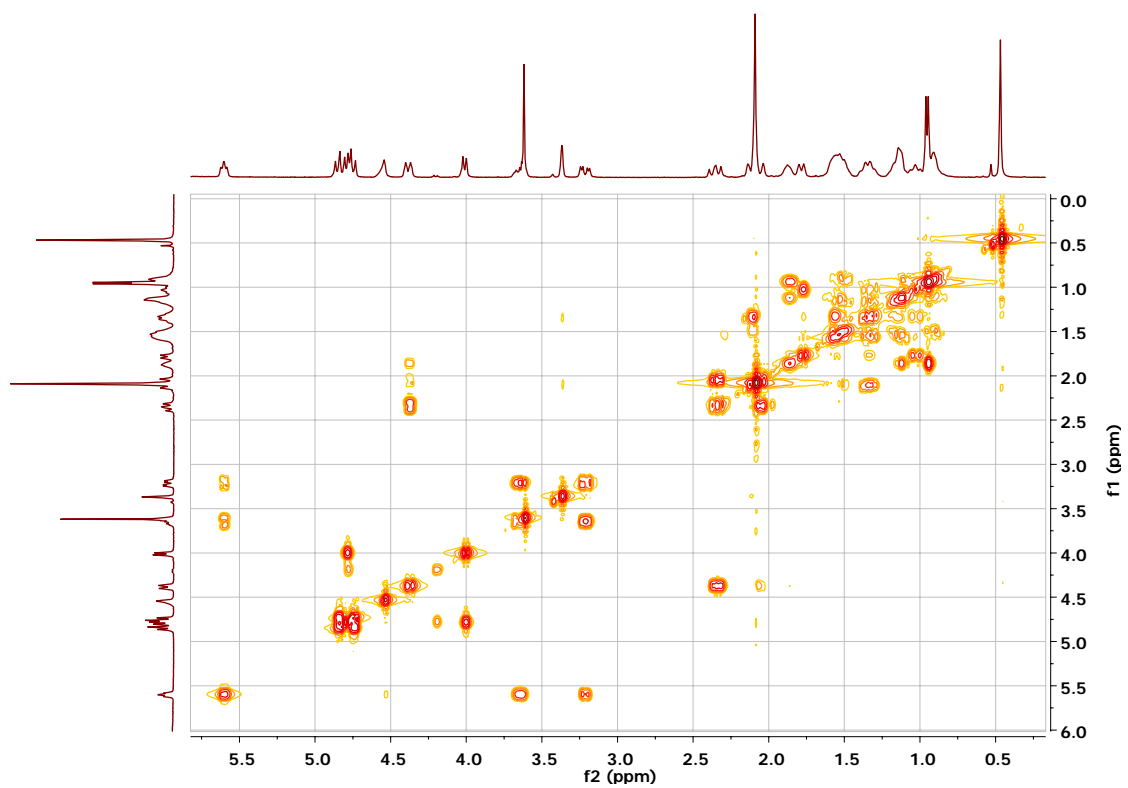

S7(d) HSQC spectrum of withalongolide G (7)

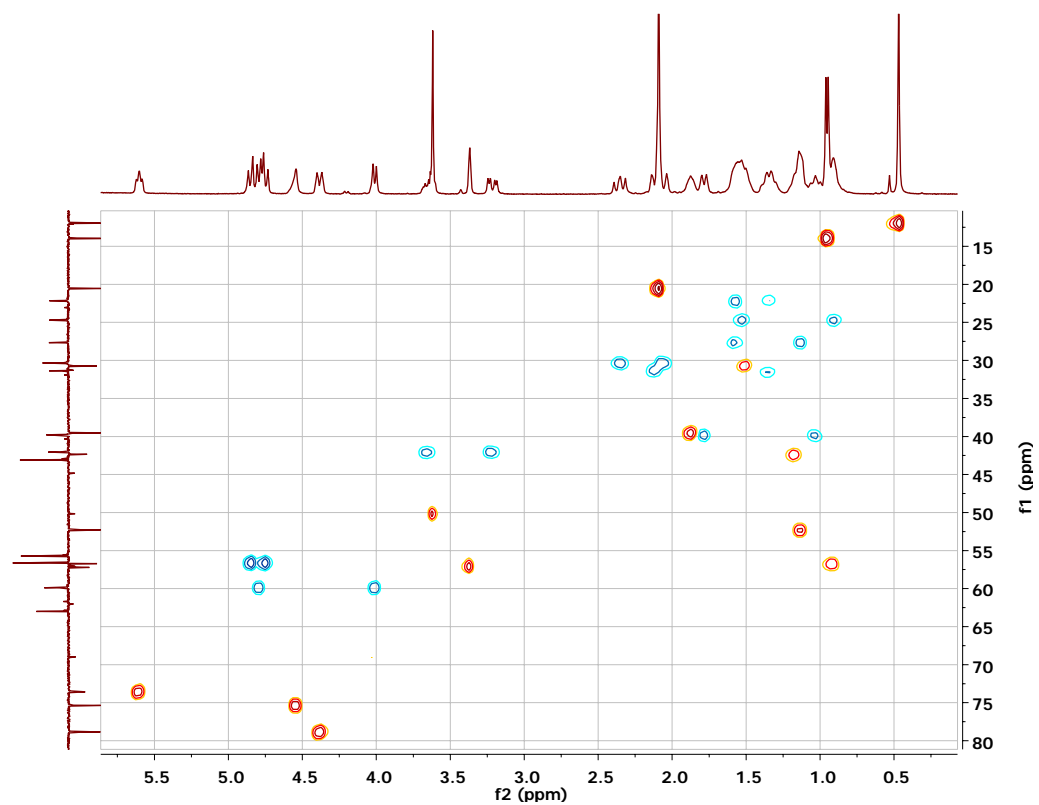

S7(e) HMBC spectrum of withalongolide G (7)

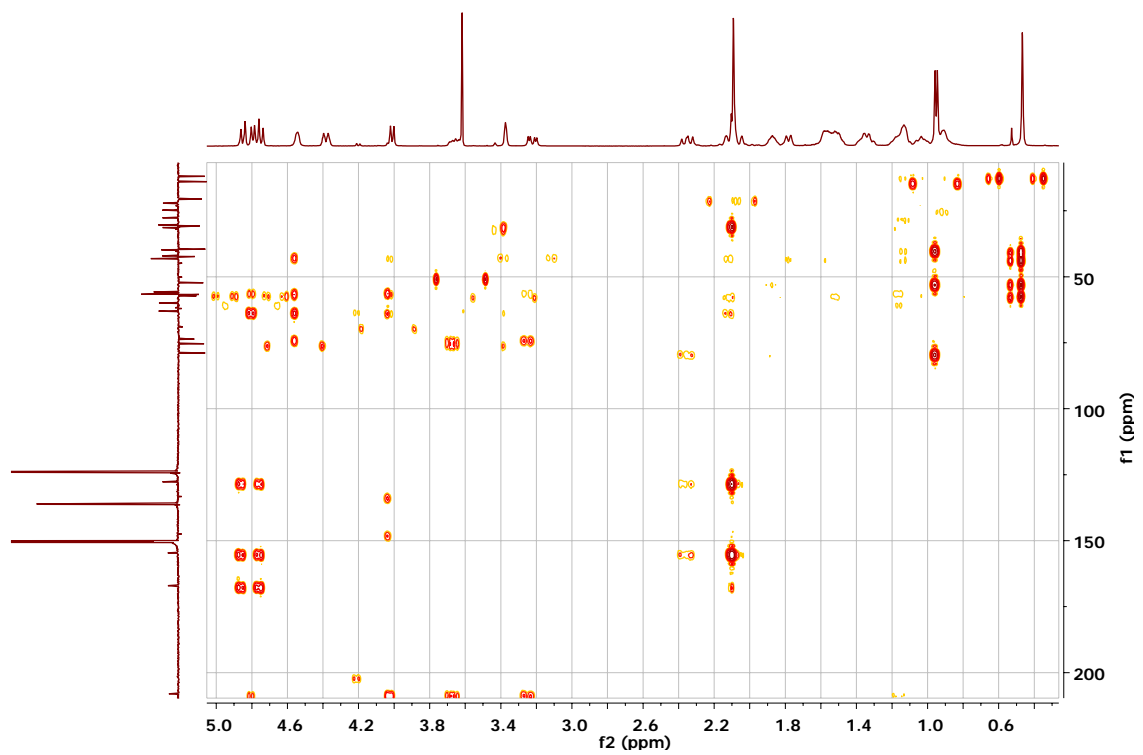

S7(f) NOESY spectrum of withalongolide G (7)

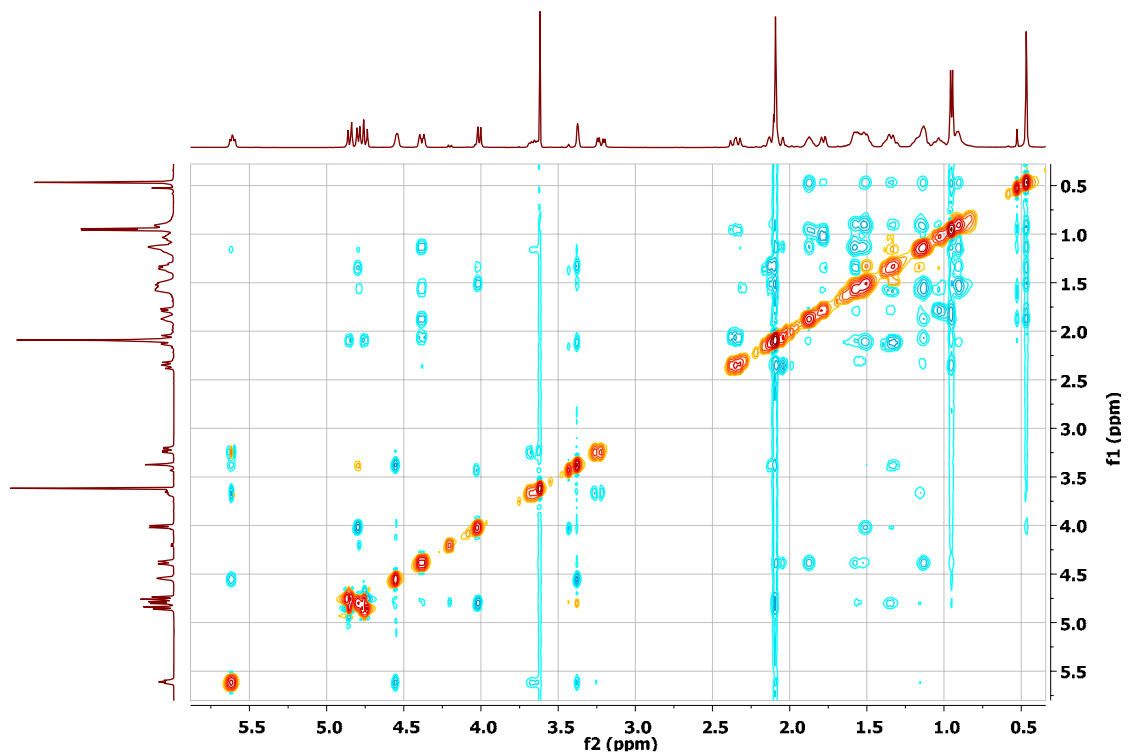

S8(a)  $^1\text{H}$  NMR spectrum of withalongolide H (8) in  $\text{C}_5\text{D}_5\text{N}$  (500 MHz)

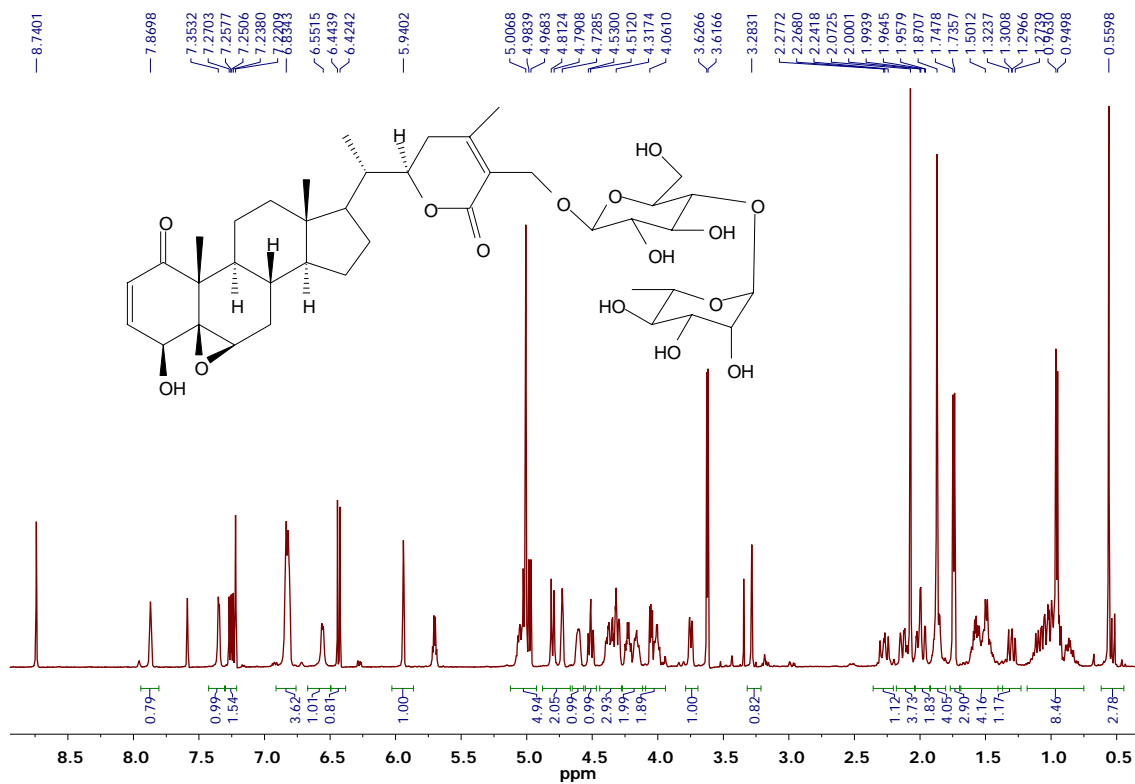

S8(b)  $^{13}\text{C}$  APT spectrum of withalongolide H (**8**) (125 MHz)

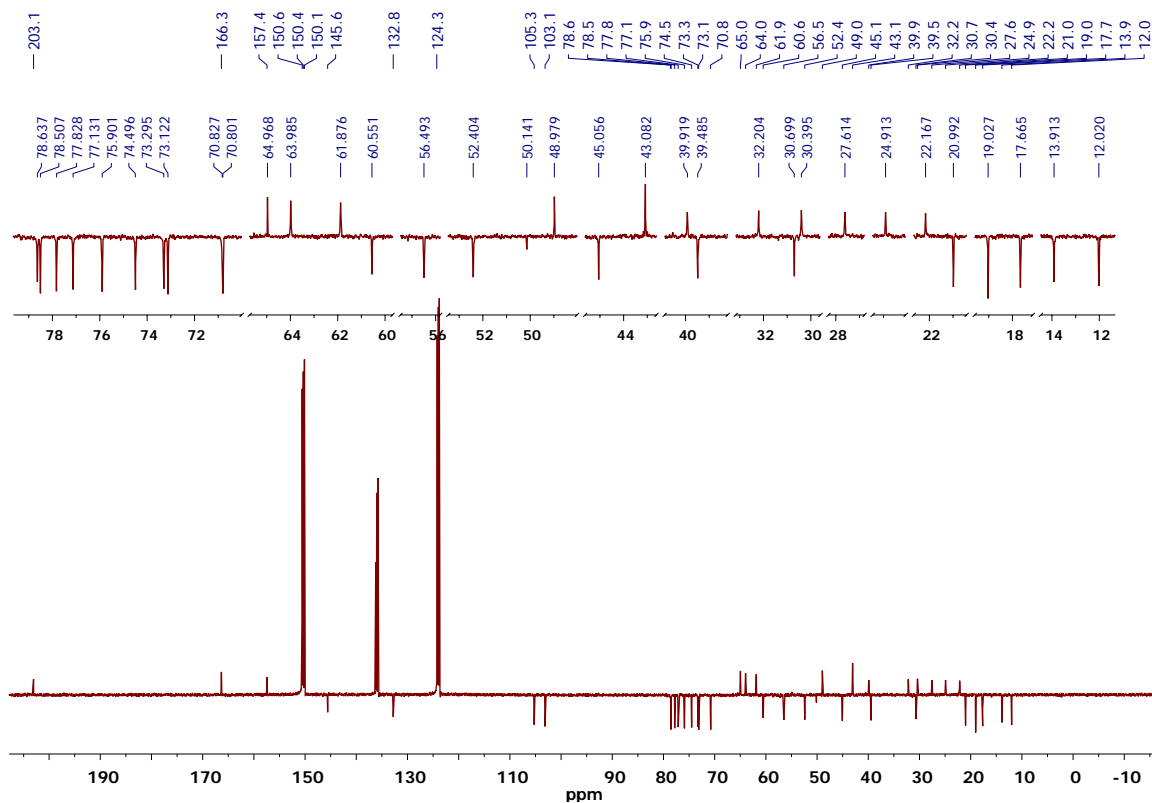

S8(c)  $^1\text{H}$ - $^1\text{H}$  COSY spectrum of withalongolide H (**8**)

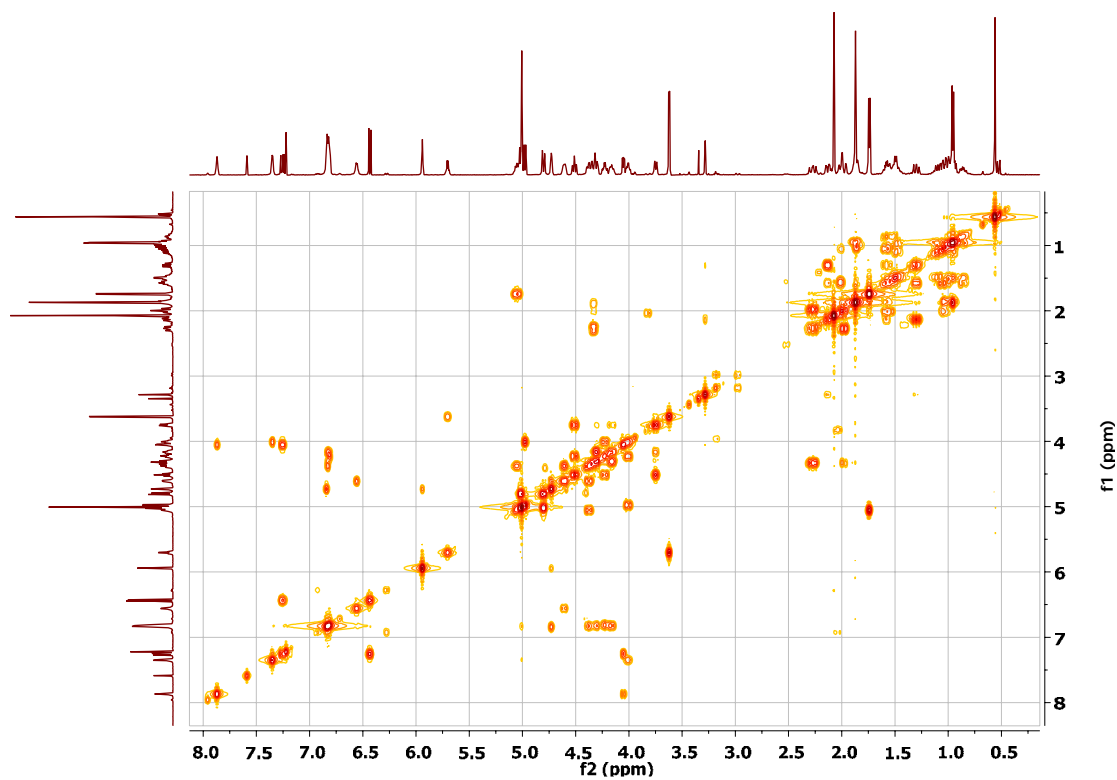

S8(d) HSQC spectrum of withalongolide H (8)

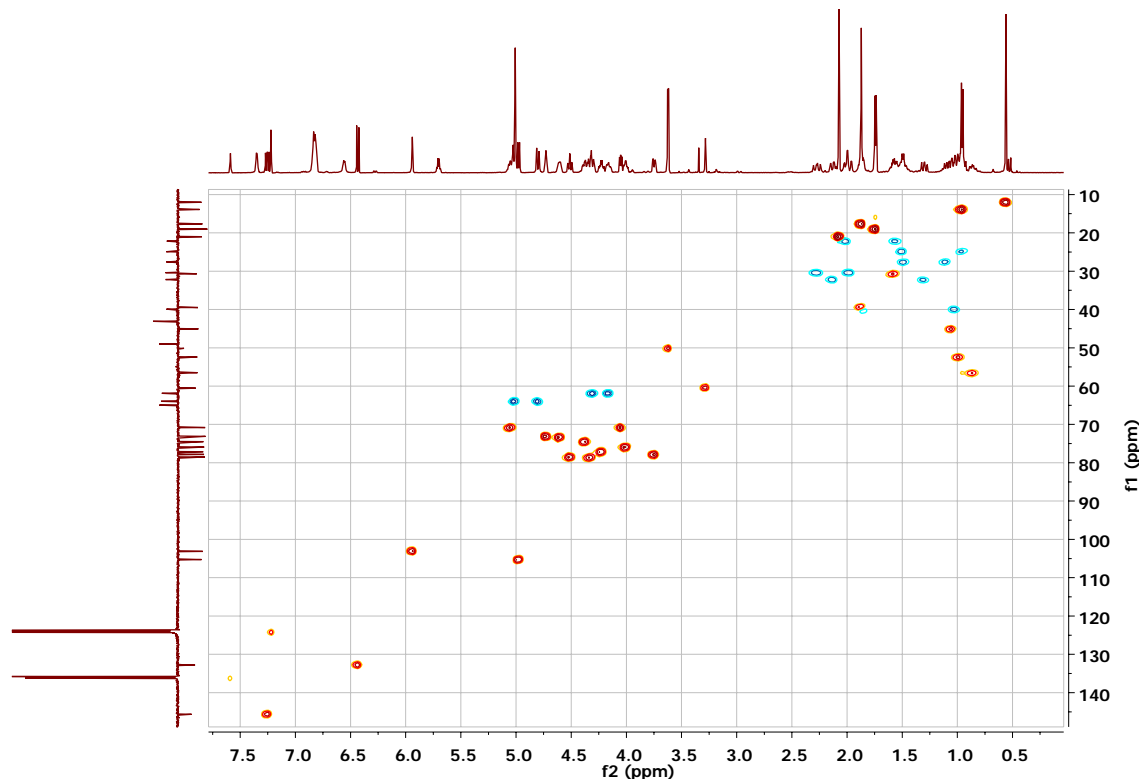

S8(e) HMBC spectrum of withalongolide H (8)

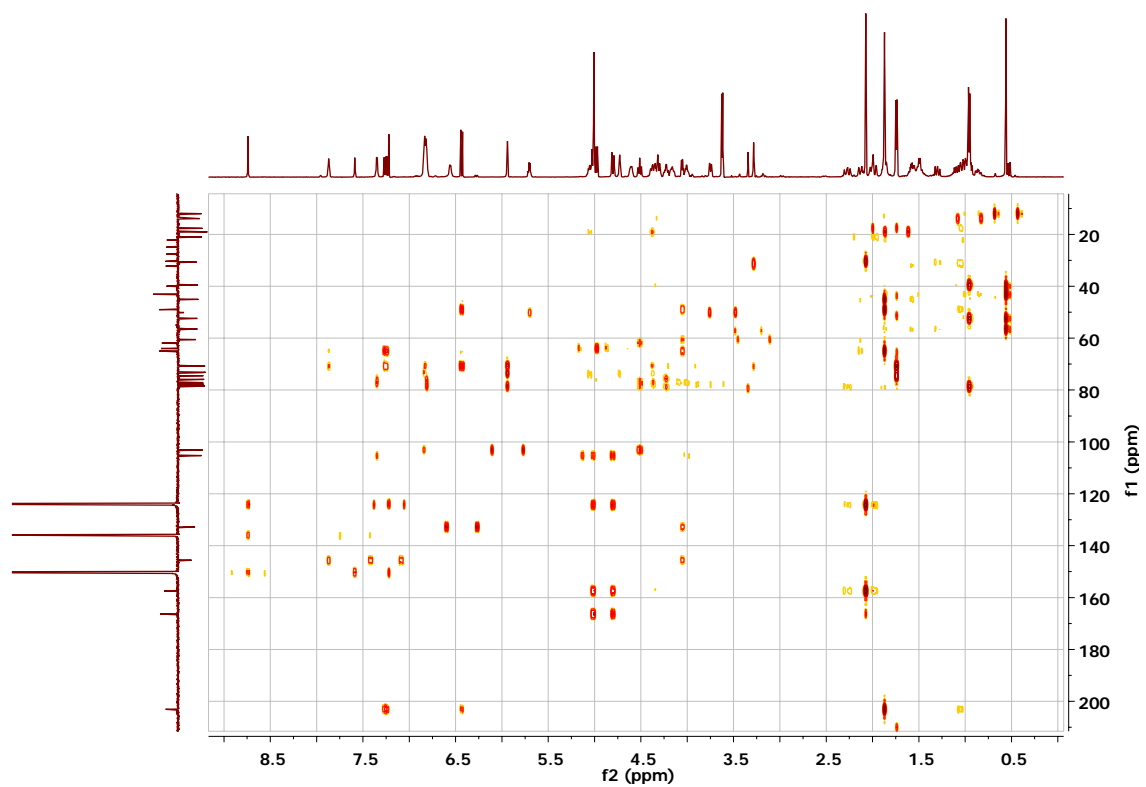

S8(f) NOESY spectrum of withalongolide H (8)

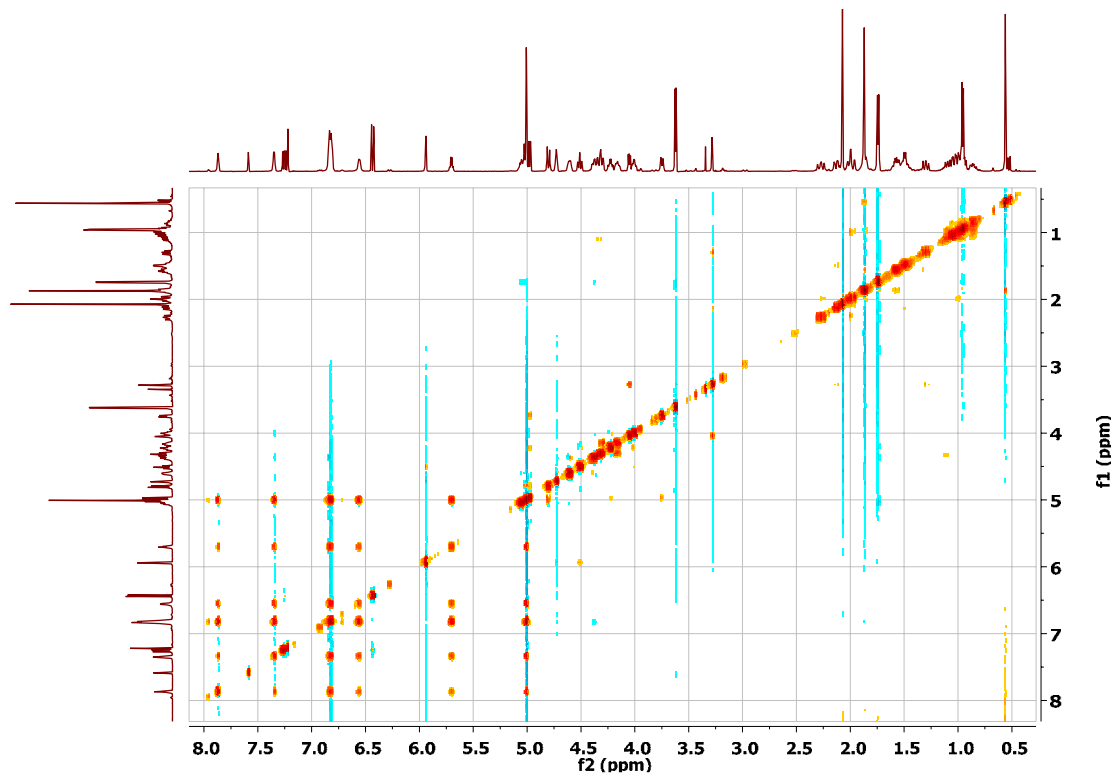

S9(a) <sup>1</sup>H NMR spectrum of withalongolide I (9) in C<sub>5</sub>D<sub>5</sub>N (500 MHz)

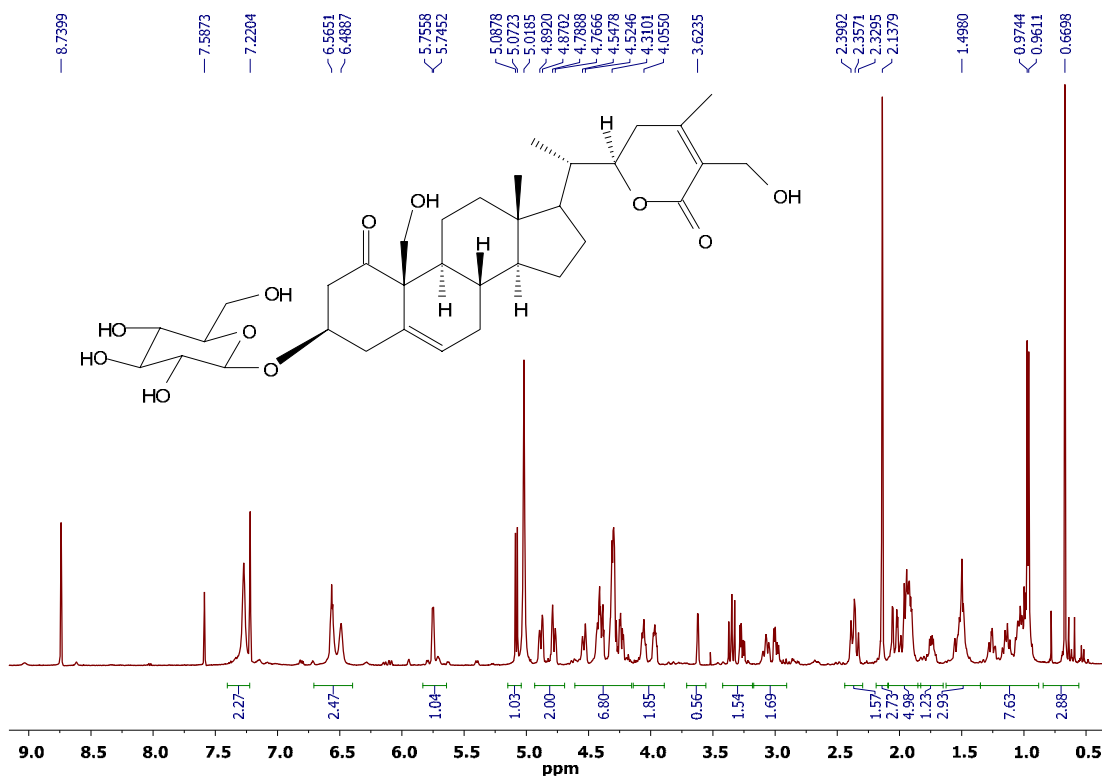

S9(b)  $^{13}\text{C}$  APT spectrum of withalongolide I (9) (125 MHz)

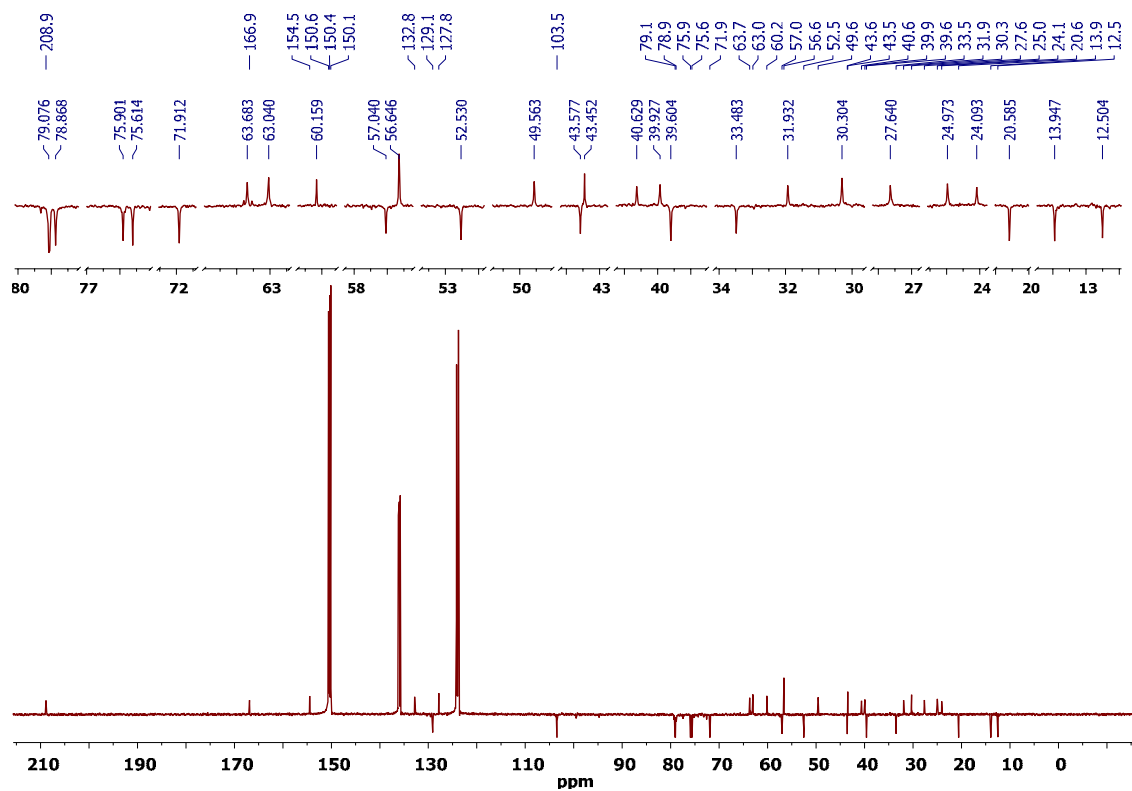

S9(c)  $^1\text{H}$ - $^1\text{H}$  COSY spectrum of withalongolide I (9)

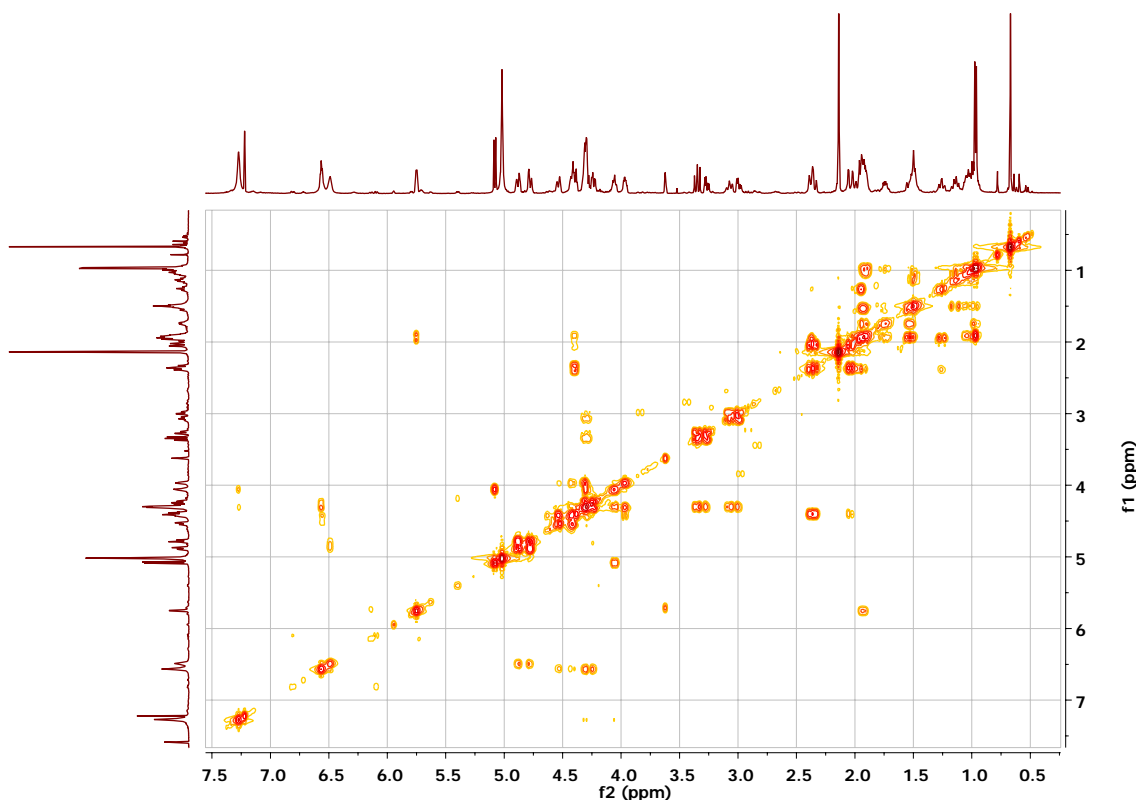

S9(d) HSQC spectrum of withalongolide I (9)

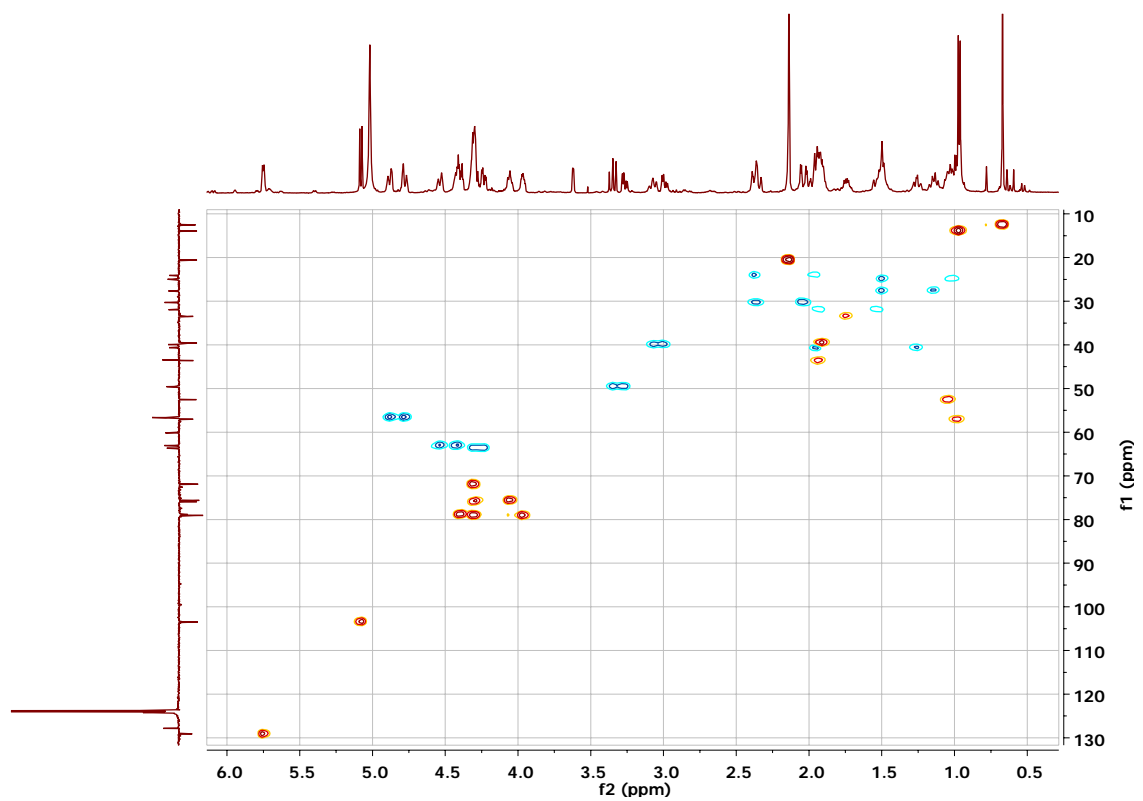

S9(e) HMBC spectrum of withalongolide I (9)

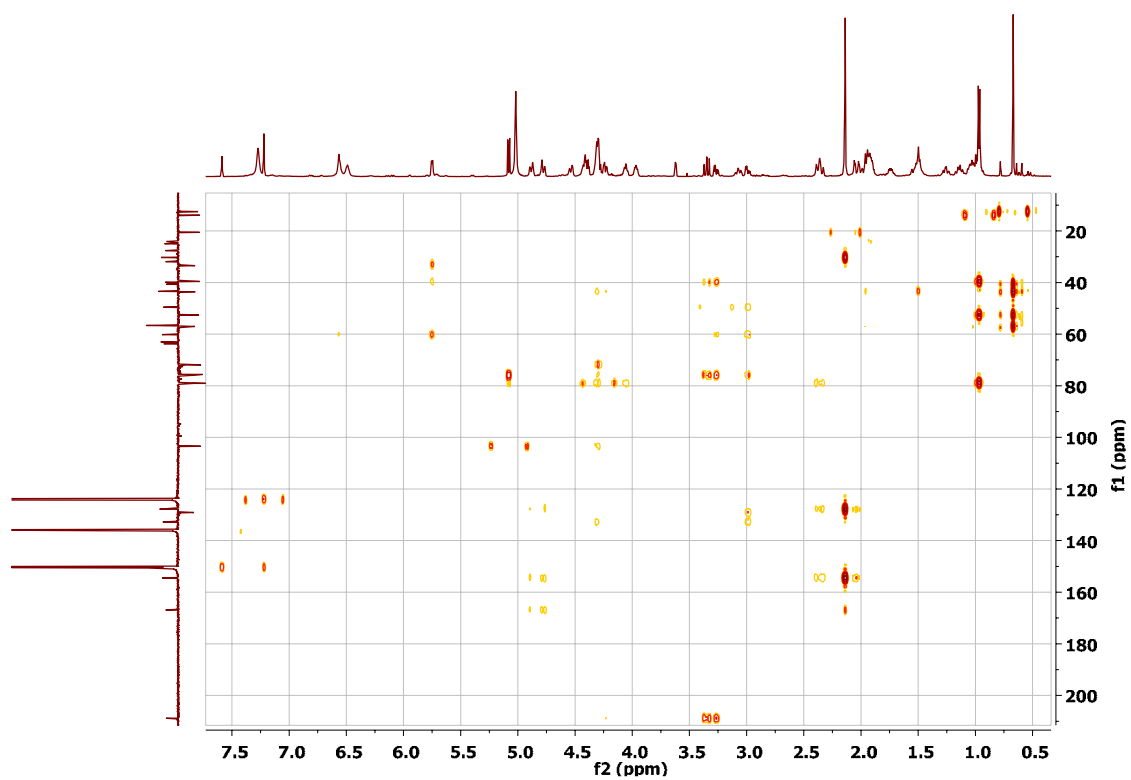



**S9(f)** NOESY spectrum of withalongolide I (**9**)

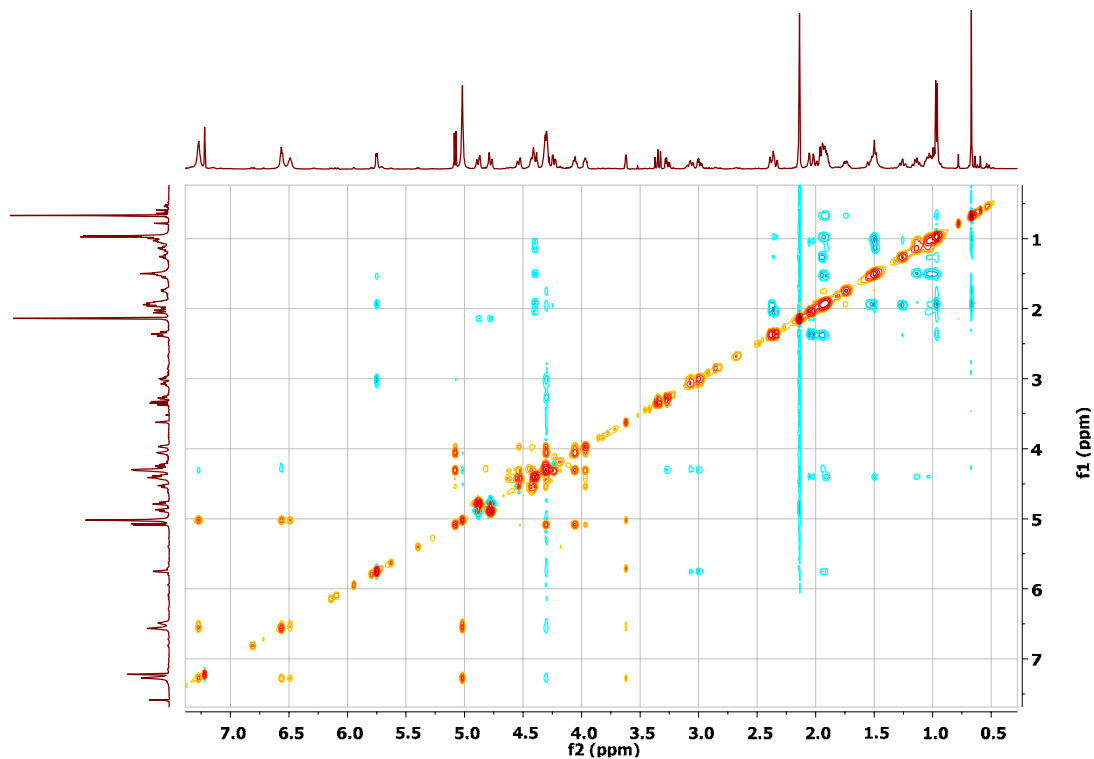

**S10(a)**  $^1\text{H}$  NMR spectrum of withalongolide J (**10**) in  $\text{C}_5\text{D}_5\text{N}$  (500 MHz)

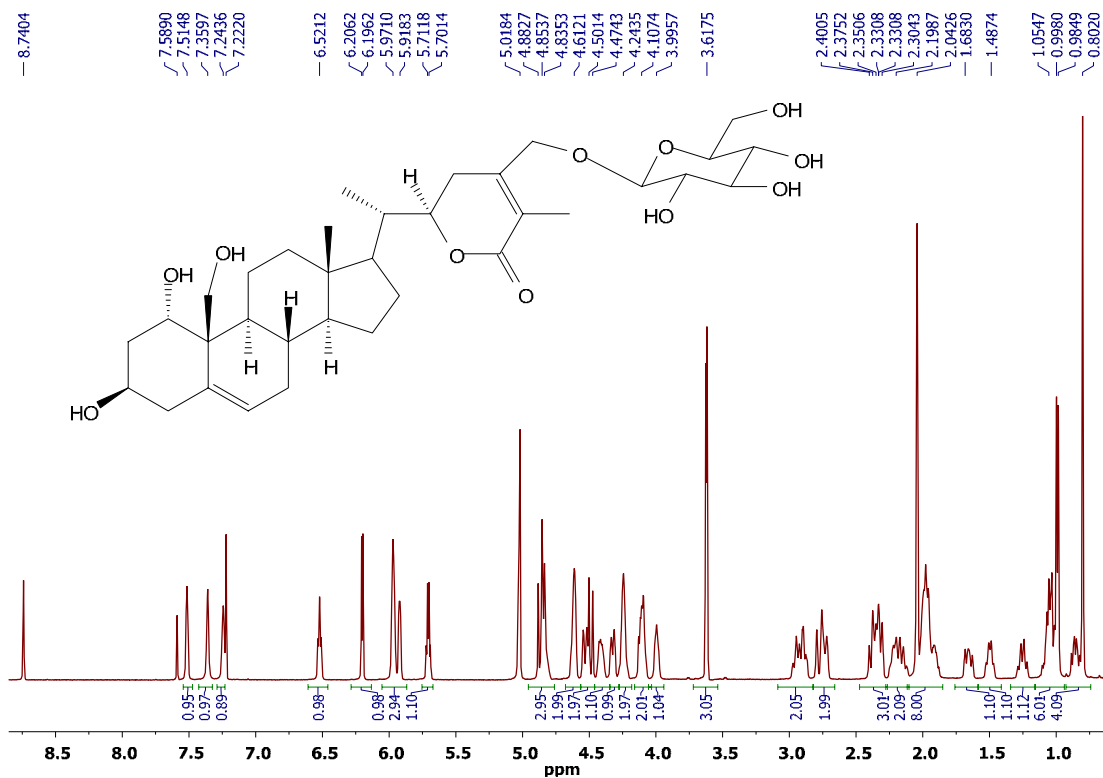

S10(b)  $^{13}\text{C}$  APT spectrum of withalongolide J (**10**) (125 MHz)

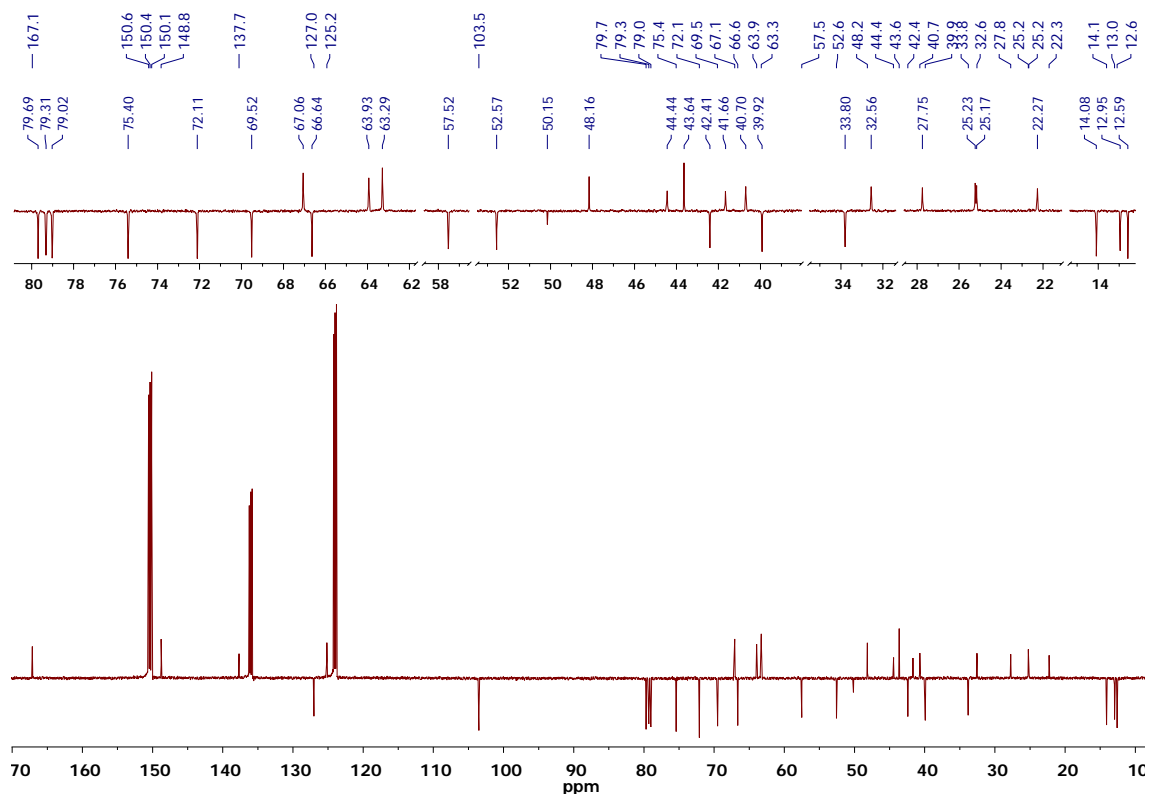

S10(c)  $^1\text{H}$ - $^1\text{H}$  COSY spectrum of withalongolide J (**10**)

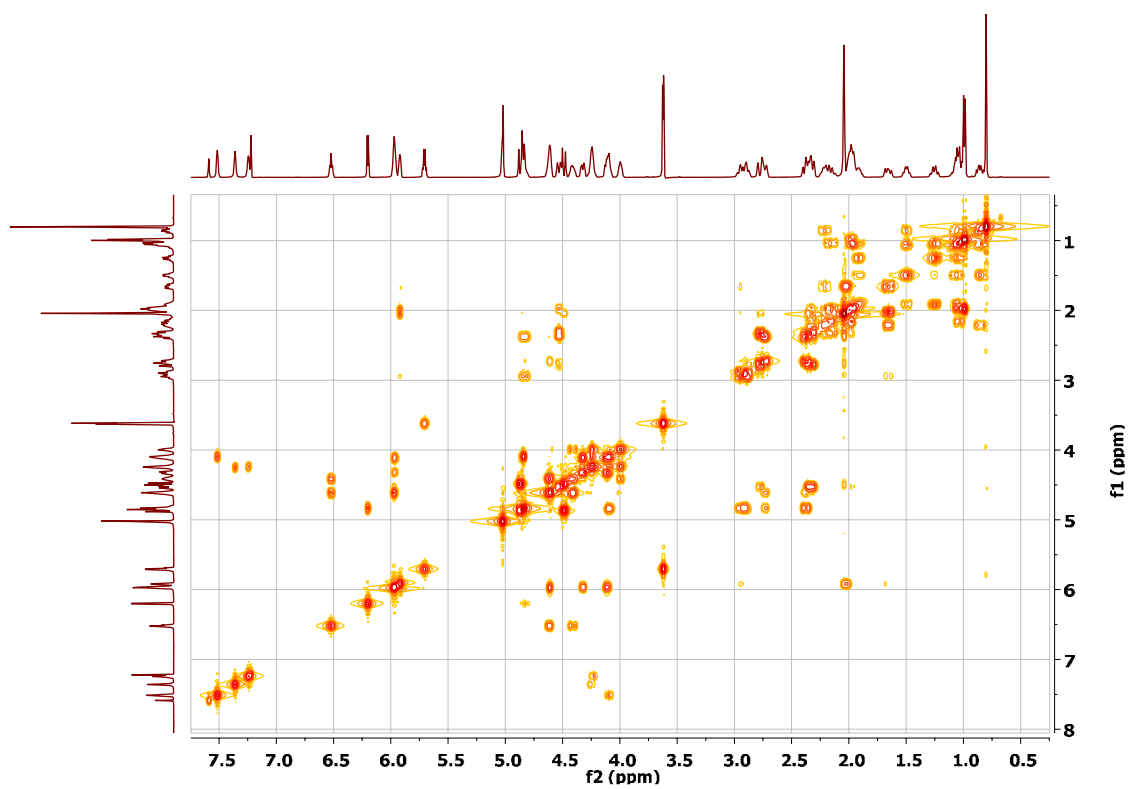

S10(d) HSQC spectrum of withalongolide J (10)

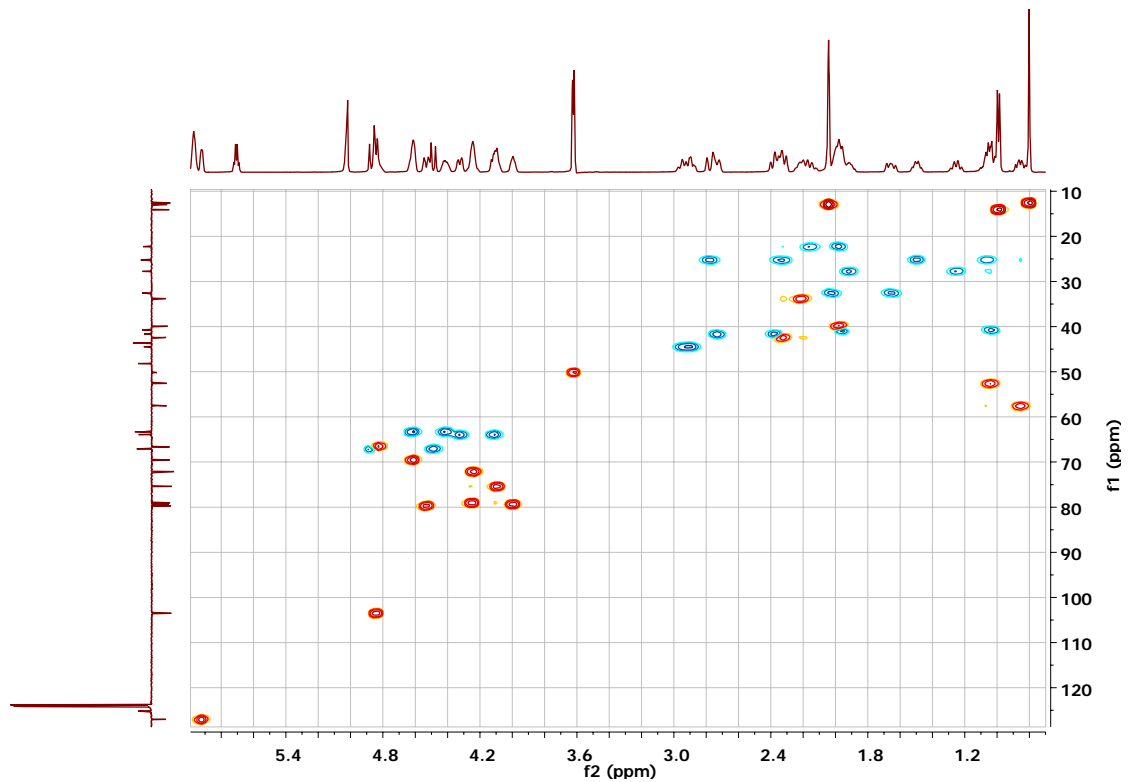

S10(e) HMBC spectrum of withalongolide J (10)

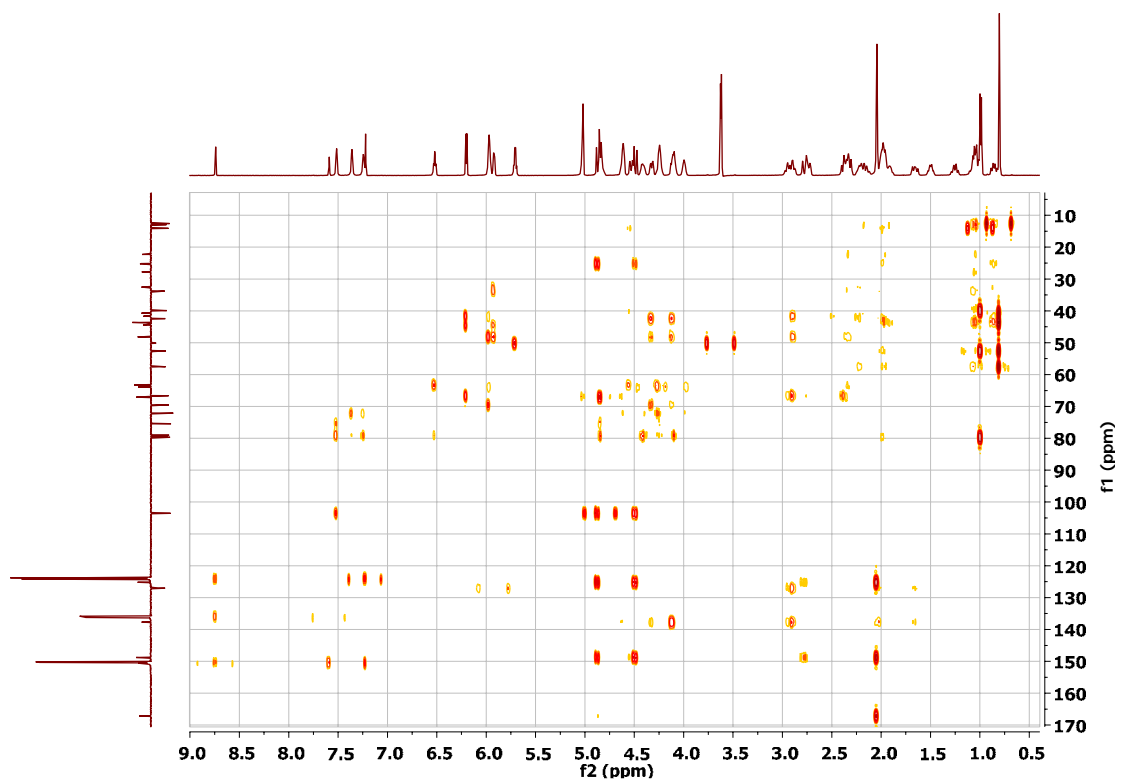

S10(f) NOESY spectrum of withalongolide J (10)

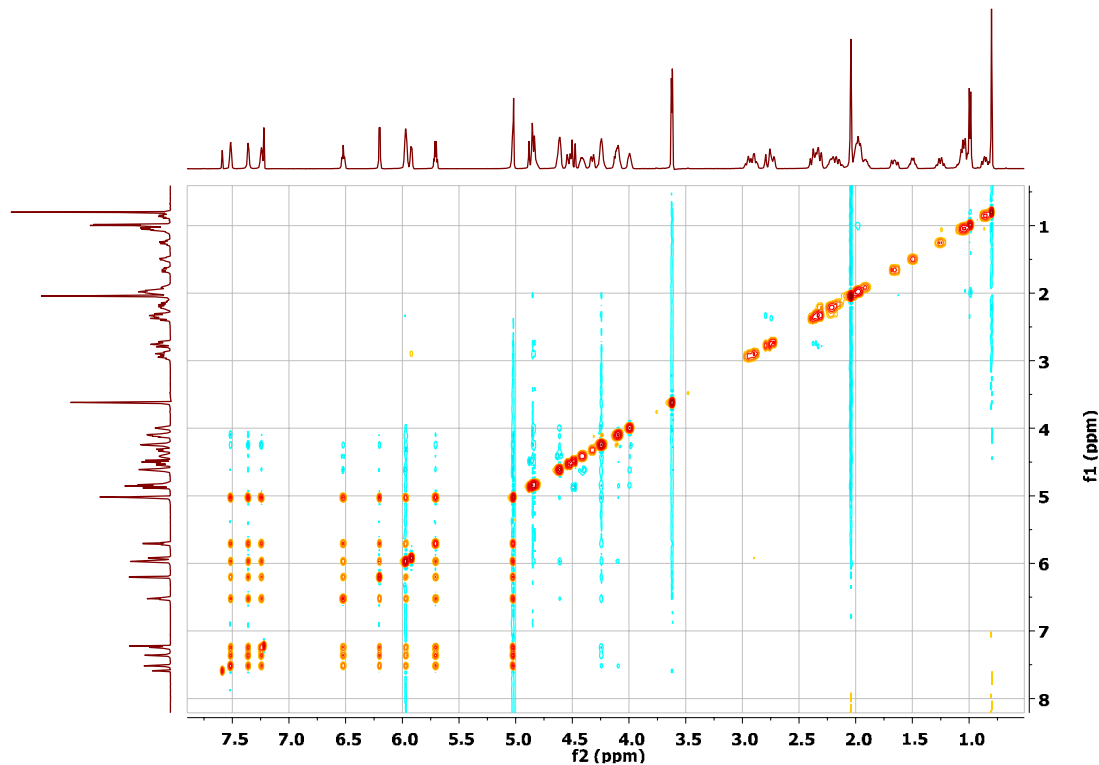

S11(a) <sup>1</sup>H NMR spectrum of withalongolide K (11) in C<sub>5</sub>D<sub>5</sub>N (500 MHz)

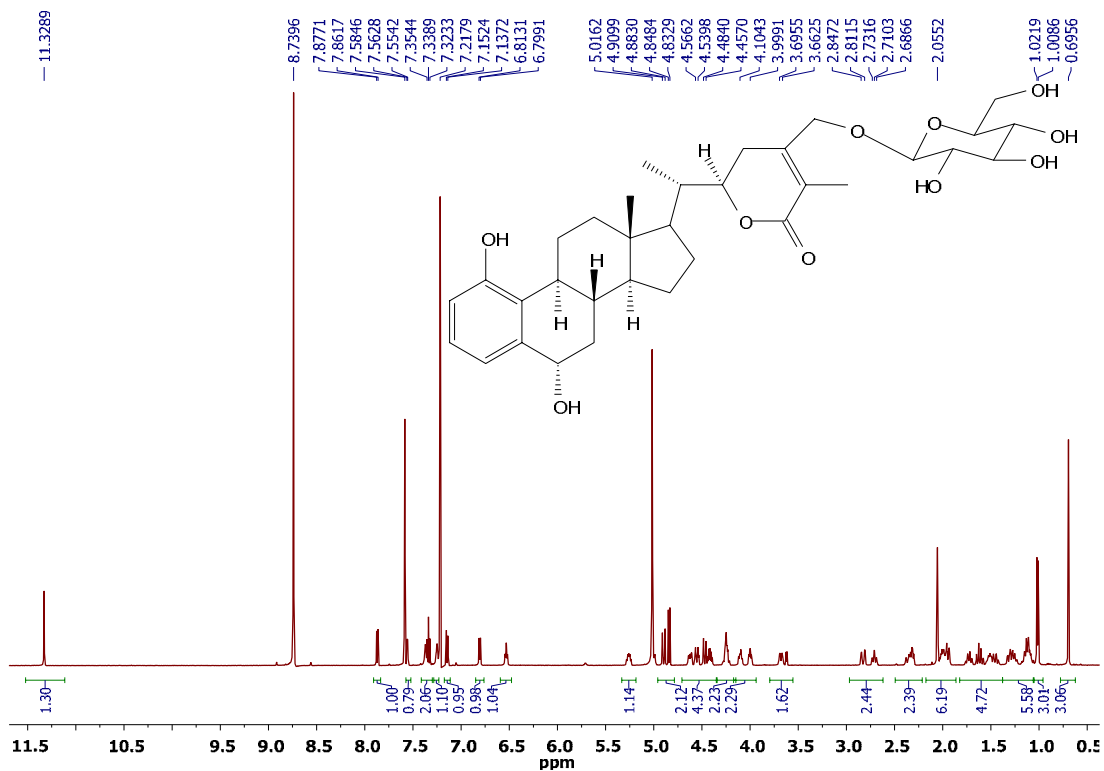

S11(b)  $^{13}\text{C}$  APT spectrum of withalongolide K (**11**) (125 MHz)

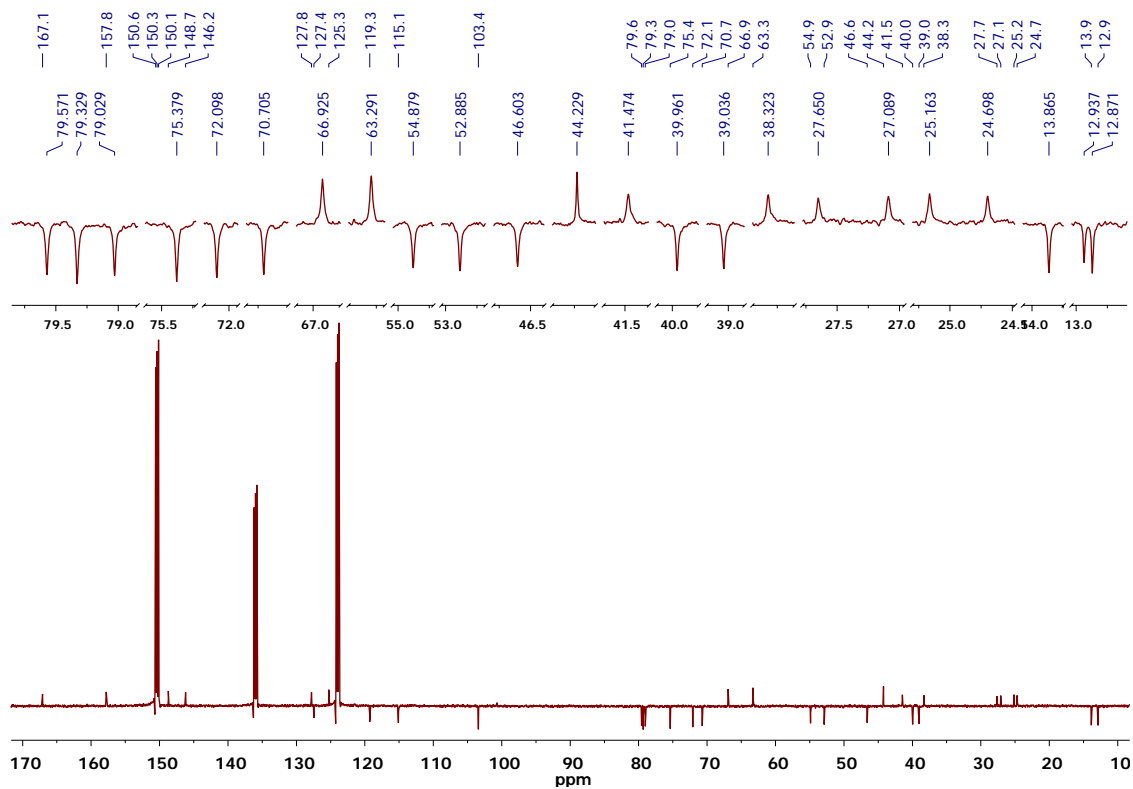

S11(c)  $^1\text{H}$ - $^1\text{H}$  COSY spectrum of withalongolide K (**11**)

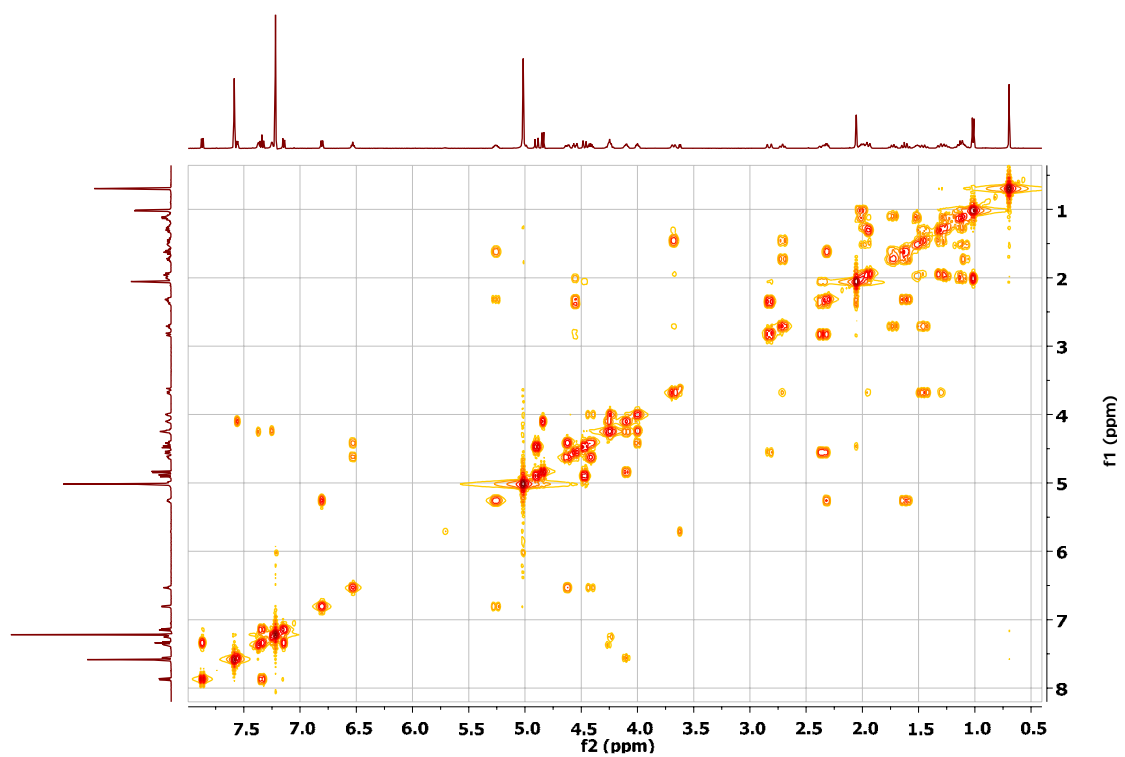

S11(d) HSQC spectrum of withalongolide K (11)

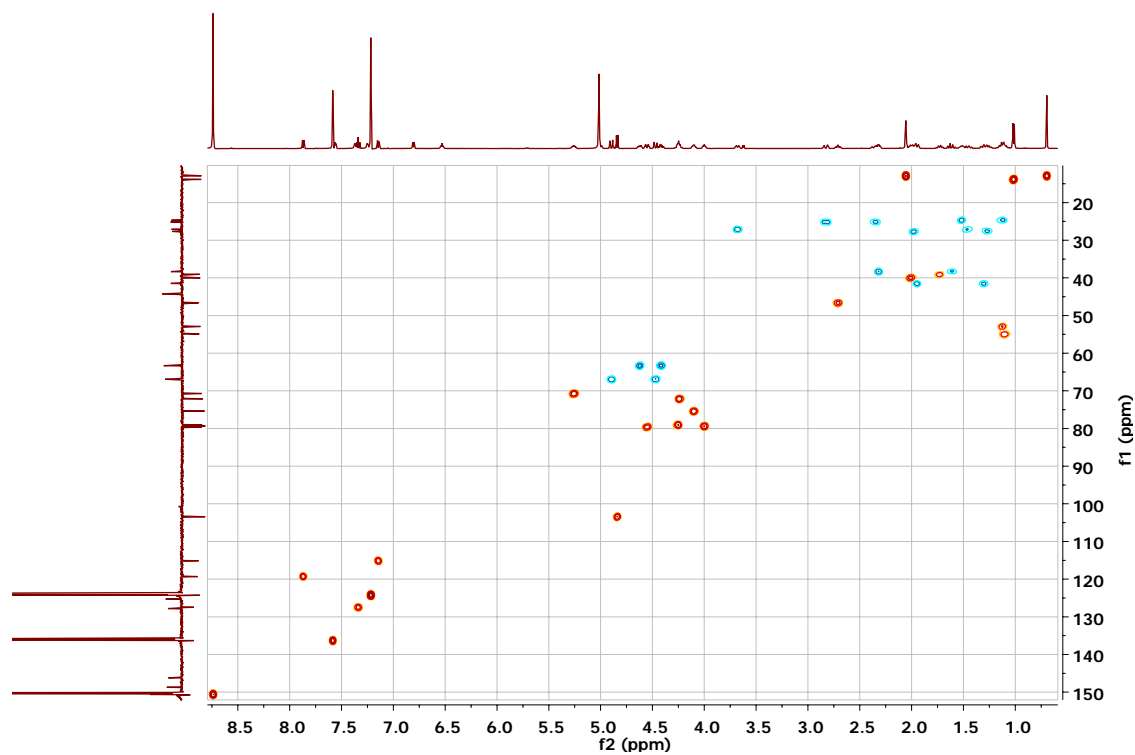

S11(e) HMBC spectrum of withalongolide K (11)

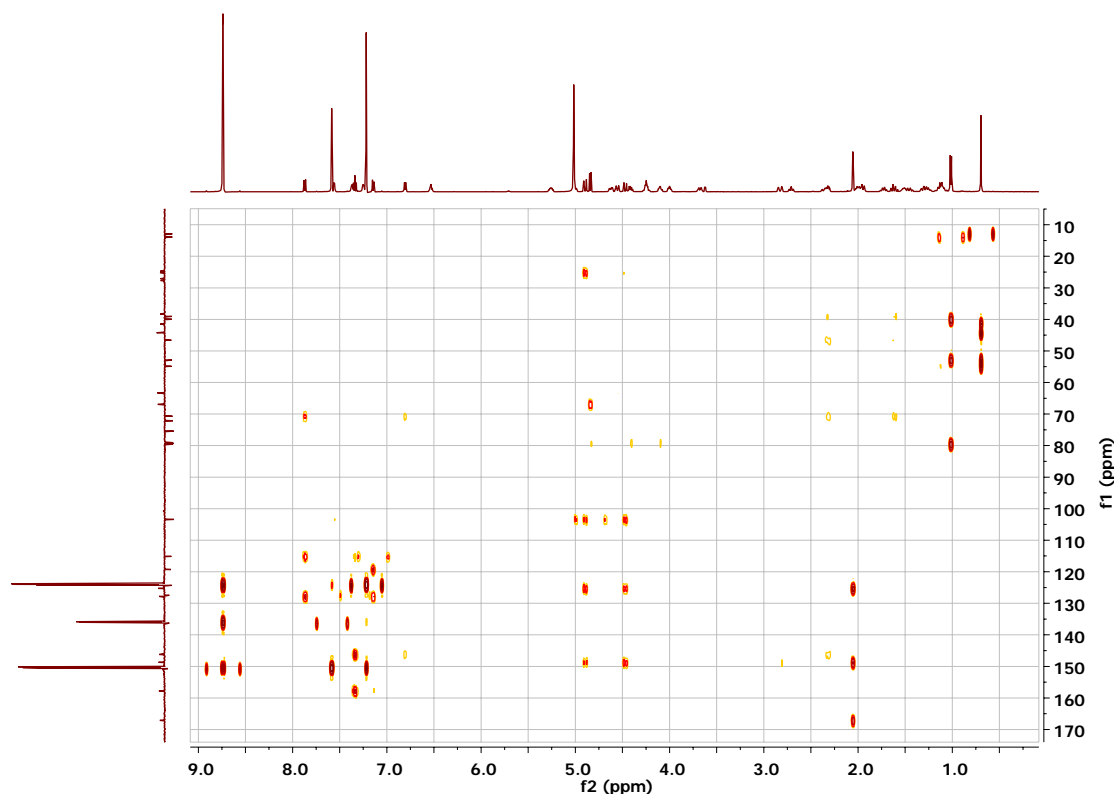

S11(f) NOESY spectrum of withalongolide K (11)

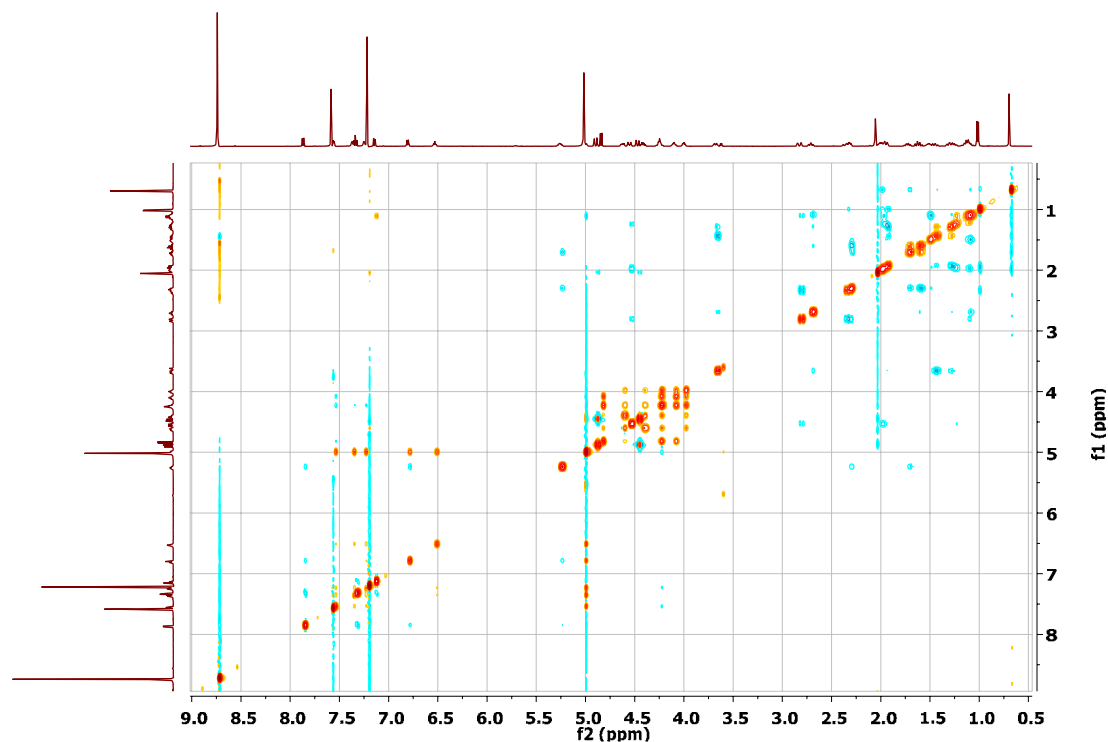

S12(a) <sup>1</sup>H NMR spectrum of withalongolide L (12) in C<sub>5</sub>D<sub>5</sub>N (500 MHz)

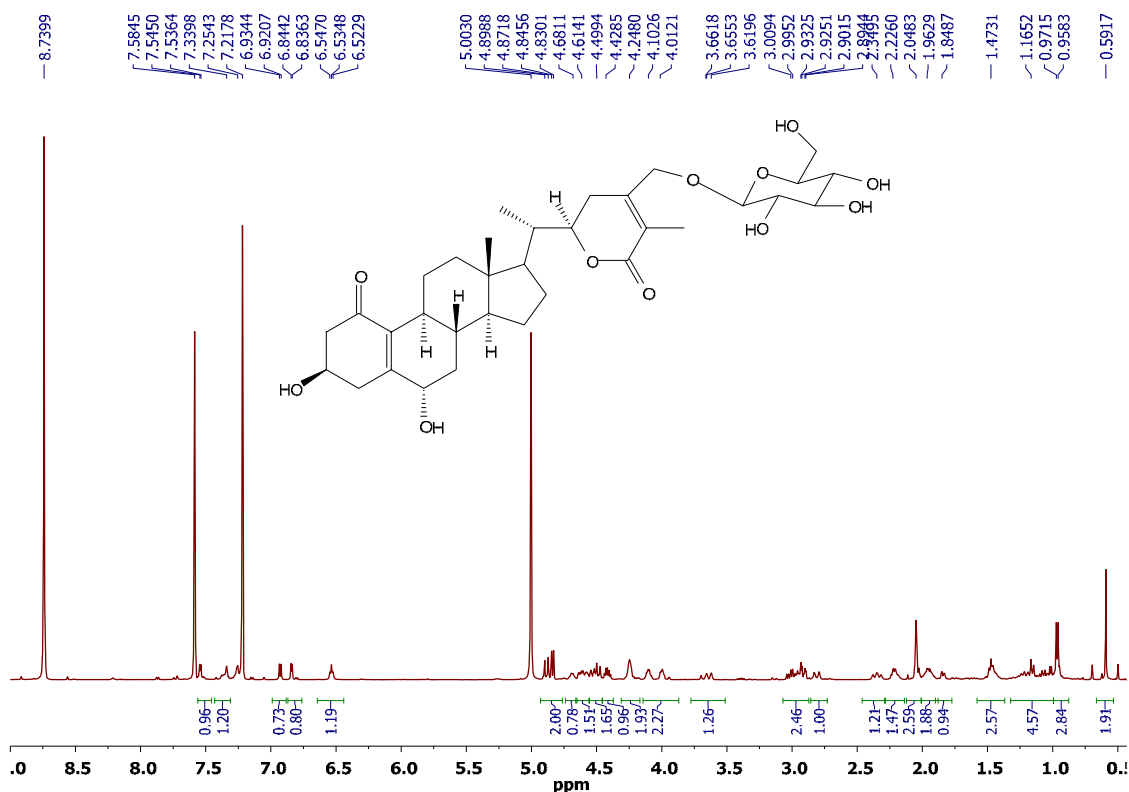

S12(b)  $^{13}\text{C}$  APT spectrum of withalongolide L (**12**) (125 MHz)

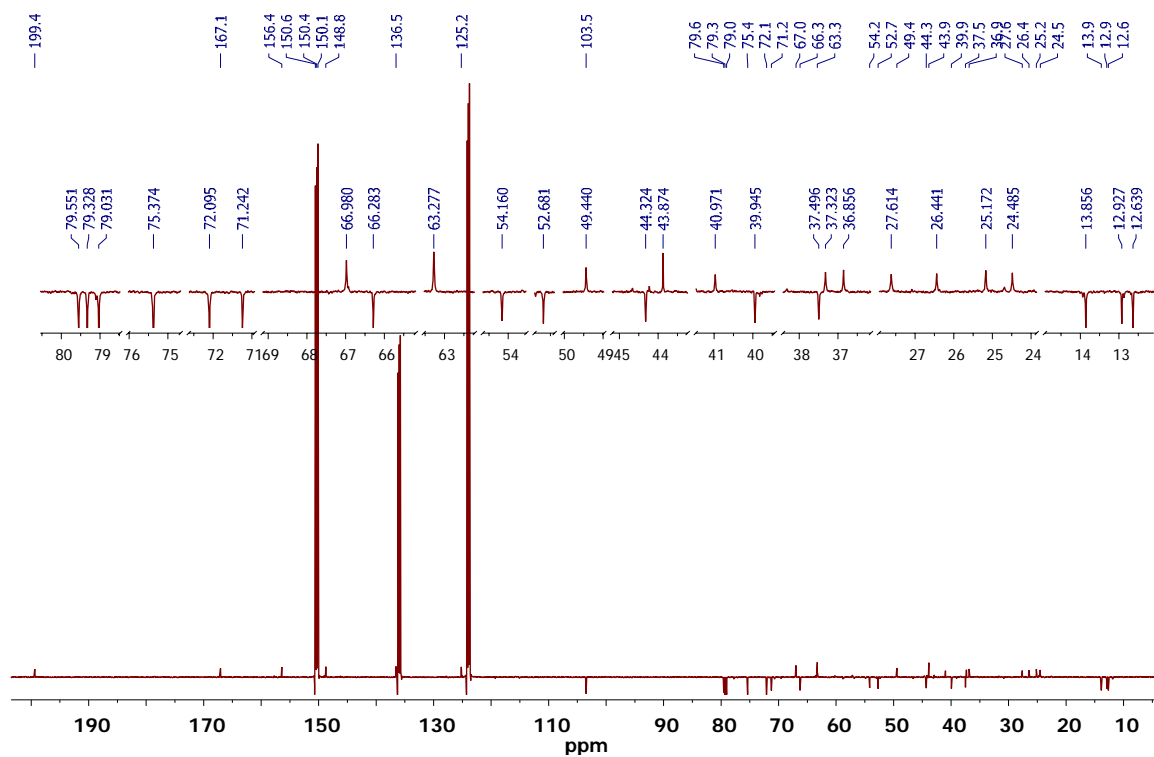

S12(c)  $^1\text{H}$ - $^1\text{H}$  COSY spectrum of withalongolide L (**12**)

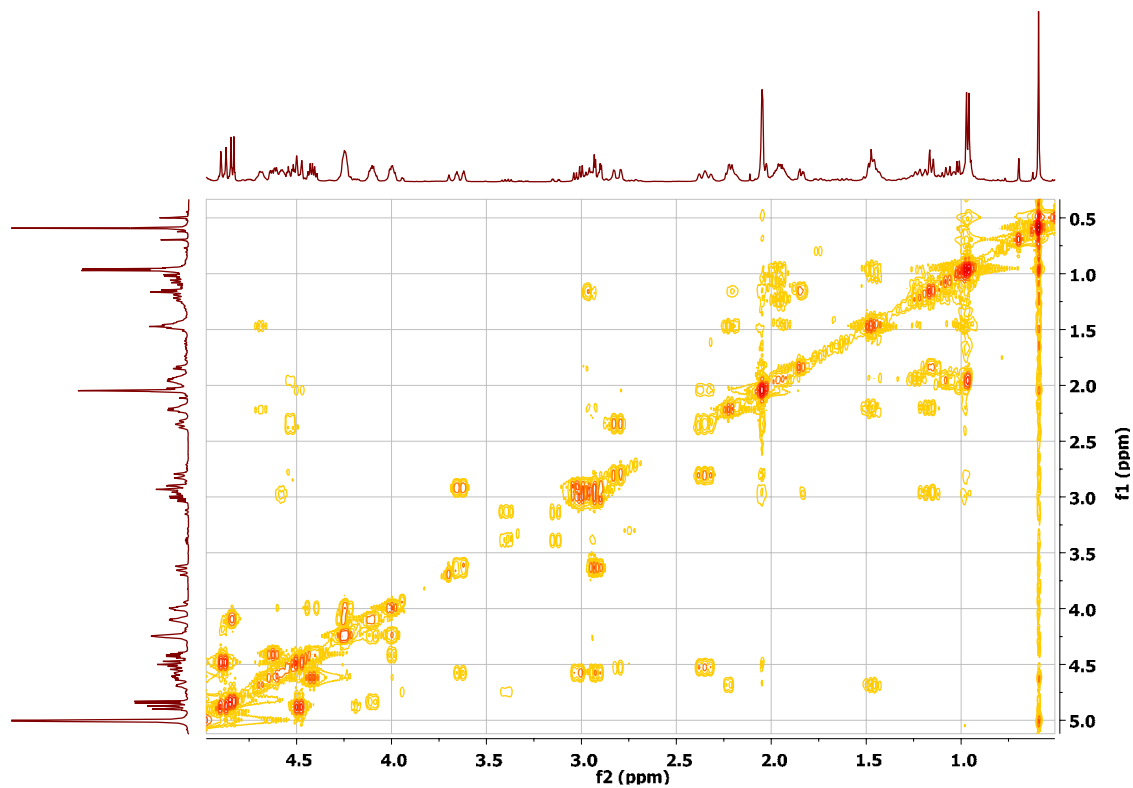



S12(d) HSQC spectrum of withalongolide L (12)

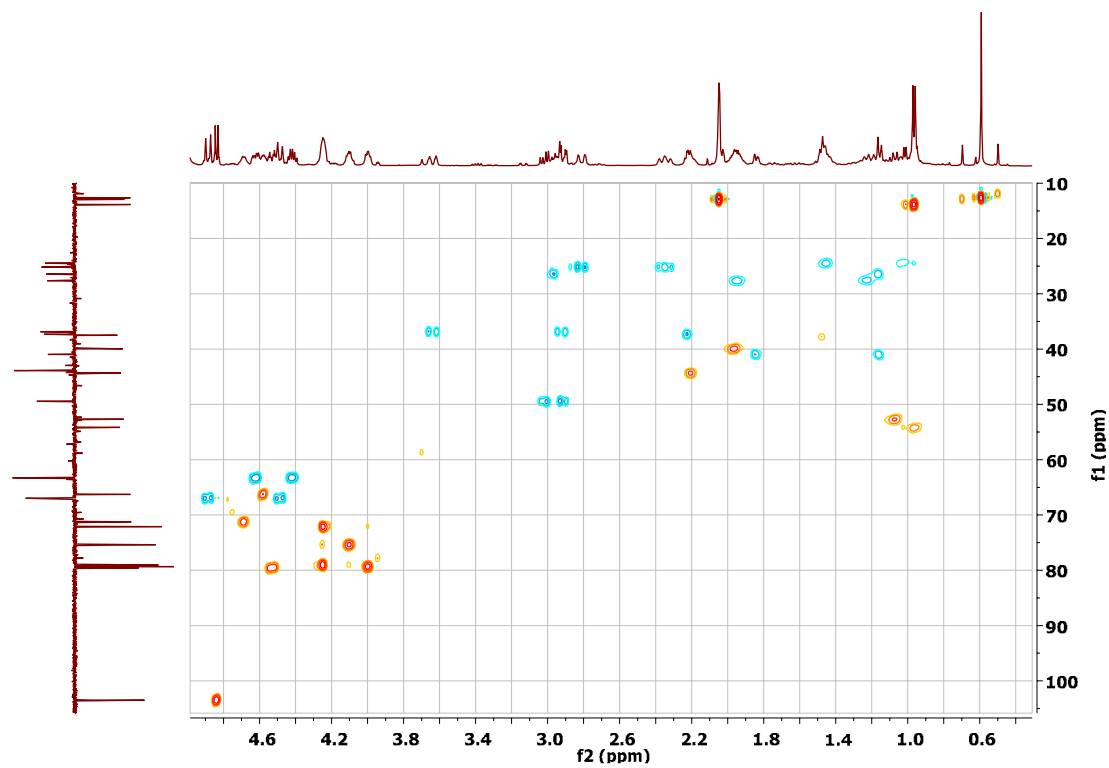

S12(e) HMBC spectrum of withalongolide L (12)

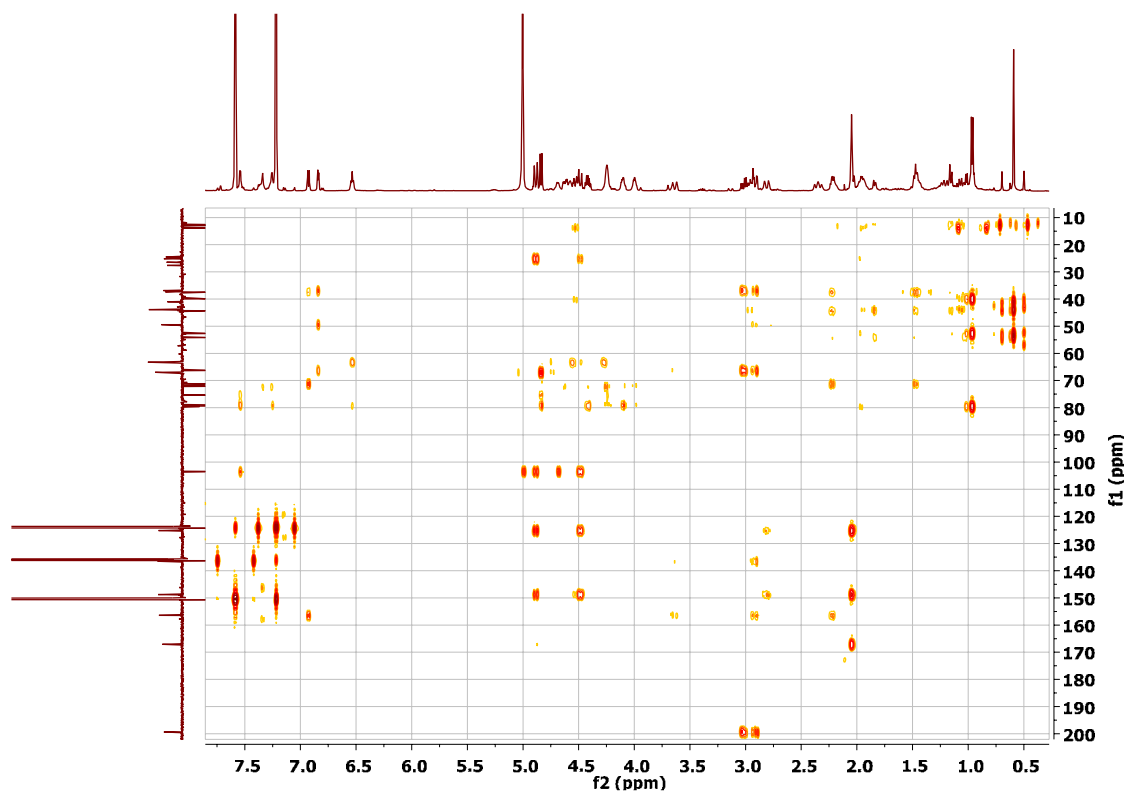

S12(f) NOESY spectrum of withalongolide L (12)

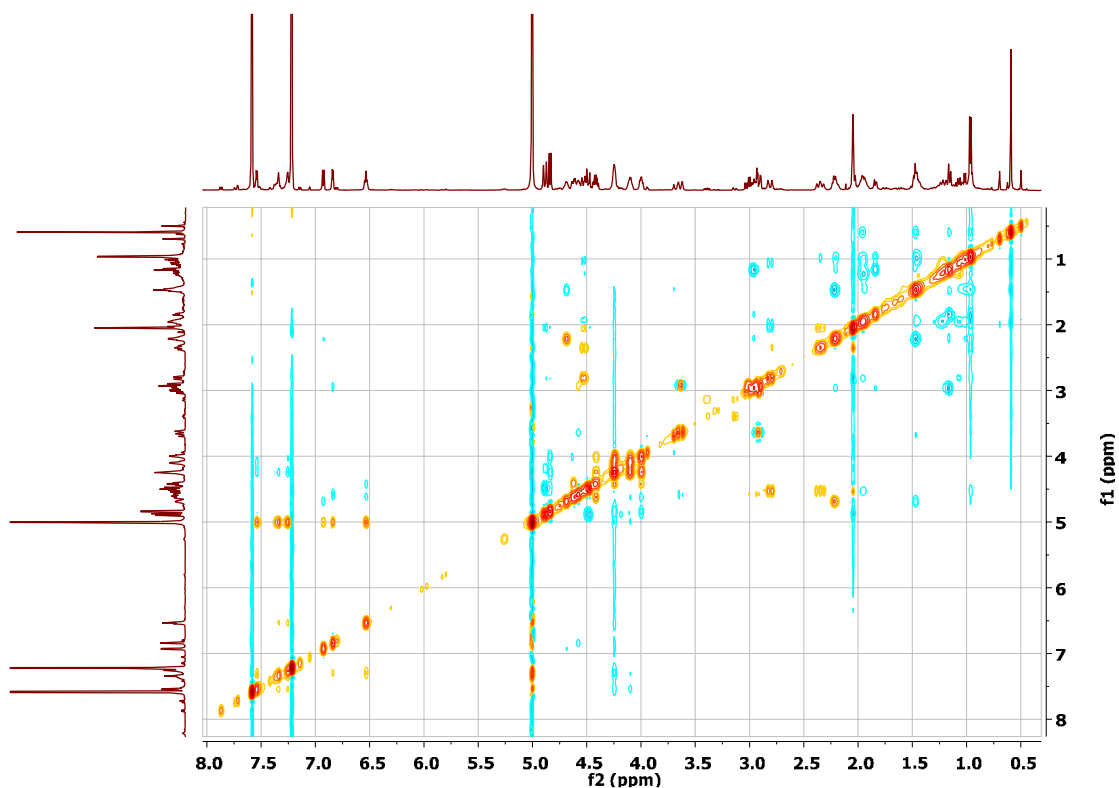

S13(a)  $^1\text{H}$  NMR spectrum of withalongolide M (13) in  $\text{C}_5\text{D}_5\text{N}$  (500 MHz)

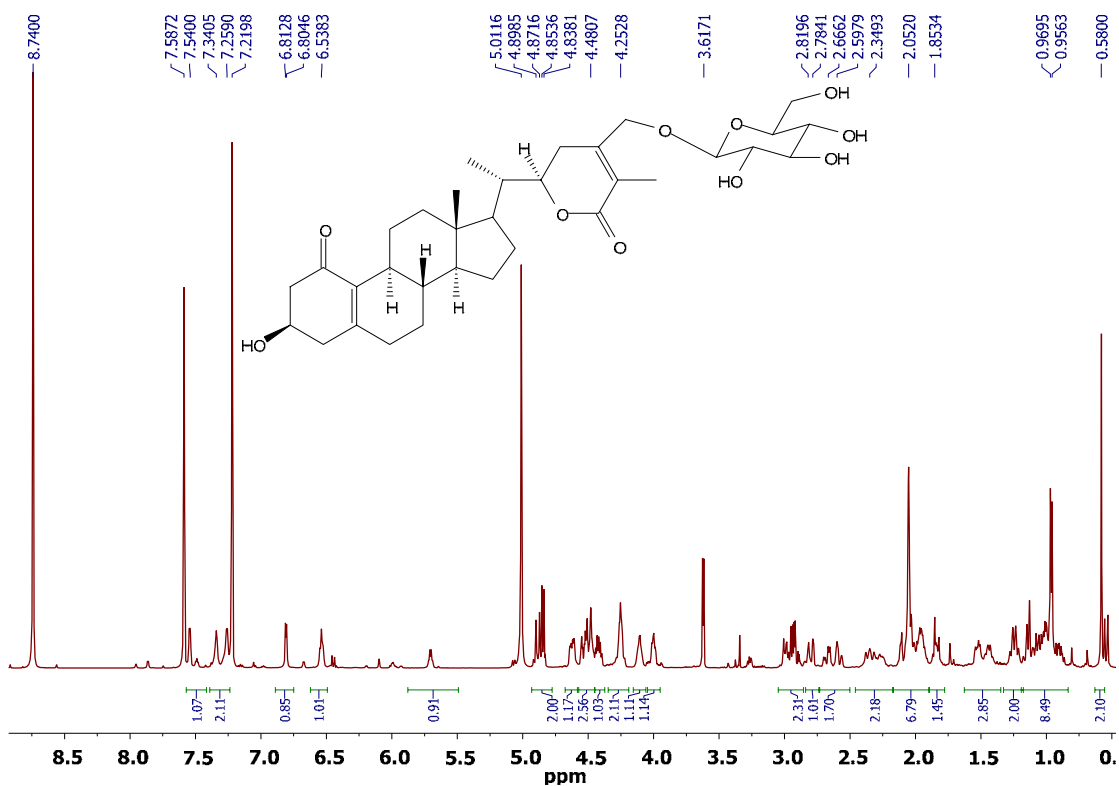

S13(b)  $^{13}\text{C}$  APT spectrum of withalongolide M (**13**) (125 MHz)

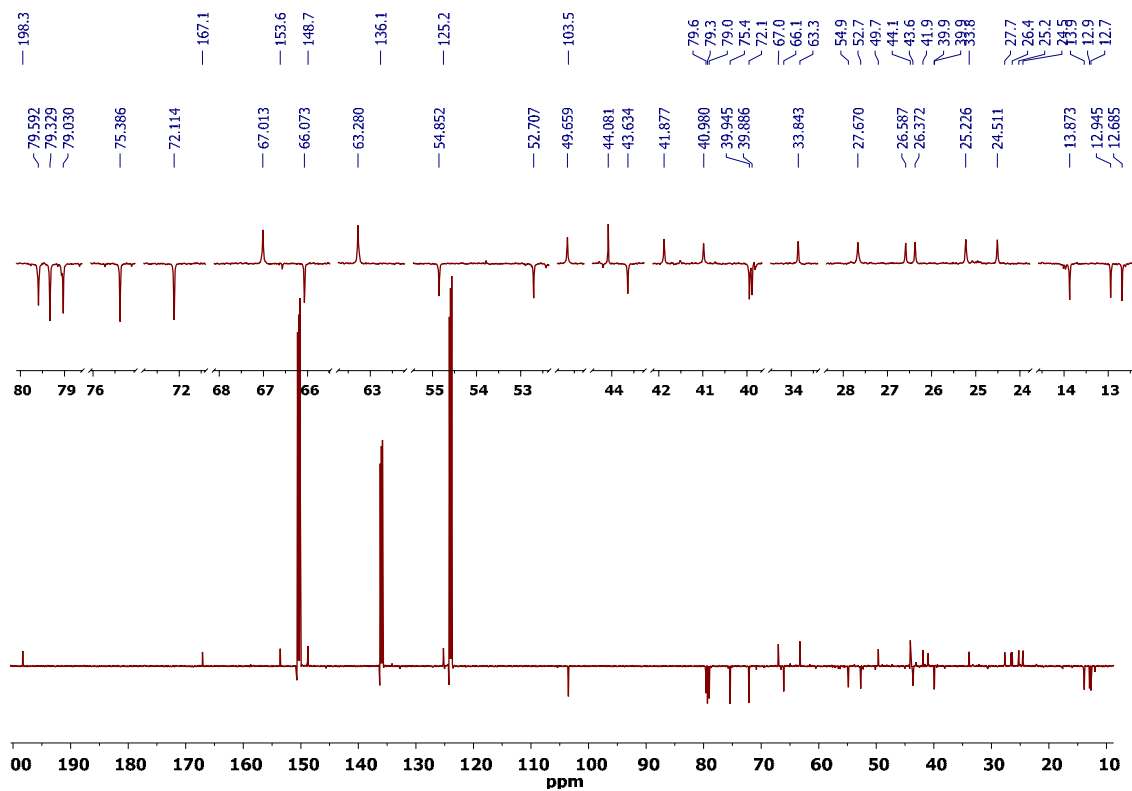

S13(c)  $^1\text{H}$ - $^1\text{H}$  COSY spectrum of withalongolide M (**13**)

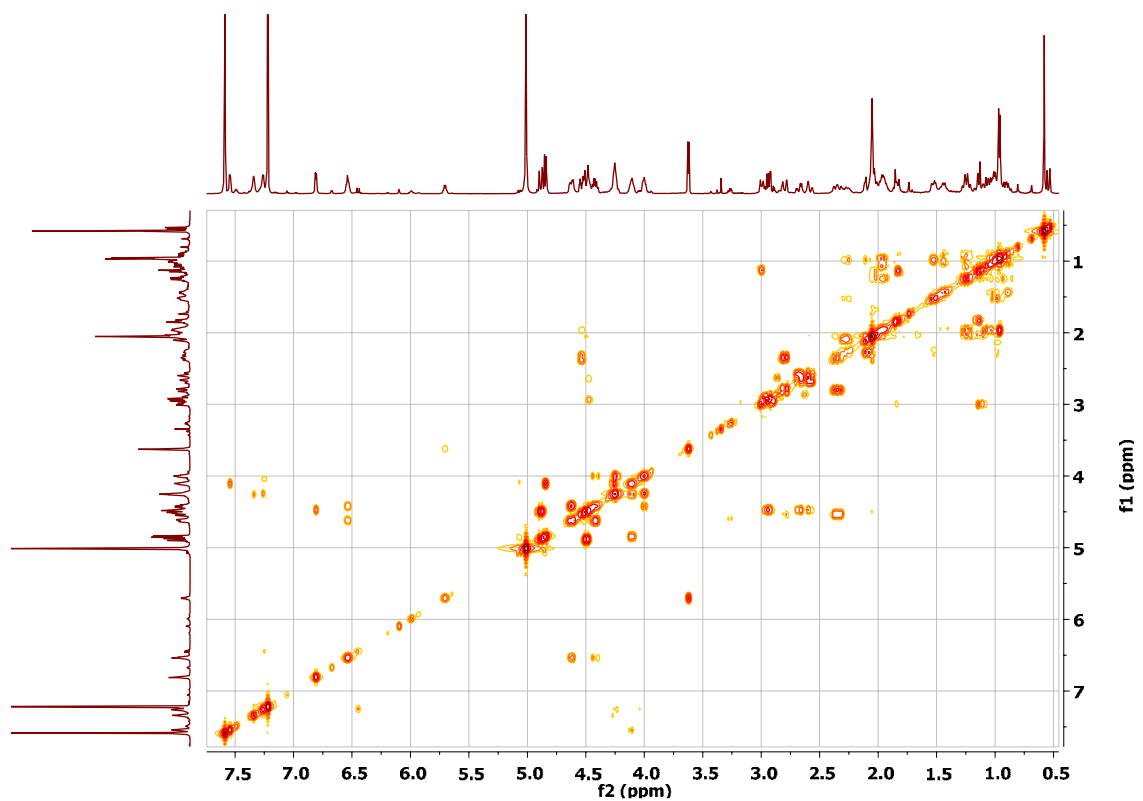

S13(d) HSQC spectrum of withalongolide M (13)

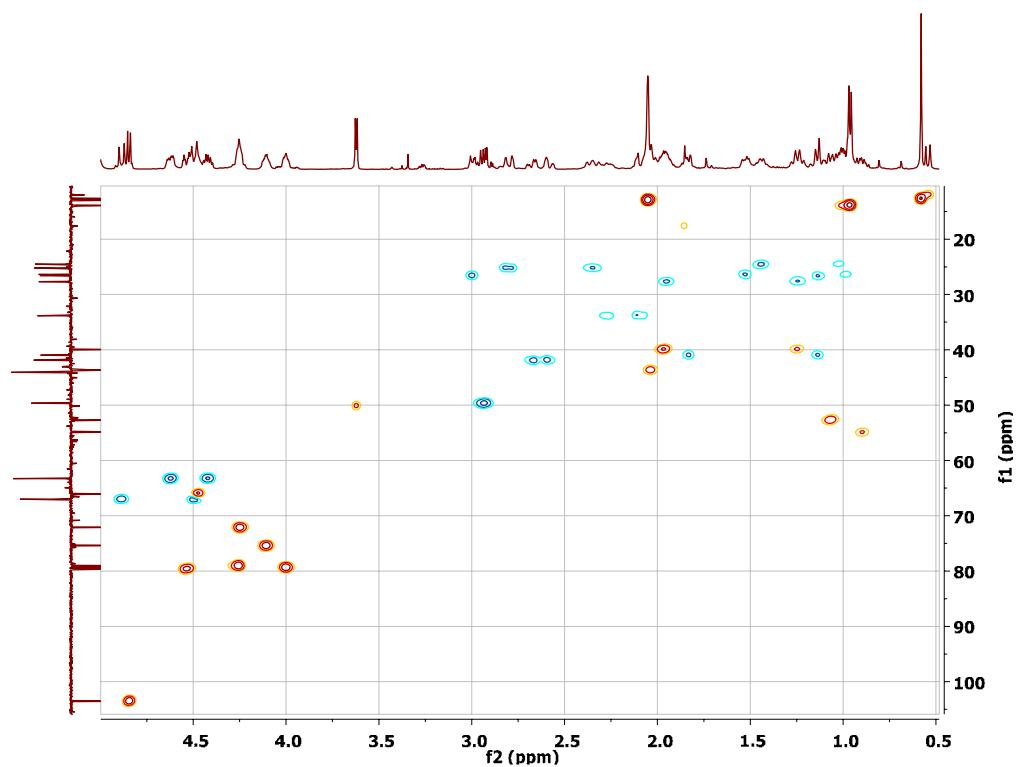

S13(e) HMBC spectrum of withalongolide M (13)

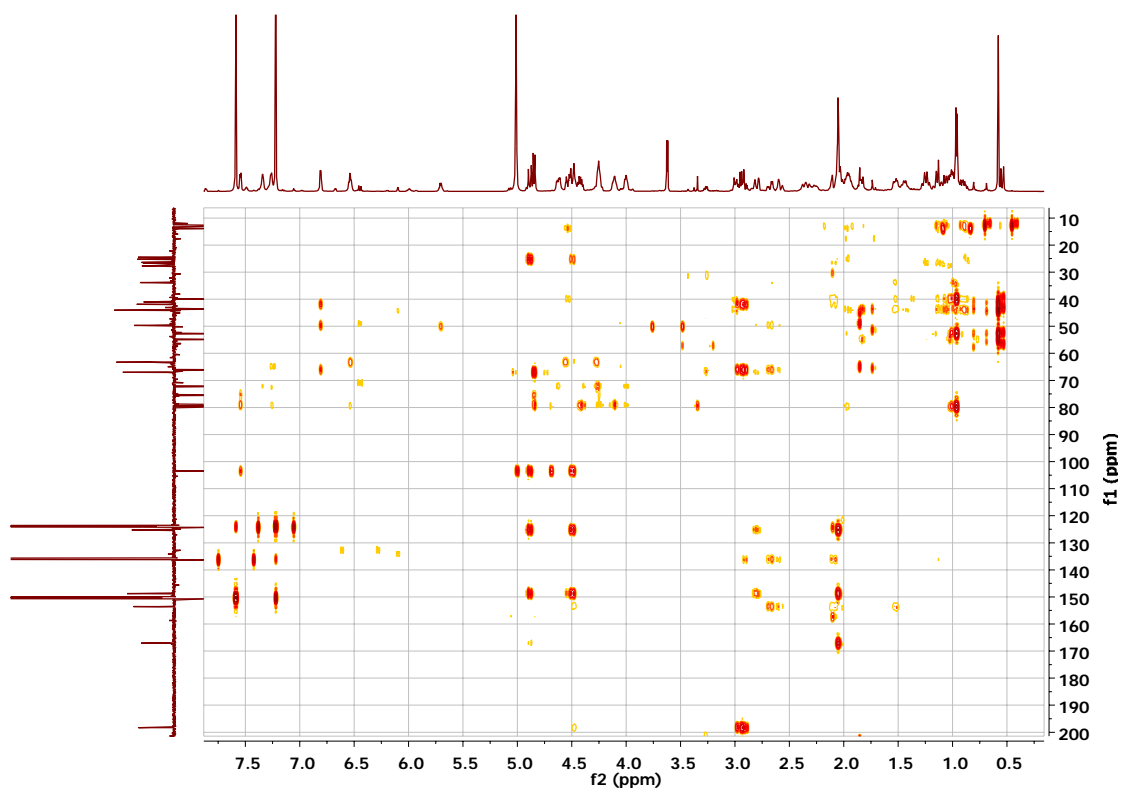

S13(f) NOESY spectrum of withalongolide M (13)

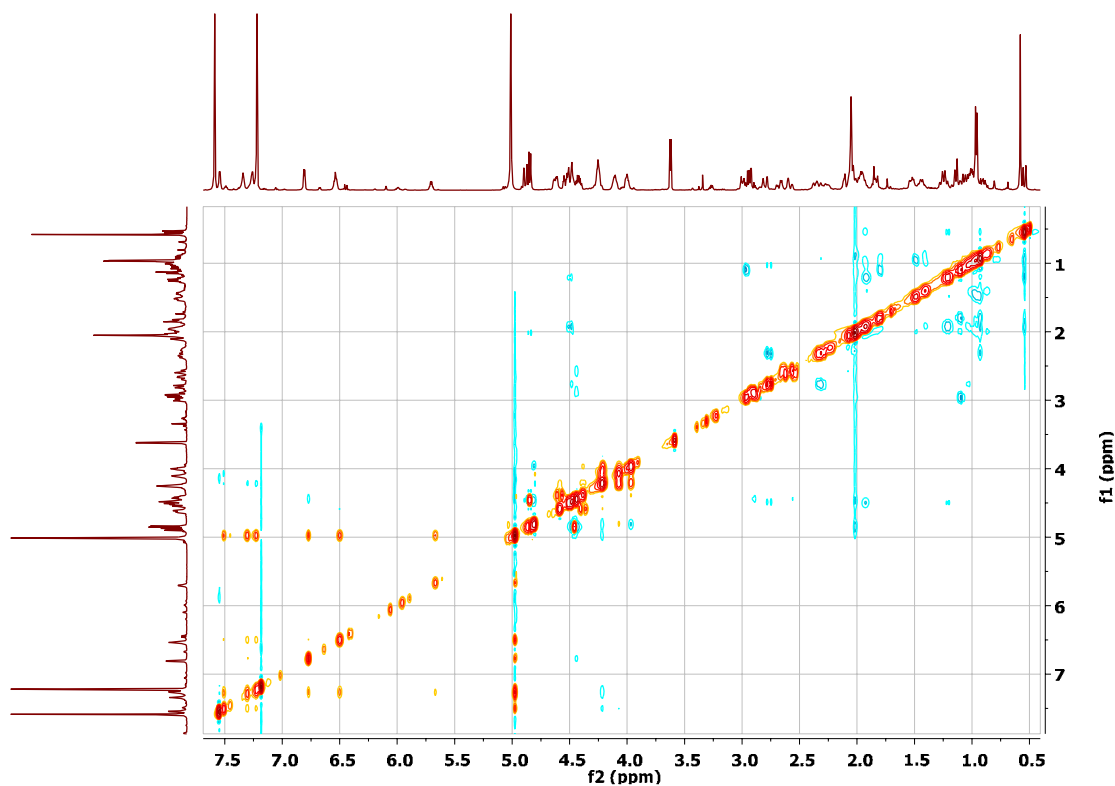

S14(a)  $^1\text{H}$  NMR spectrum of withalongolide N (14) in  $\text{C}_5\text{D}_5\text{N}$  (500 MHz)

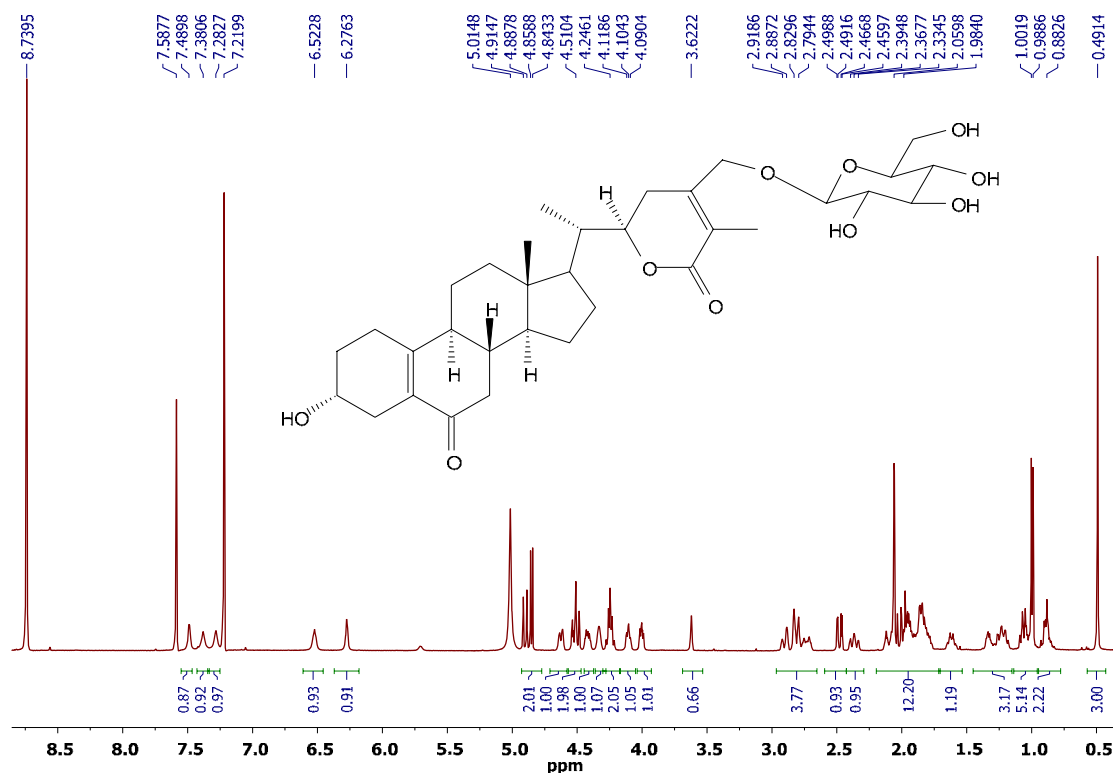

S14(b)  $^{13}\text{C}$  APT spectrum of withalongolide N (**14**) (125 MHz)

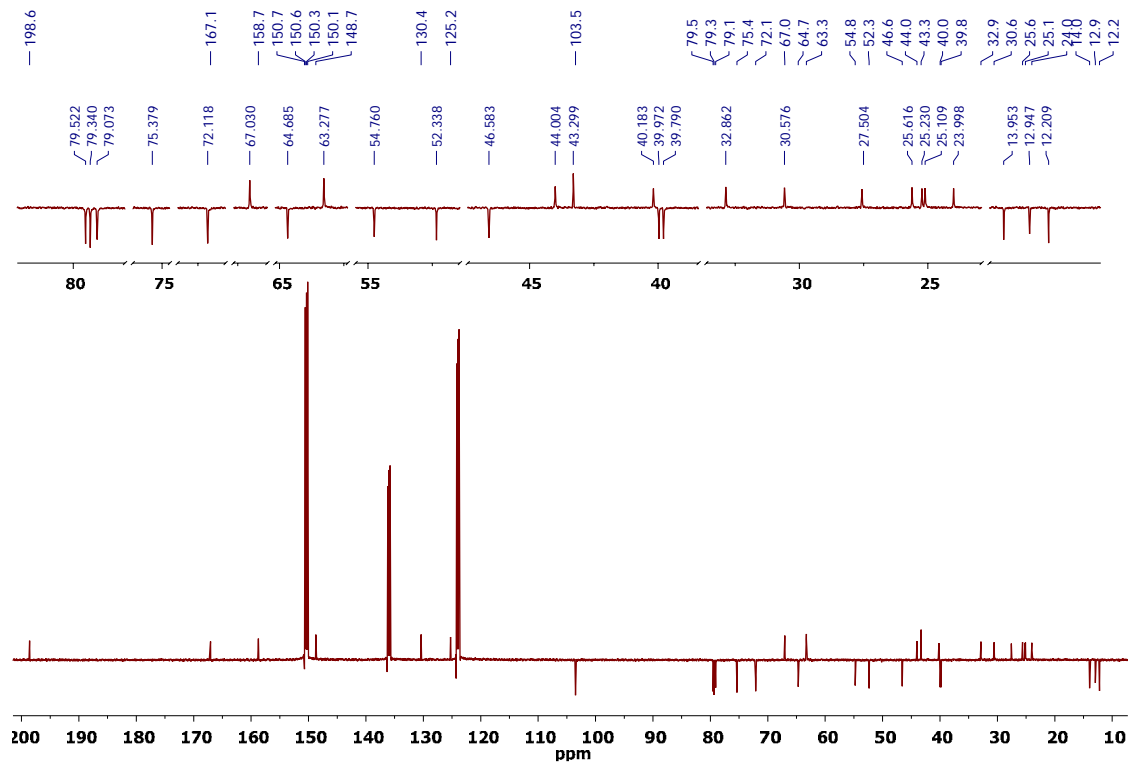

S14(c)  $^1\text{H}$ - $^1\text{H}$  COSY spectrum of withalongolide N (**14**)

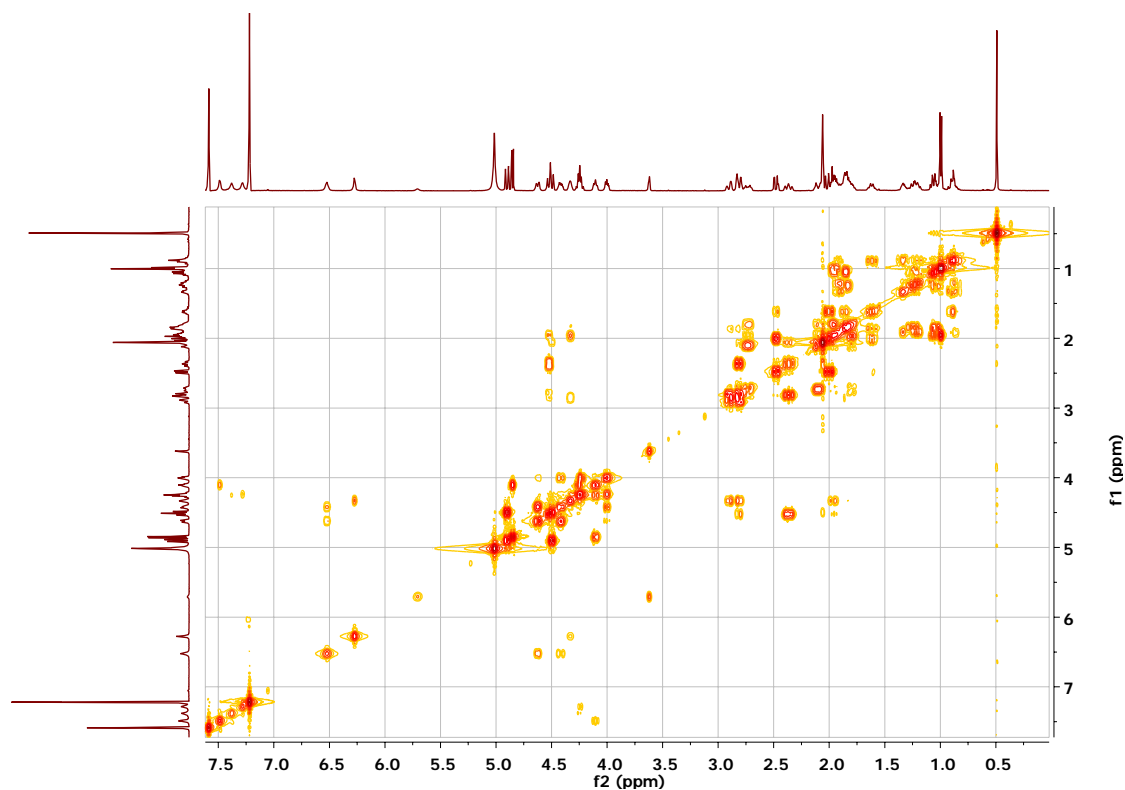

S14(d) HSQC spectrum of withalongolide N (14)

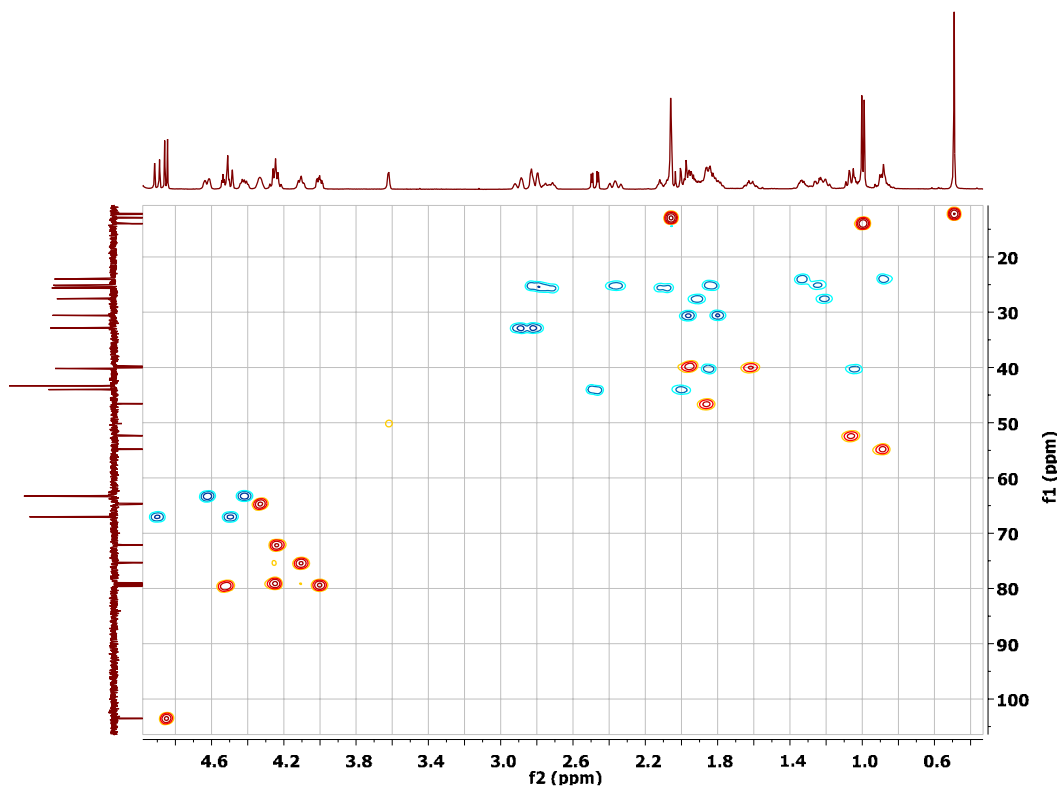

S14(e) HMBC spectrum of withalongolide N (14)

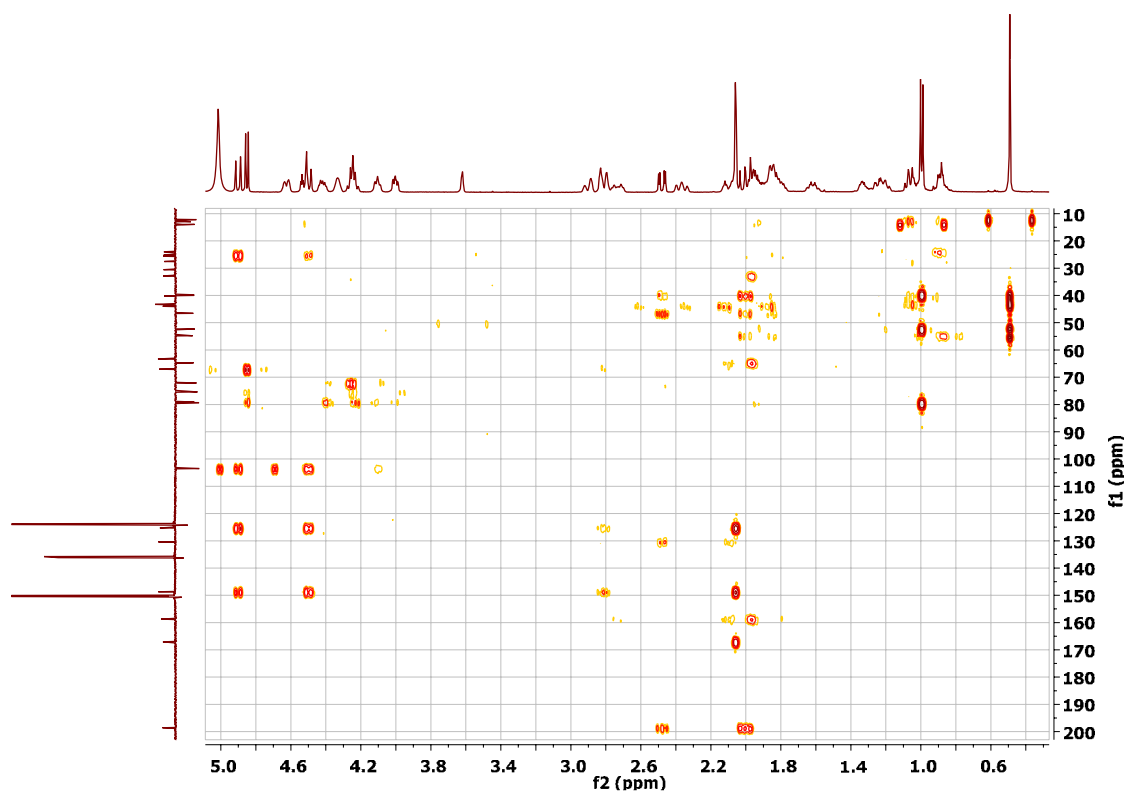

S14(f) NOESY spectrum of withalongolide N (14)

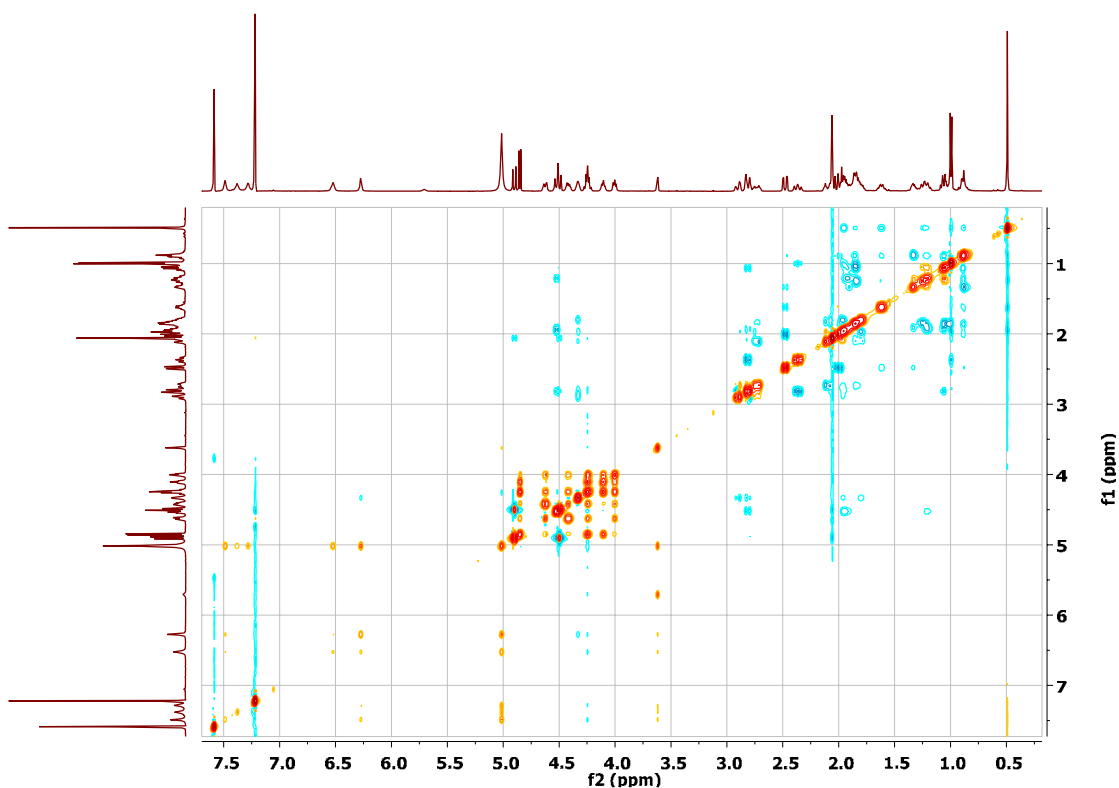

S15(a) <sup>1</sup>H NMR spectrum of sitoindoside IX (15) in C5D5N (500 MHz)

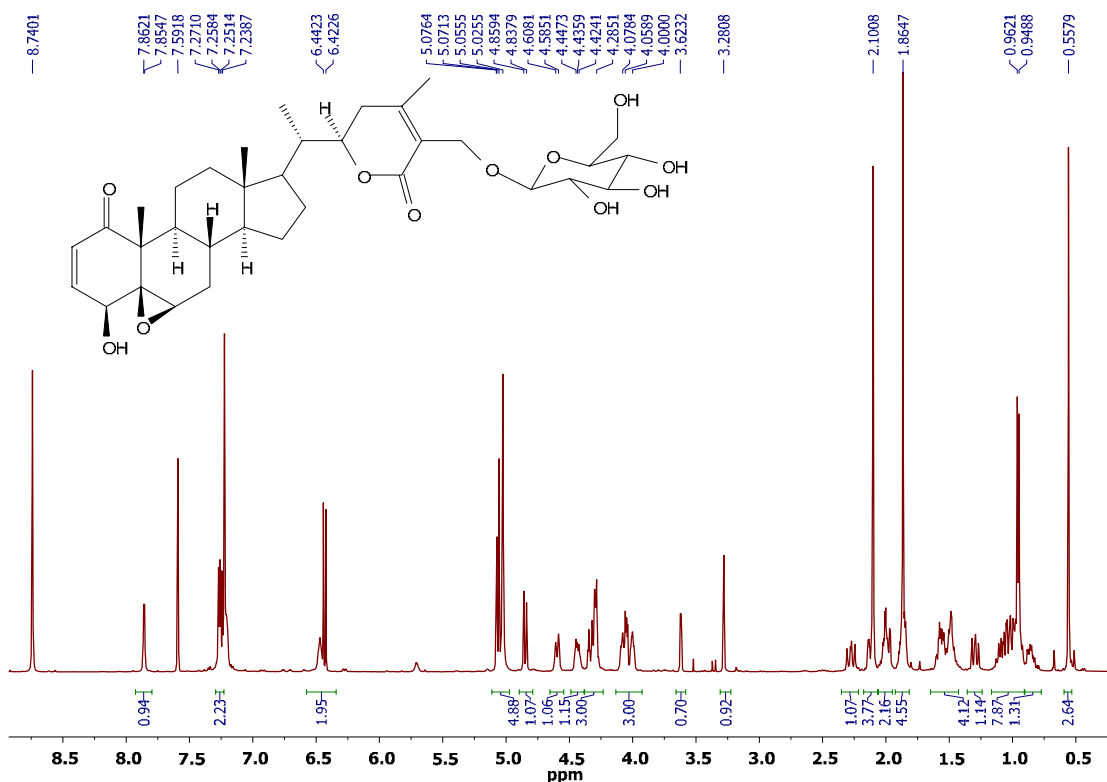



**S15(b)**  $^{13}\text{C}$  APT spectrum of sitoindoside IX (**15**) (125 MHz)

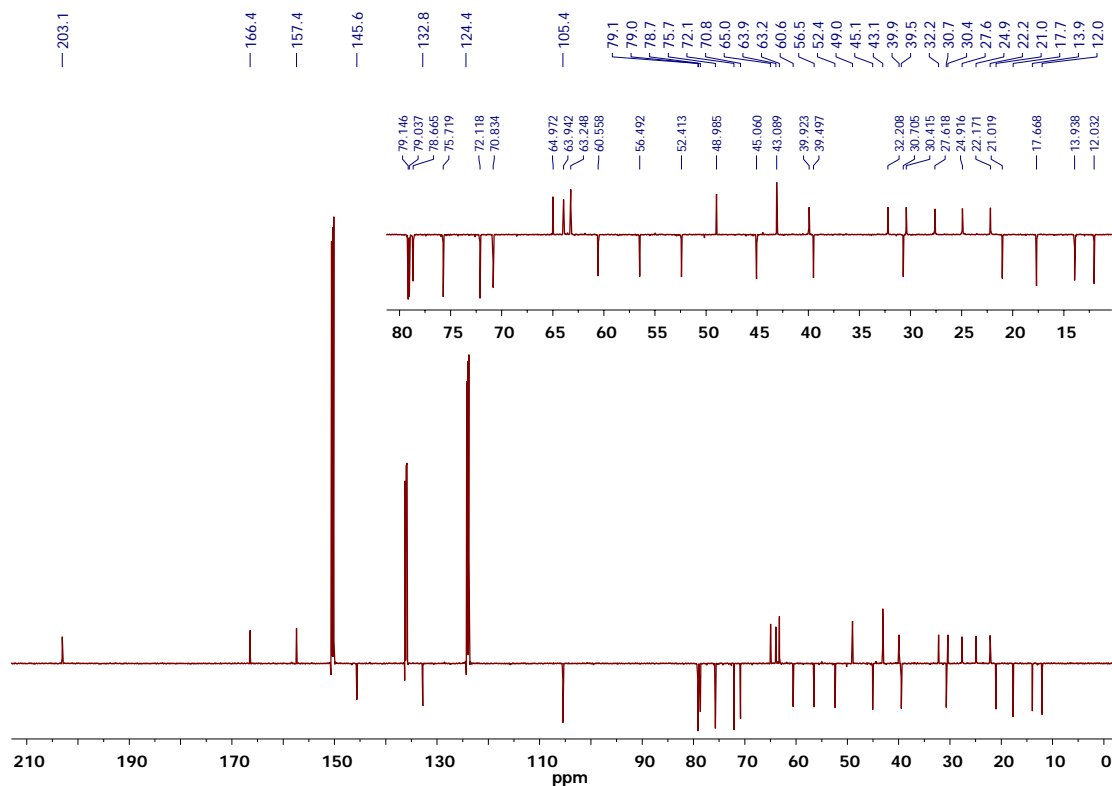

**S15(c)**  $^1\text{H}$ - $^1\text{H}$  COSY spectrum of sitoindoside IX (**15**)

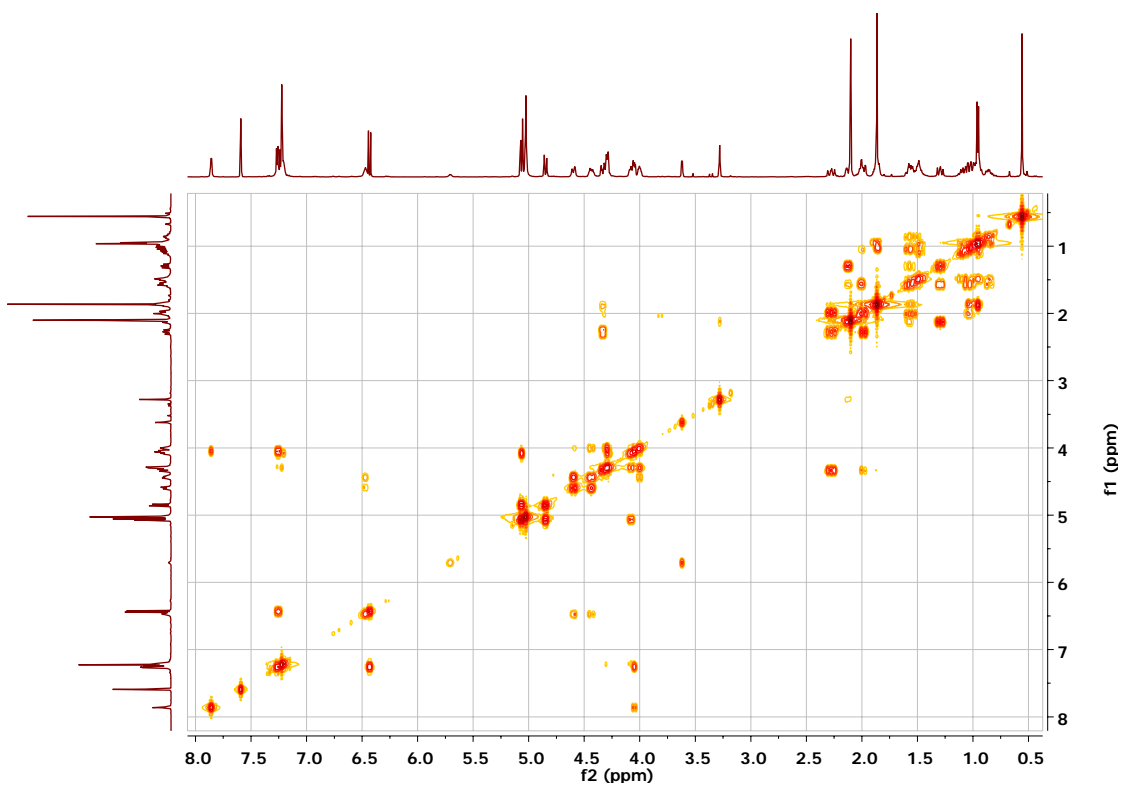

S15(d) HSQC spectrum of sitoindoside IX (15)

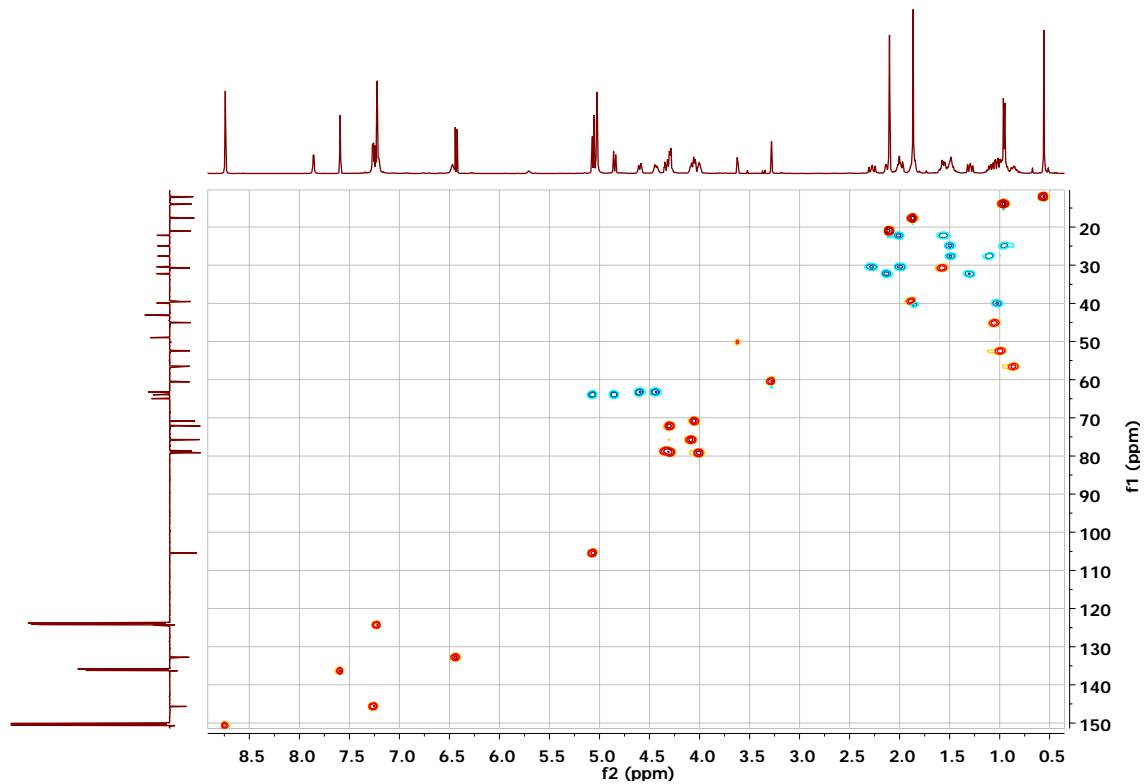

S15(e) HMBC spectrum of sitoindoside IX (15)

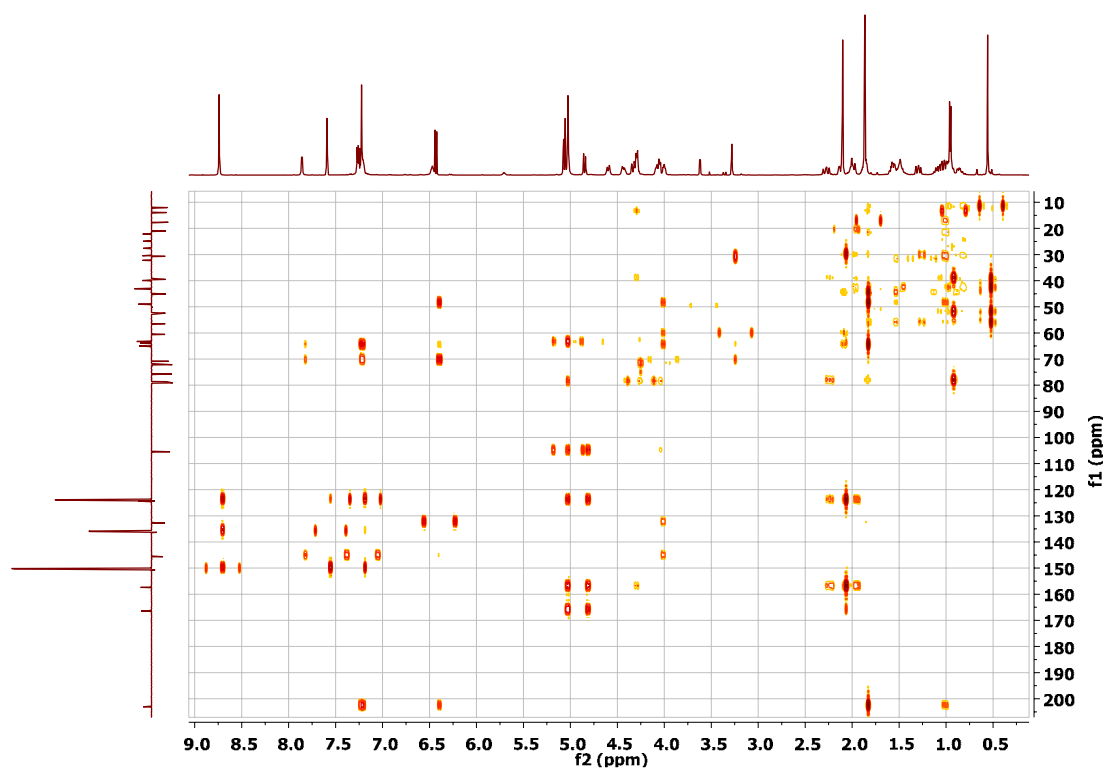

S15(f) NOESY spectrum of sitoindoside IX (15)

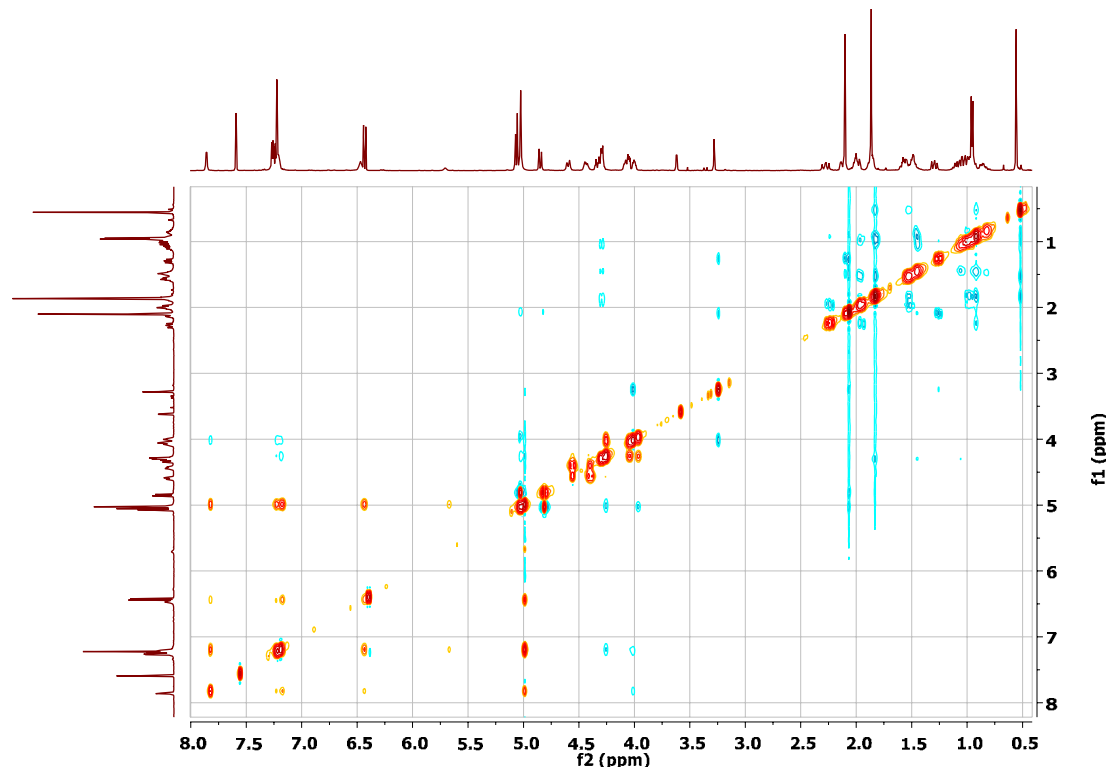

S16(a)  $^1\text{H}$  NMR spectrum of withaferin A (16) in  $\text{CDCl}_3$  (500 MHz)

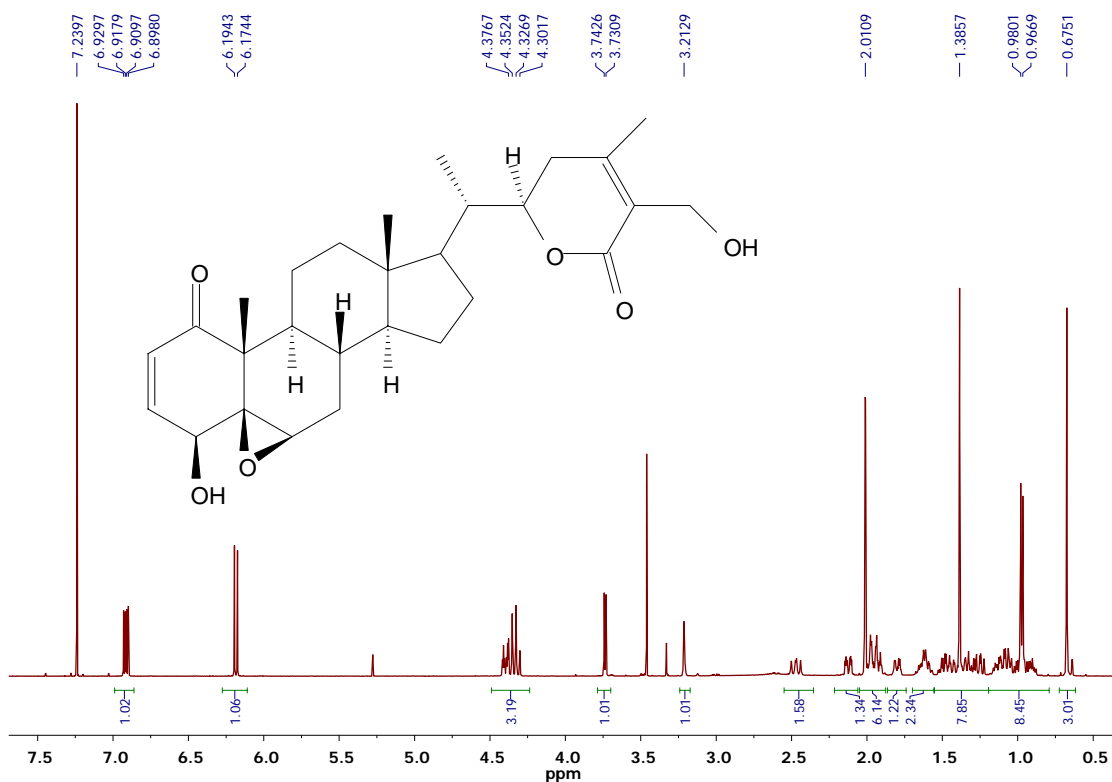

**S16(b)**  $^{13}\text{C}$  and DEPT135 spectra of withaferin A (**16**) (125 MHz)

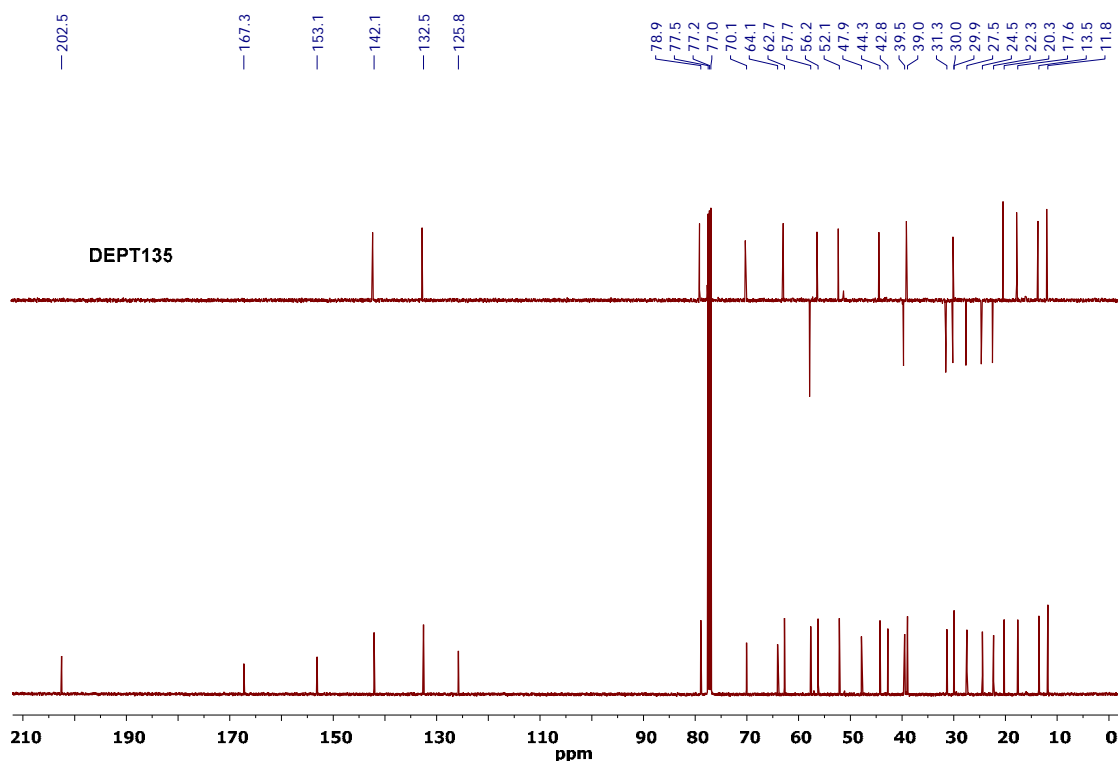

**S17(a)**  $^1\text{H}$  NMR spectrum of 2,3-dihydro-3 $\beta$ -methoxywithaferin A (**17**) in  $\text{CDCl}_3$  (500 MHz)

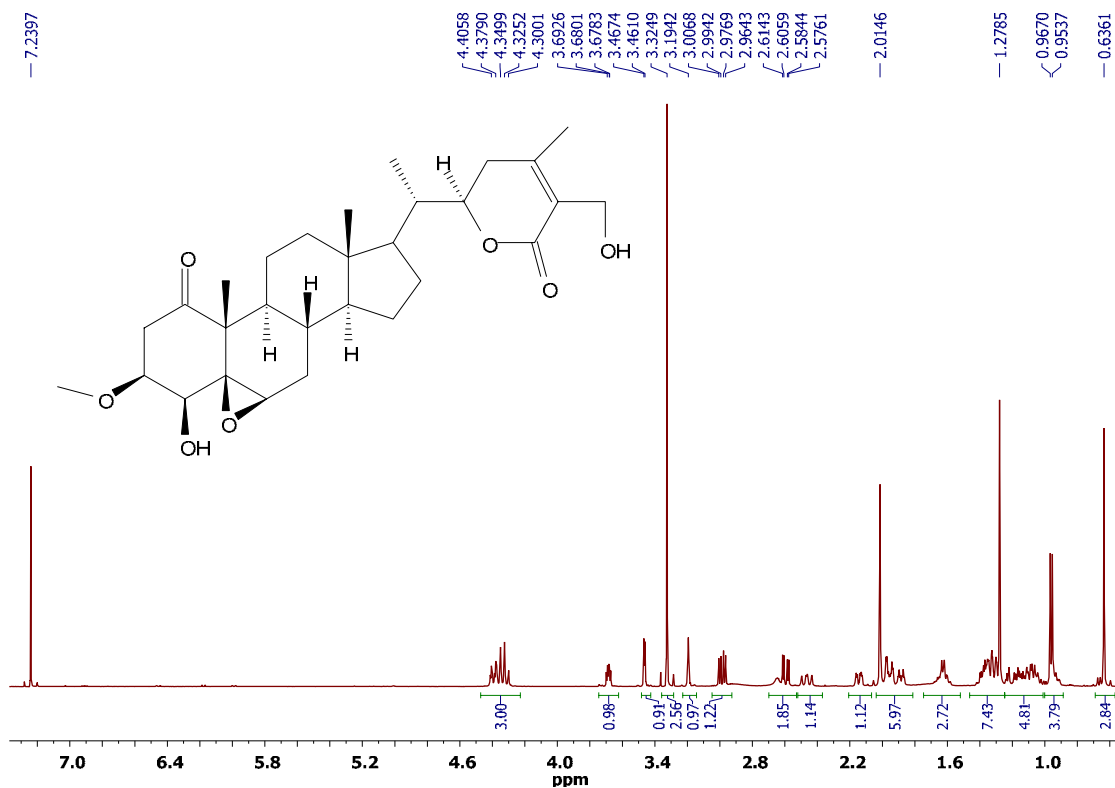

S17(b)  $^{13}\text{C}$  and DEPT135 spectra of 2,3-dihydro-3 $\beta$ -methoxywithaferin A (**17**) (125 MHz)

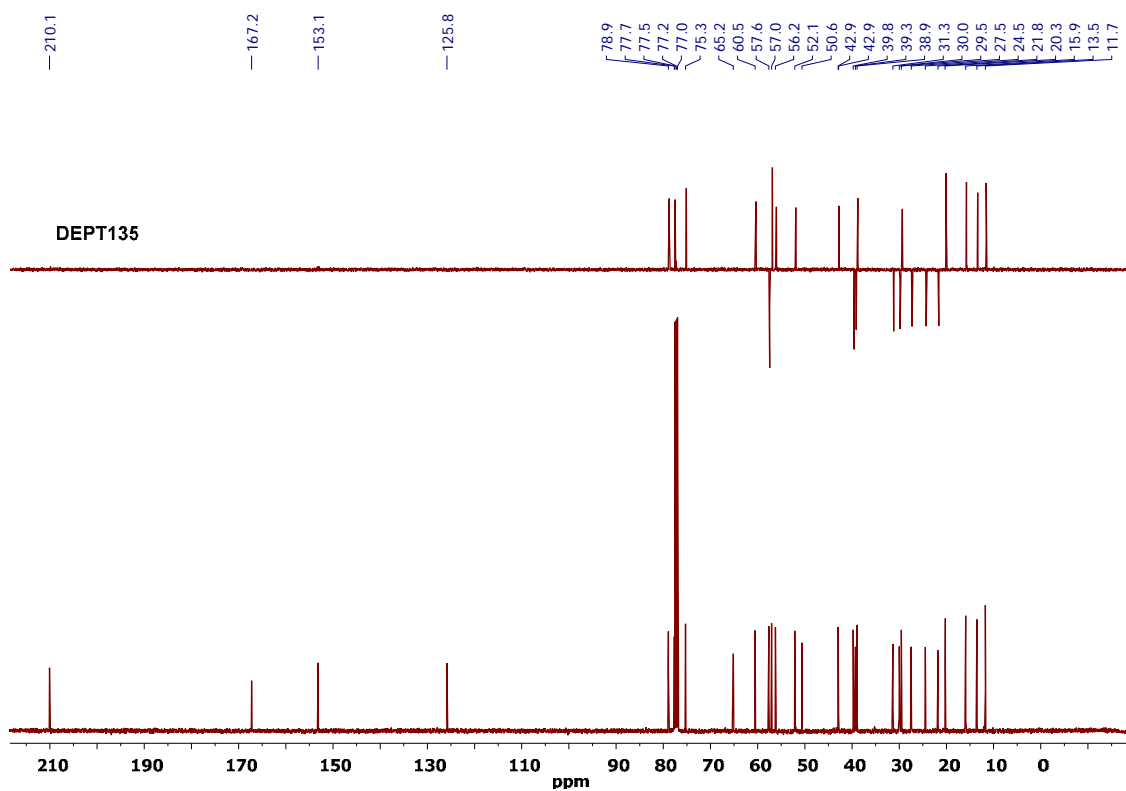

S17(c)  $^1\text{H}$ - $^1\text{H}$  COSY spectrum of 2,3-dihydro-3 $\beta$ -methoxywithaferin A (**17**)

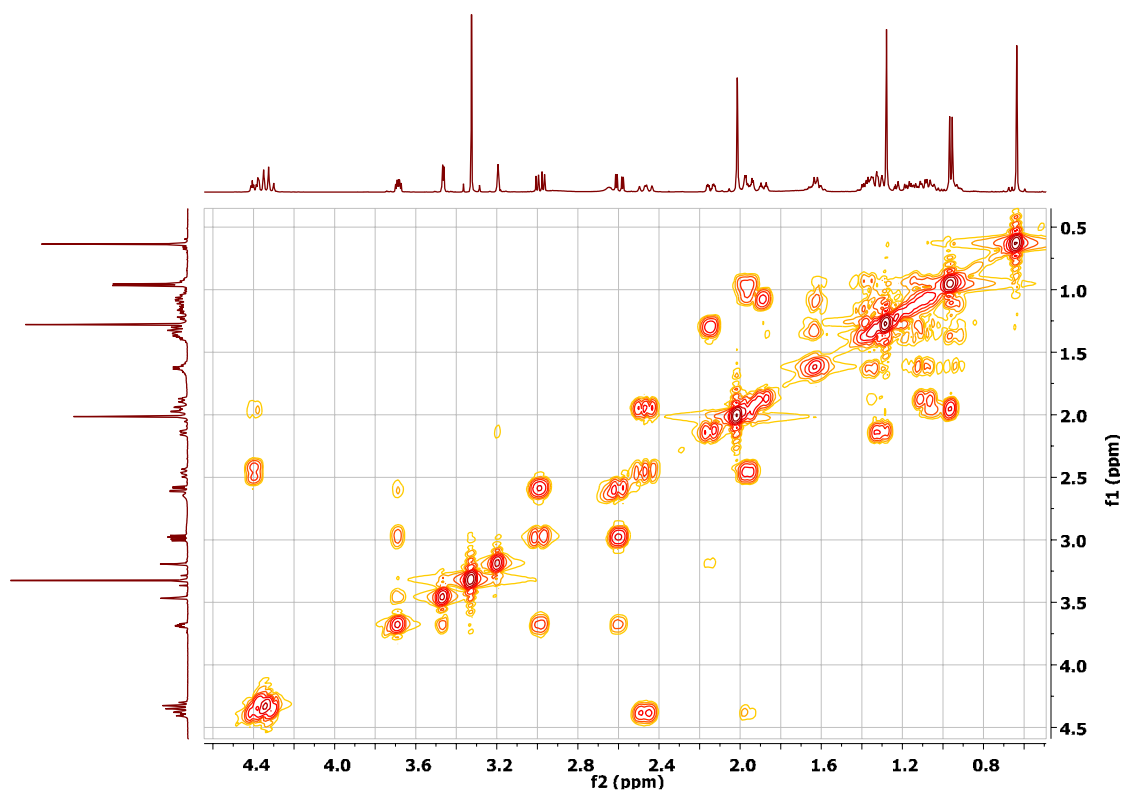

S17(d) HSQC spectrum of 2,3-dihydro-3 $\beta$ -methoxywithaferin A (17)

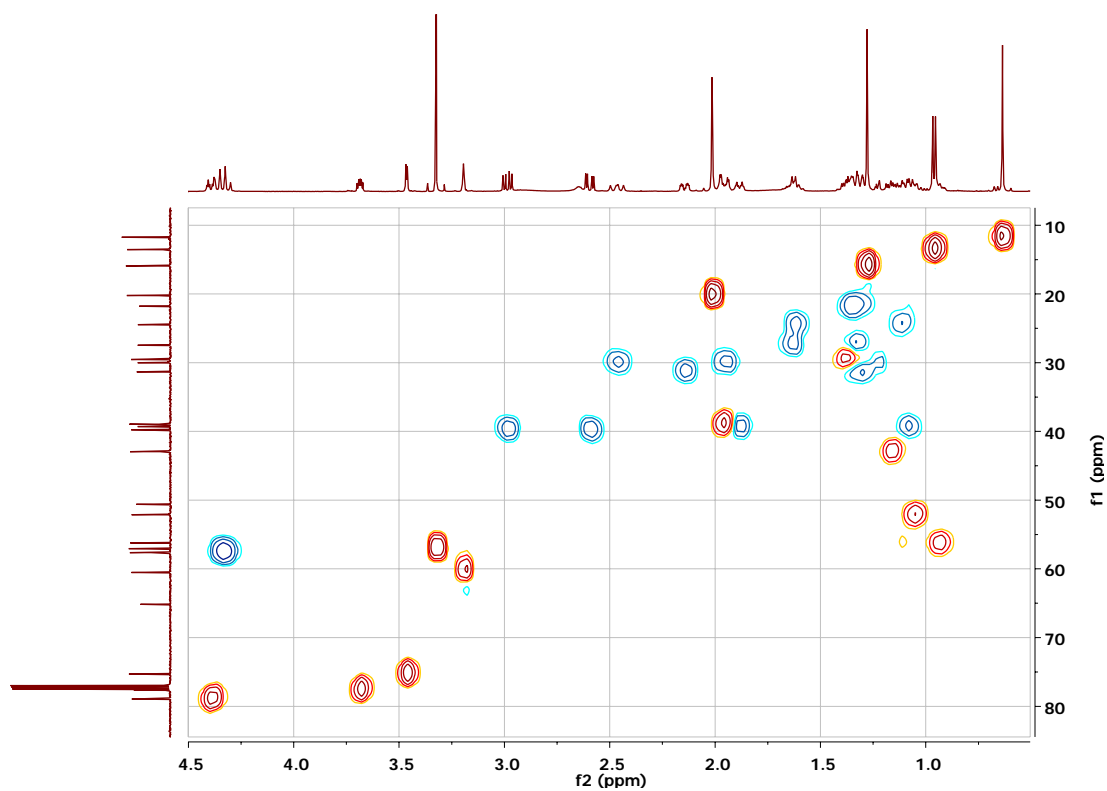

S17(e) HMBC spectrum of 2,3-dihydro-3 $\beta$ -methoxywithaferin A (17)

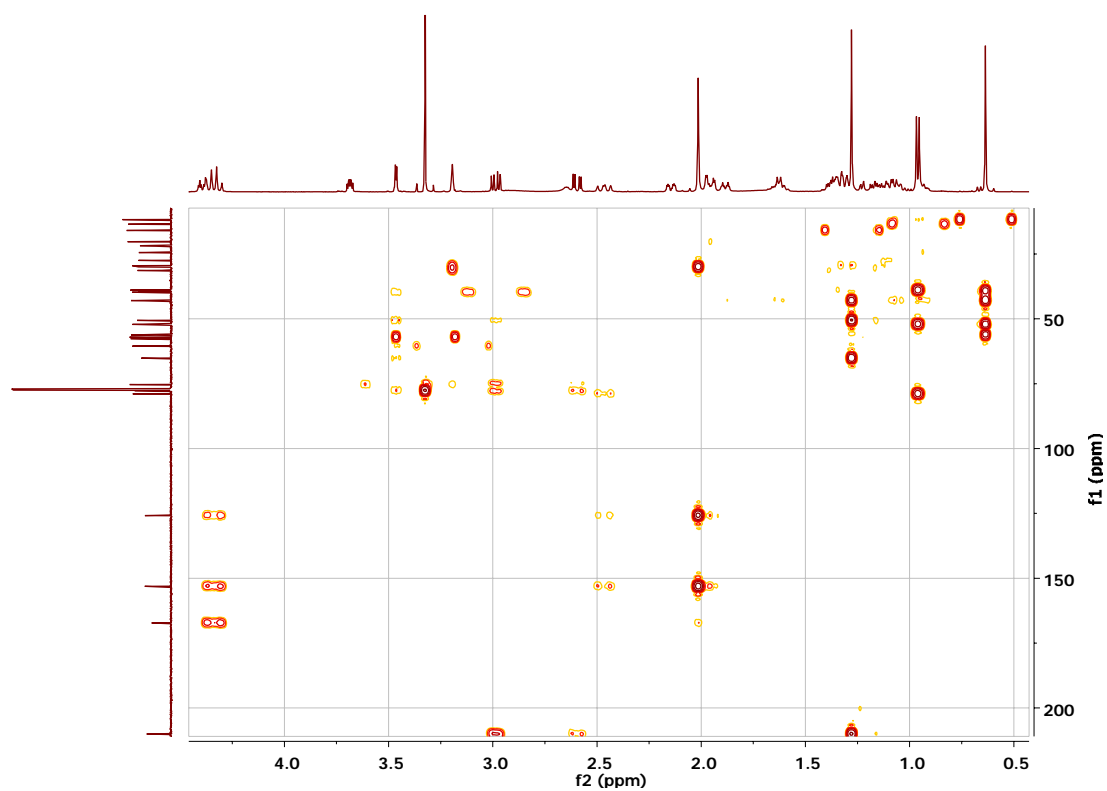

S17(f) NOESY spectrum of 2,3-dihydro-3 $\beta$ -methoxywithaferin A (**17**)

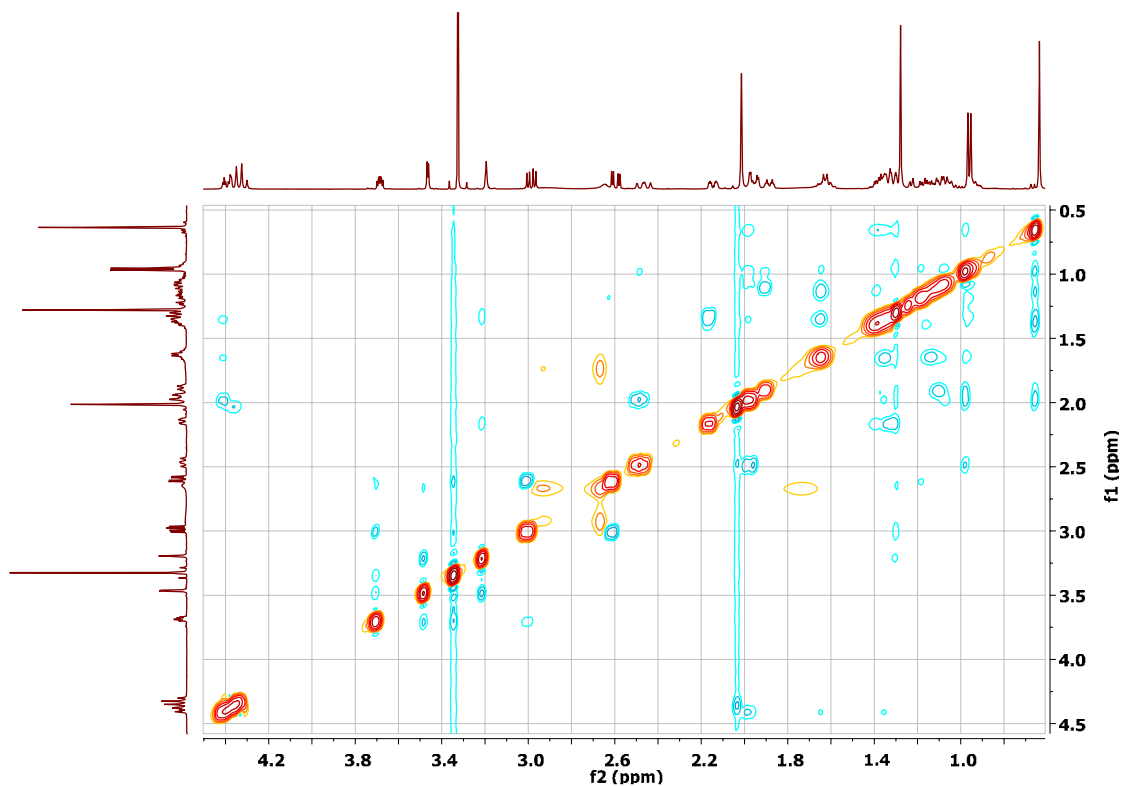

S18(a)  $^1\text{H}$  NMR spectrum of viscosalactone B (**18**) in  $\text{C}_5\text{D}_5\text{N}$  (500 MHz)

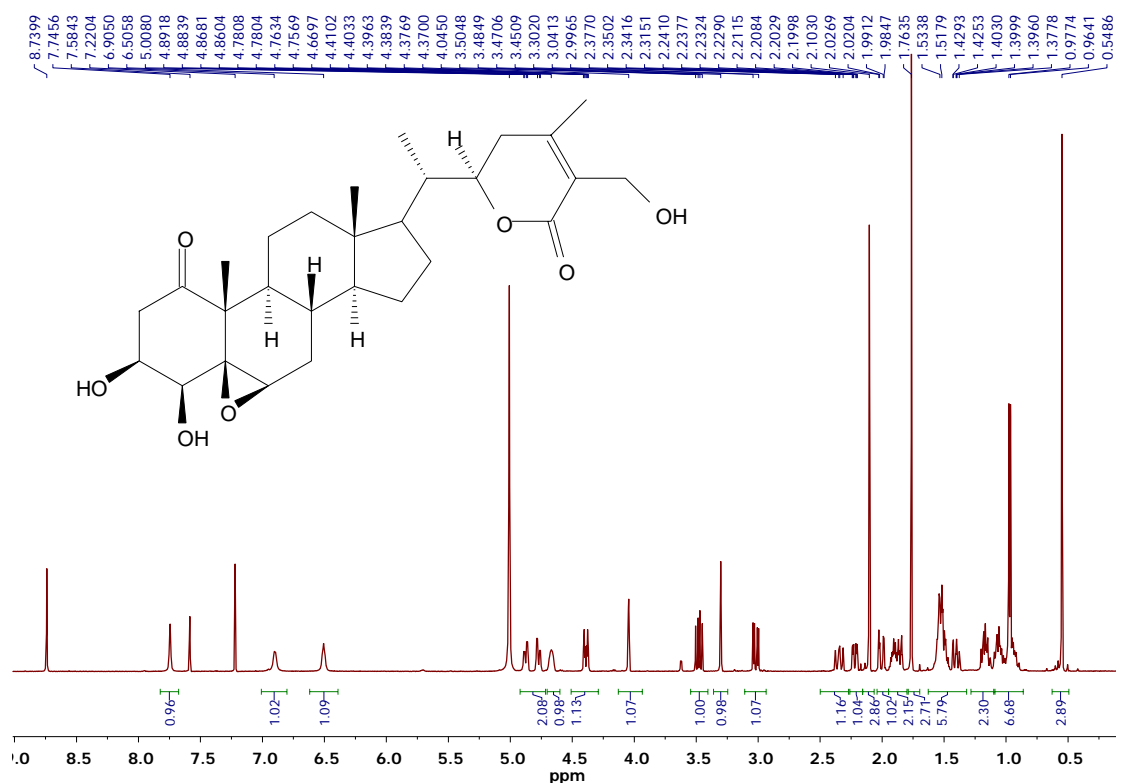

S18(b)  $^{13}\text{C}$  APT spectrum of viscosalactone B (**18**) (125 MHz)

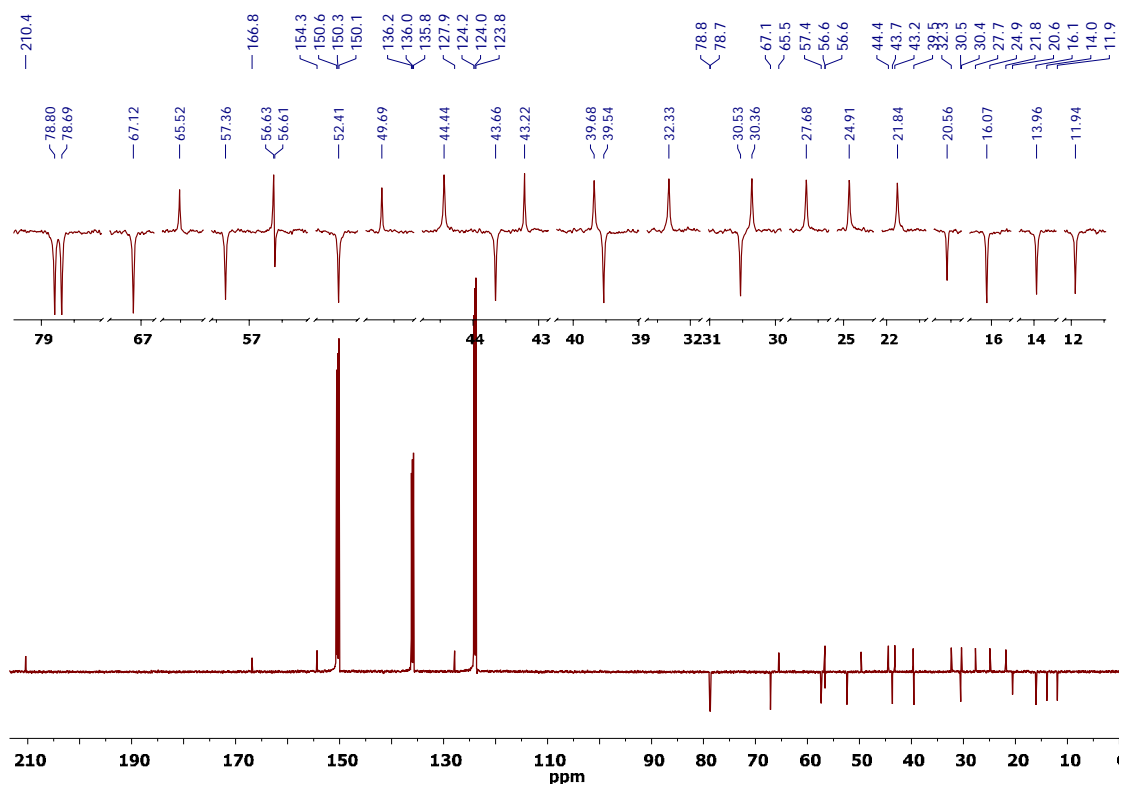

S18(c)  $^1\text{H}$ - $^1\text{H}$  COSY spectrum of viscosalactone B (**18**)

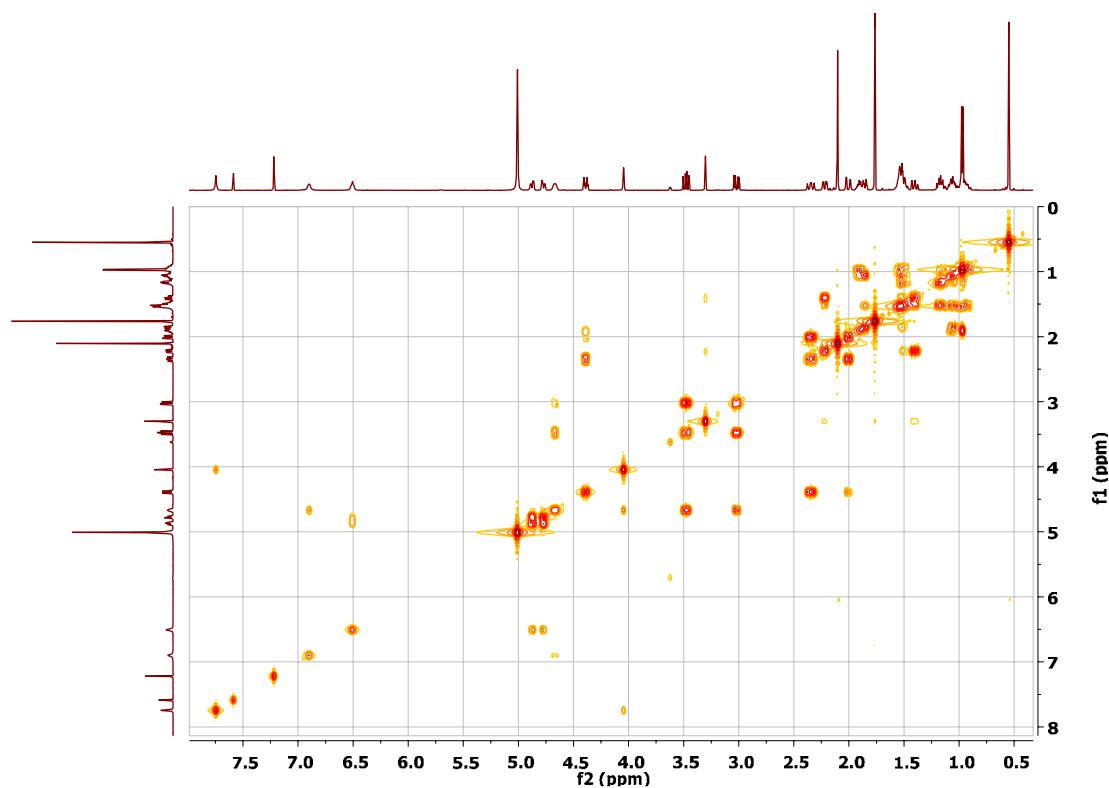



S18(d) HSQC spectrum of viscosalactone B (18)

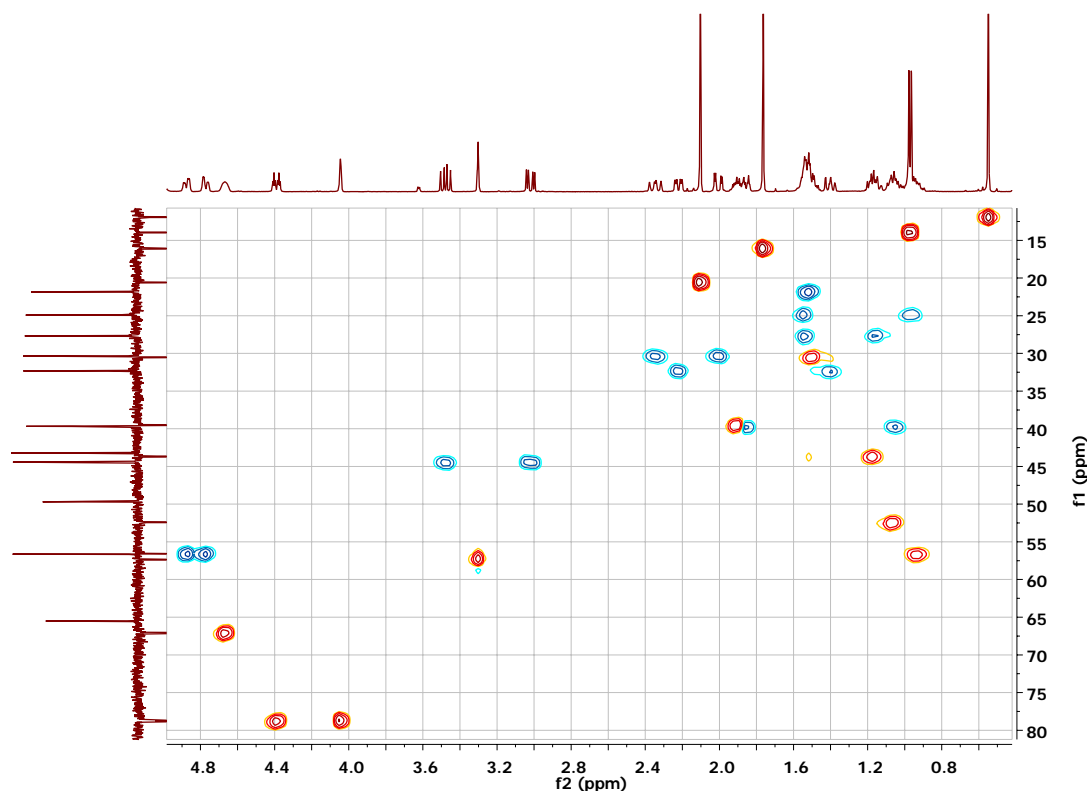

S18(e) HMBC spectrum of viscosalactone B (18)

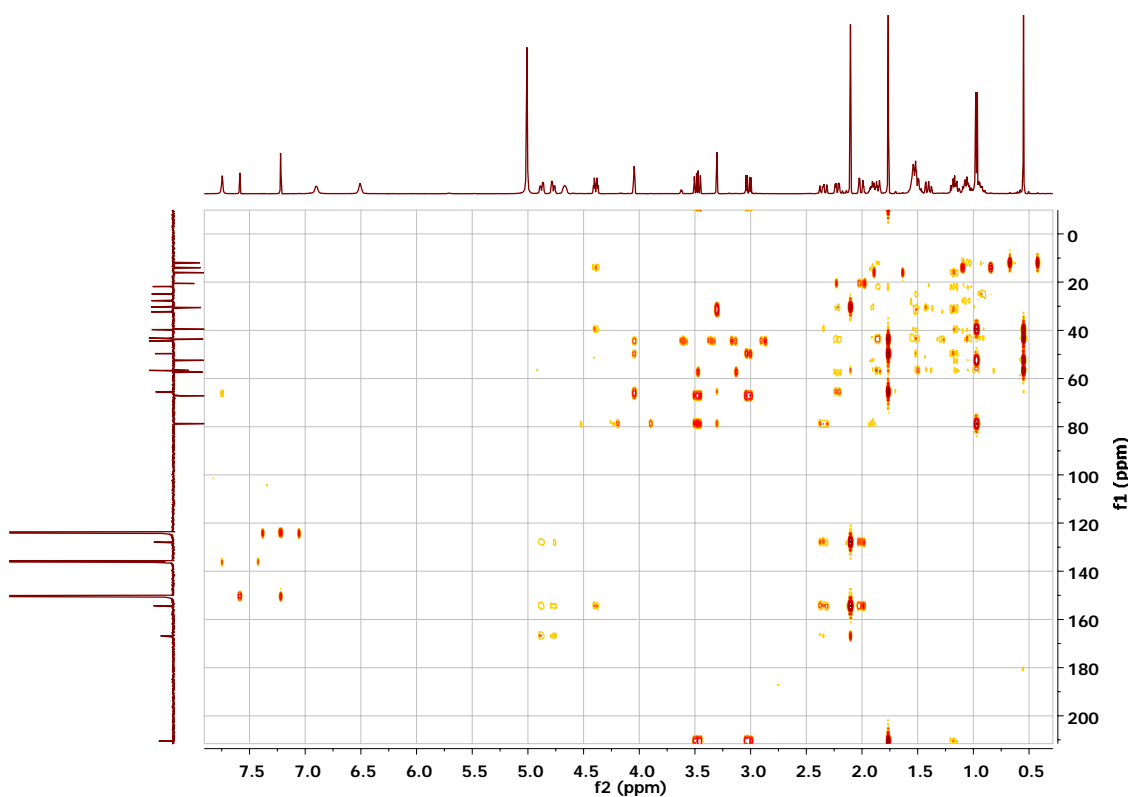

S18(f) NOESY spectrum of viscosalactone B (18)

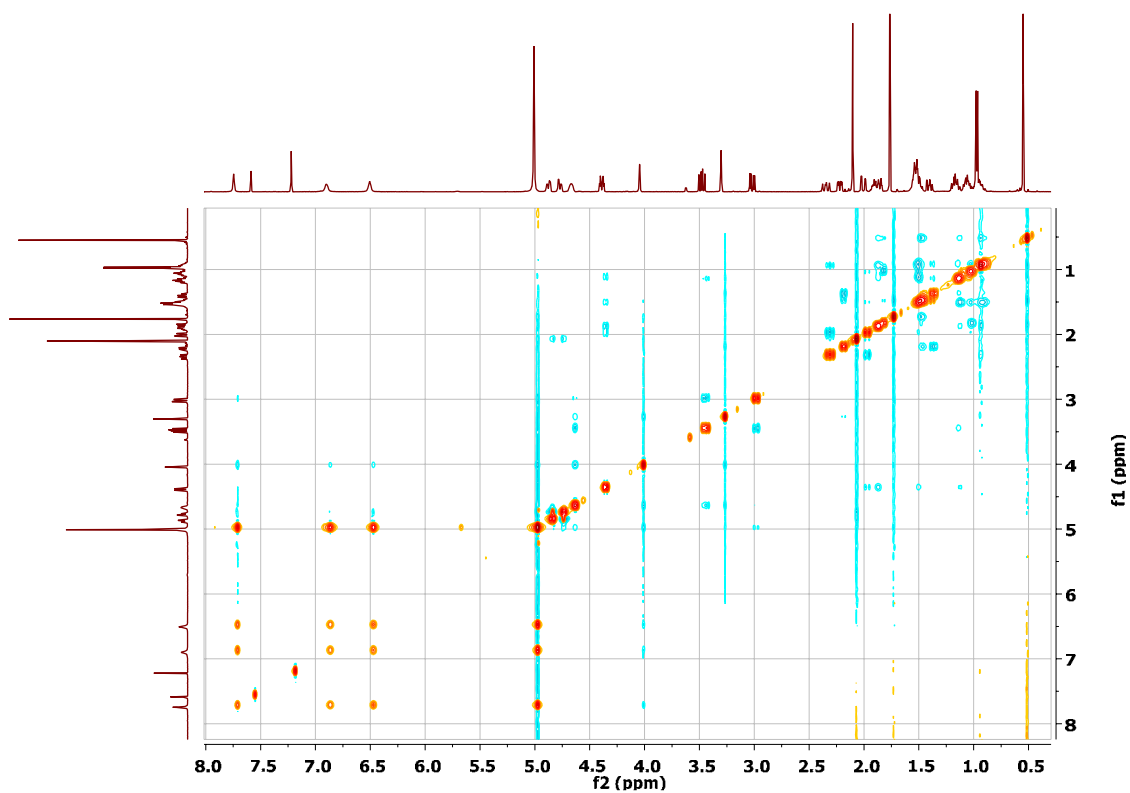

S19(a)  $^1\text{H}$  NMR spectrum of 2,3-dihydro-3 $\beta$ -O-sulfate withaferin A (19) in  $\text{C}_5\text{D}_5\text{N}$  (500 MHz)

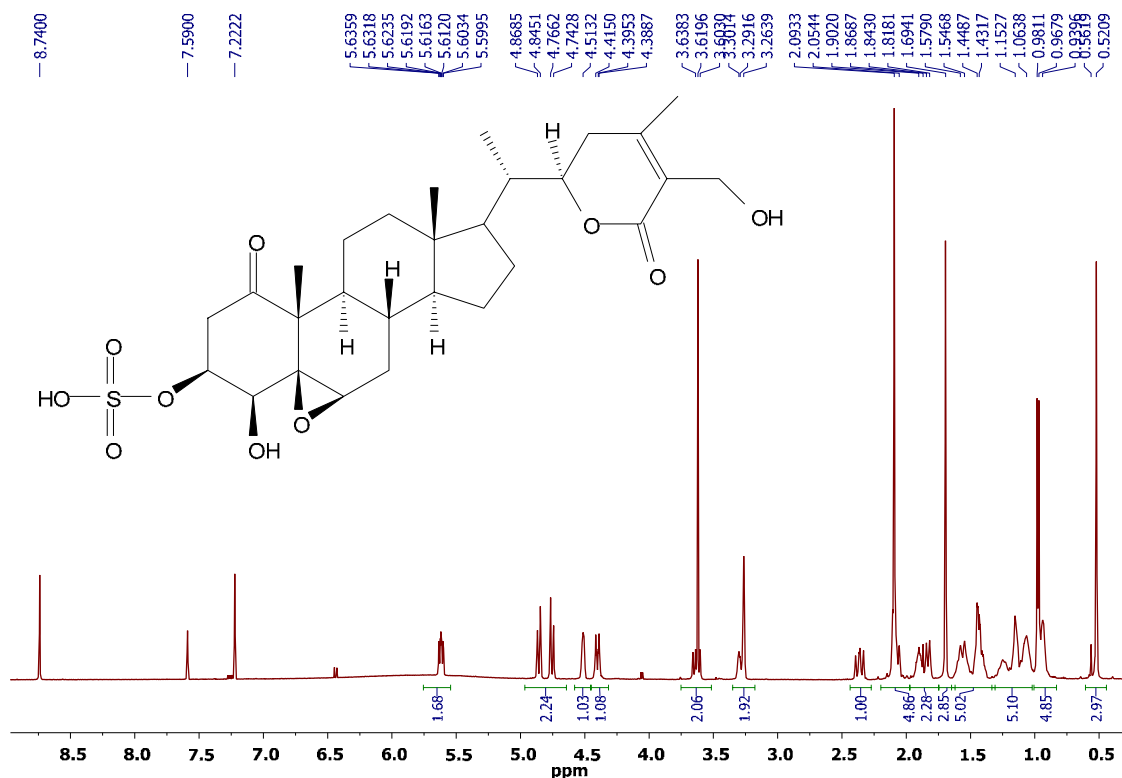

S19(b)  $^{13}\text{C}$  APT spectrum of 2,3-dihydro-3 $\beta$ -O-sulfate withaferin A (**19**) (125 MHz)

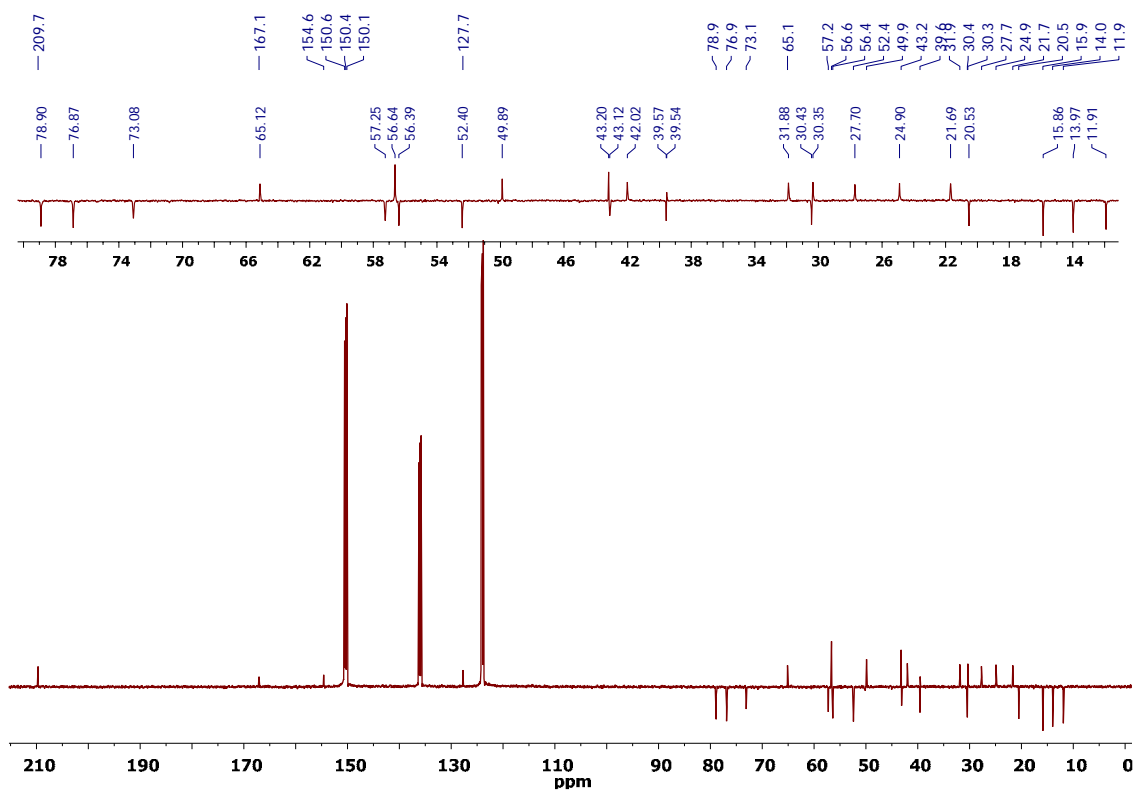

S19(c)  $^1\text{H}$ - $^1\text{H}$  COSY spectrum of 2,3-dihydro-3 $\beta$ -O-sulfate withaferin A (**19**)

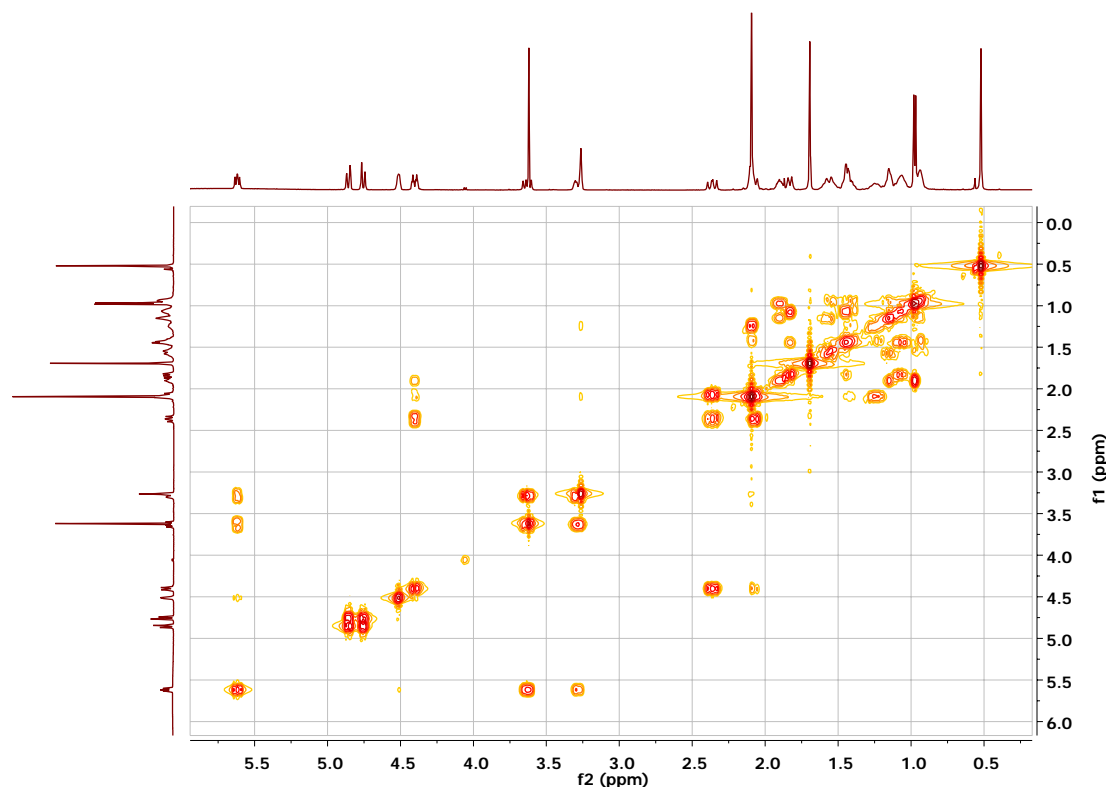

S19(d) HSQC spectrum of 2,3-dihydro-3 $\beta$ -O-sulfate withaferin A (**19**)

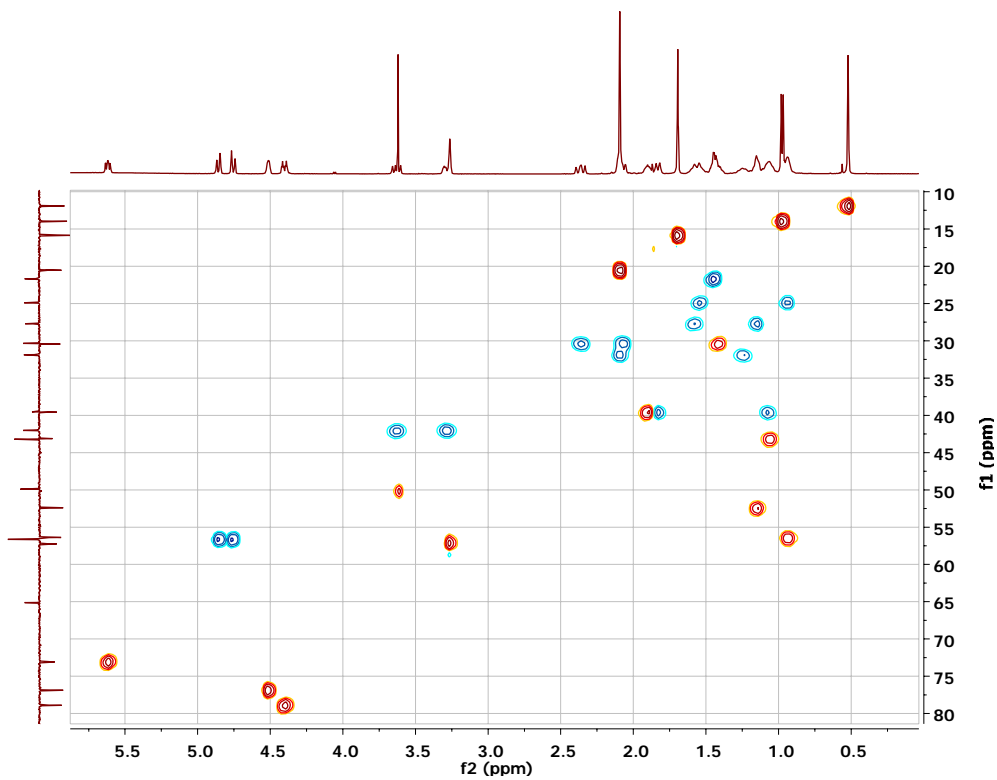

S19(e) HMBC spectrum of 2,3-dihydro-3 $\beta$ -O-sulfate withaferin A (**19**)

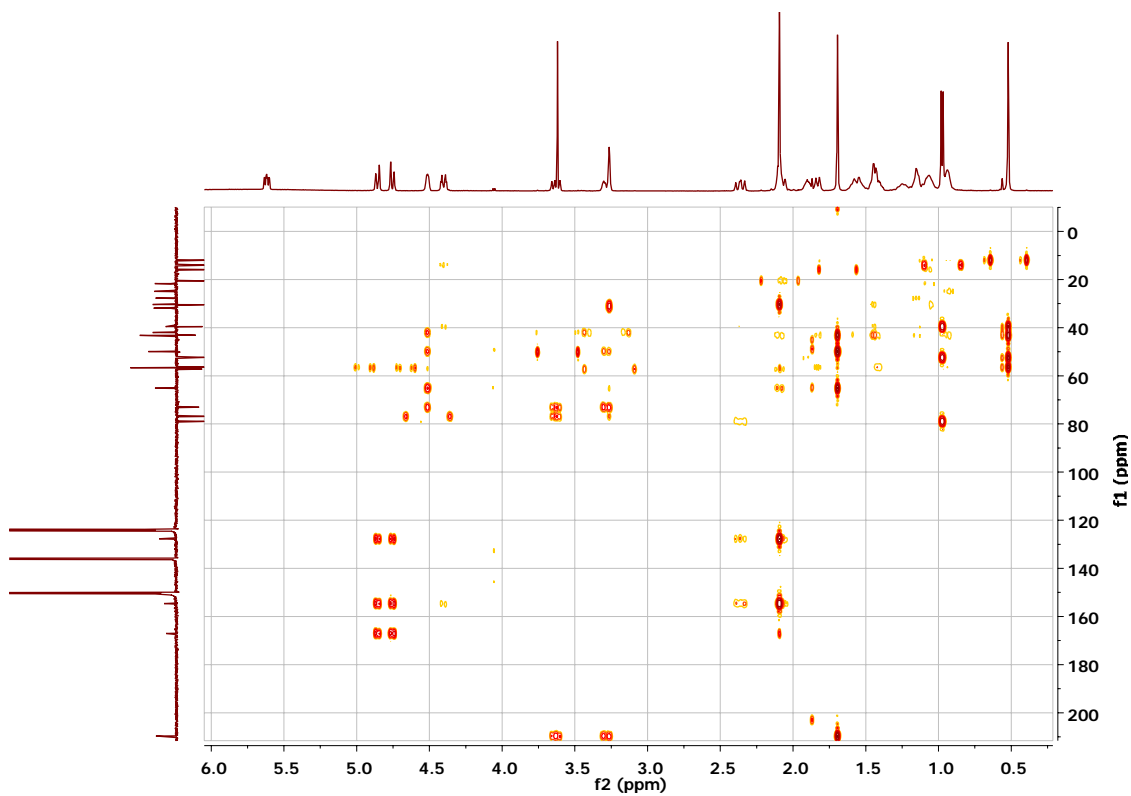

S19(f) NOESY spectrum of 2,3-dihydro-3 $\beta$ -O-sulfate withaferin A (**19**)

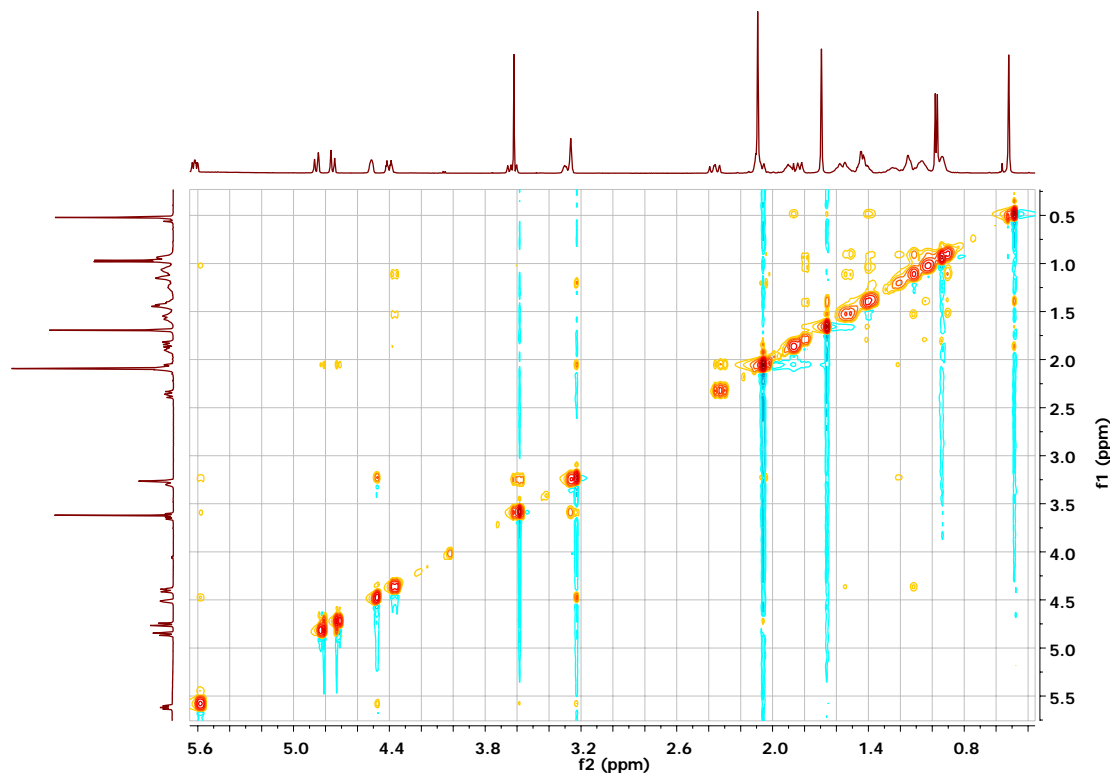

S20  $^1\text{H}$  NMR spectrum of 2,3-dihydrowithaferin A (**20**) in  $\text{CDCl}_3$  (400 MHz)

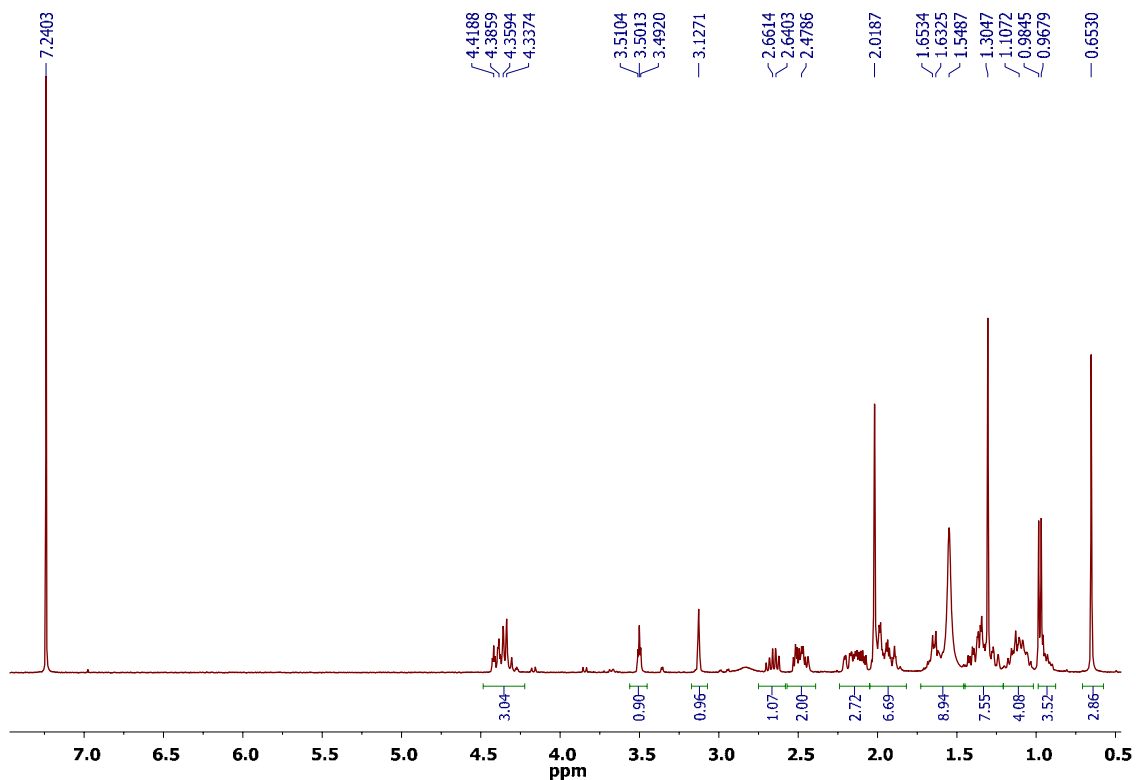

**S21(a)**  $^1\text{H}$  NMR spectrum of **21** in  $\text{C}_5\text{D}_5\text{N}$  (500 MHz)

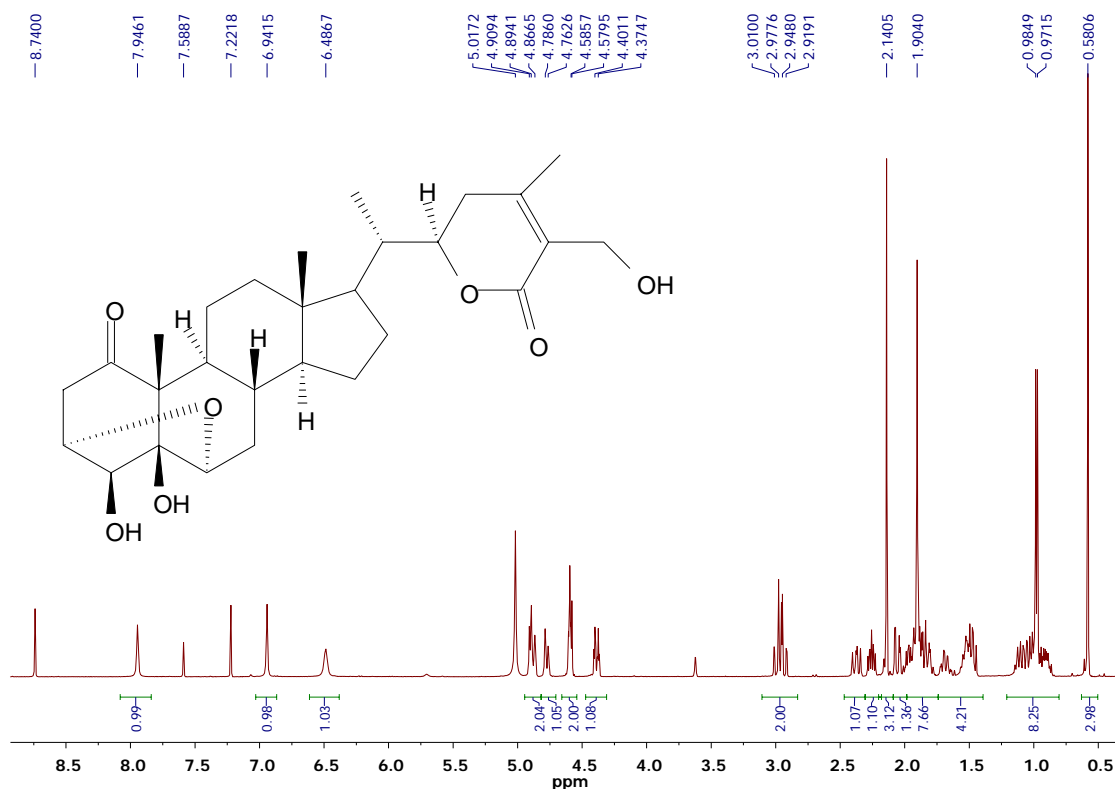

**S21(b)**  $^{13}\text{C}$  APT spectrum of **21** (125 MHz)

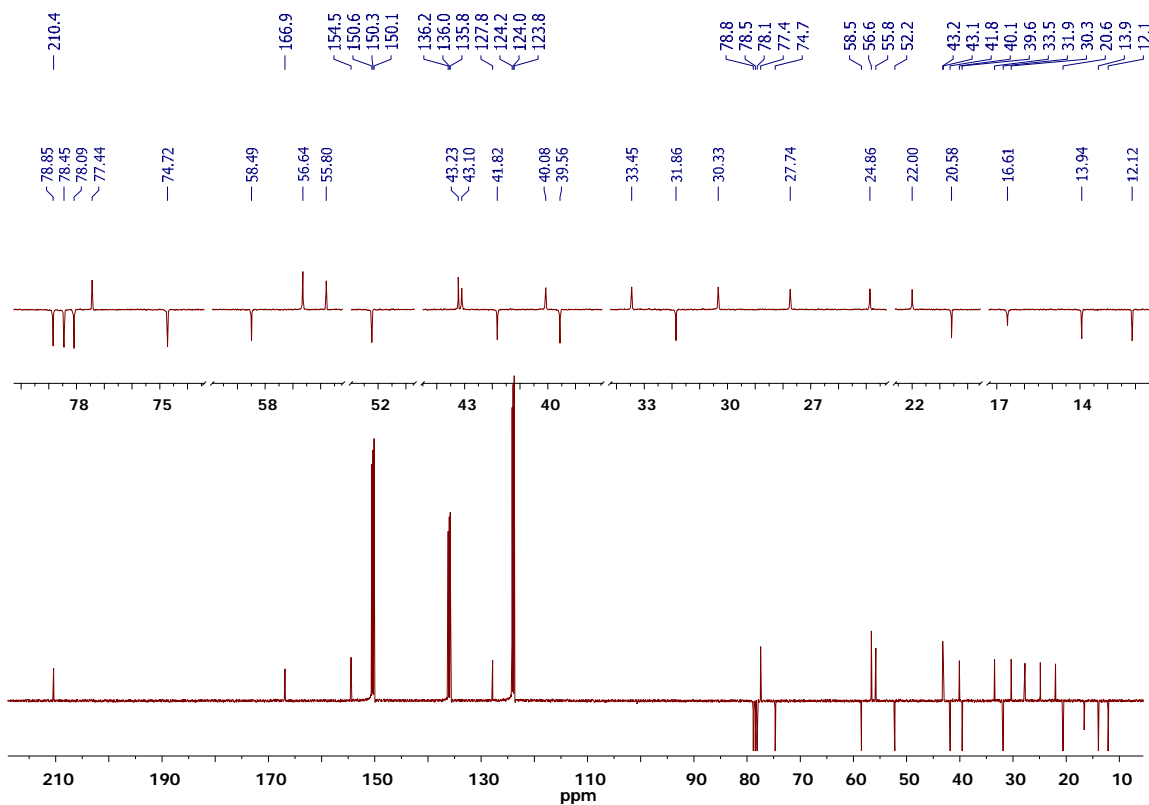

S21(c)  $^1\text{H}$ - $^1\text{H}$  COSY spectrum of **21**

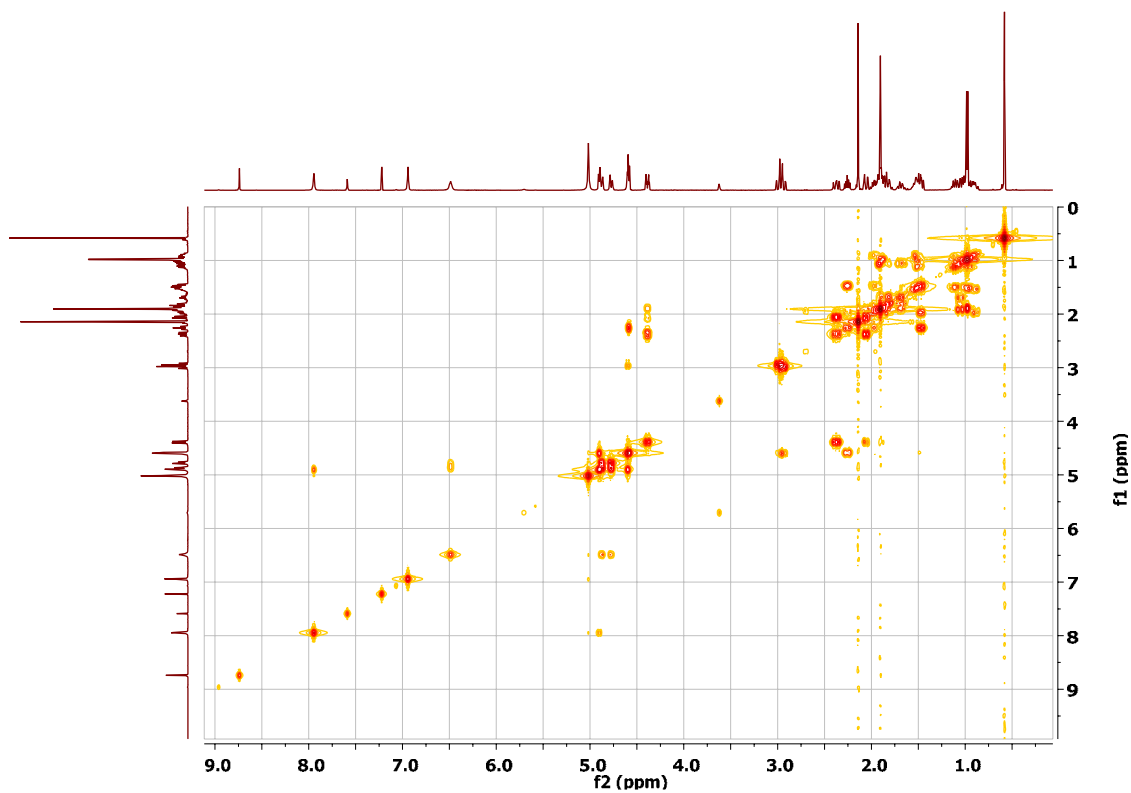

S21(d) HSQC spectrum of **21**

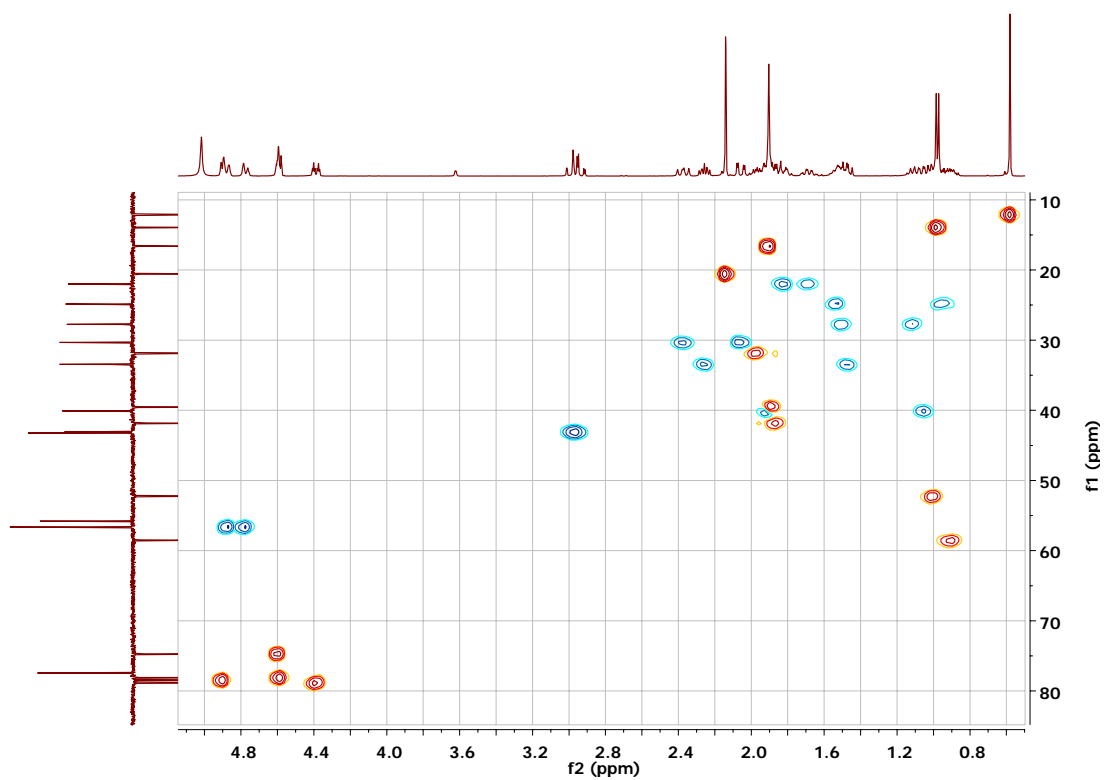

S21(e) HMBC spectrum of **21**

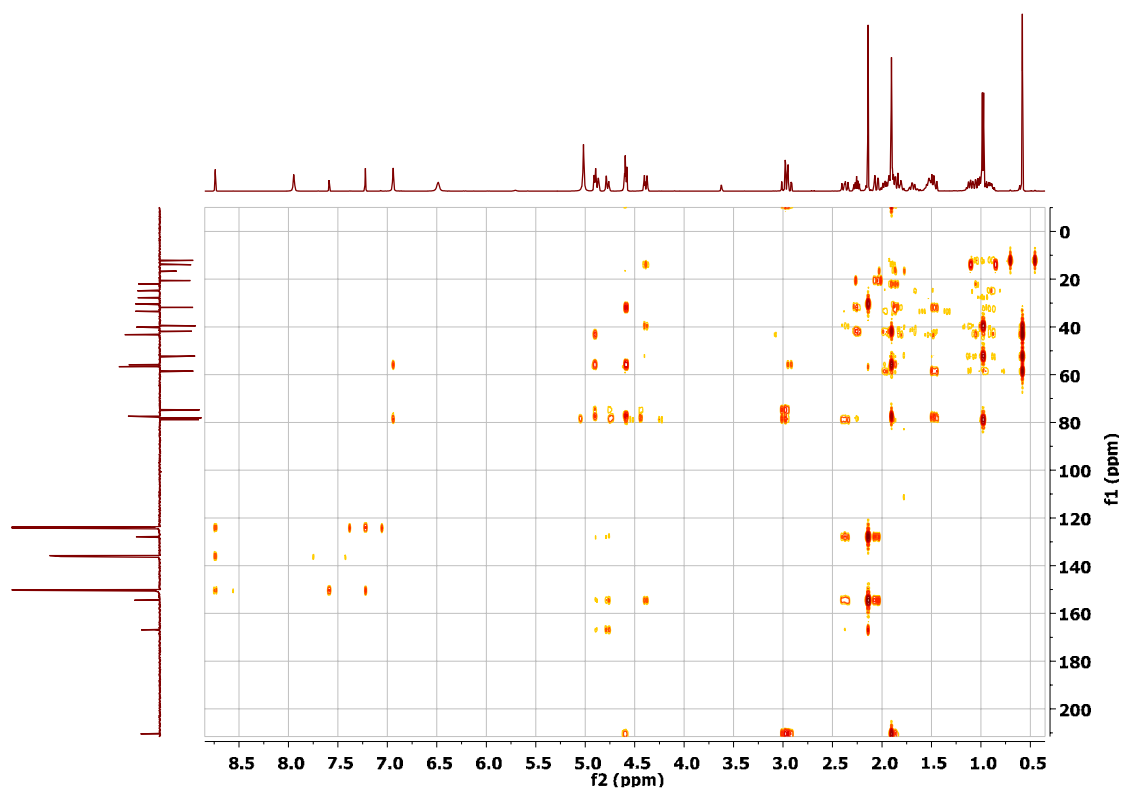

S21(f) NOESY spectrum of **21**

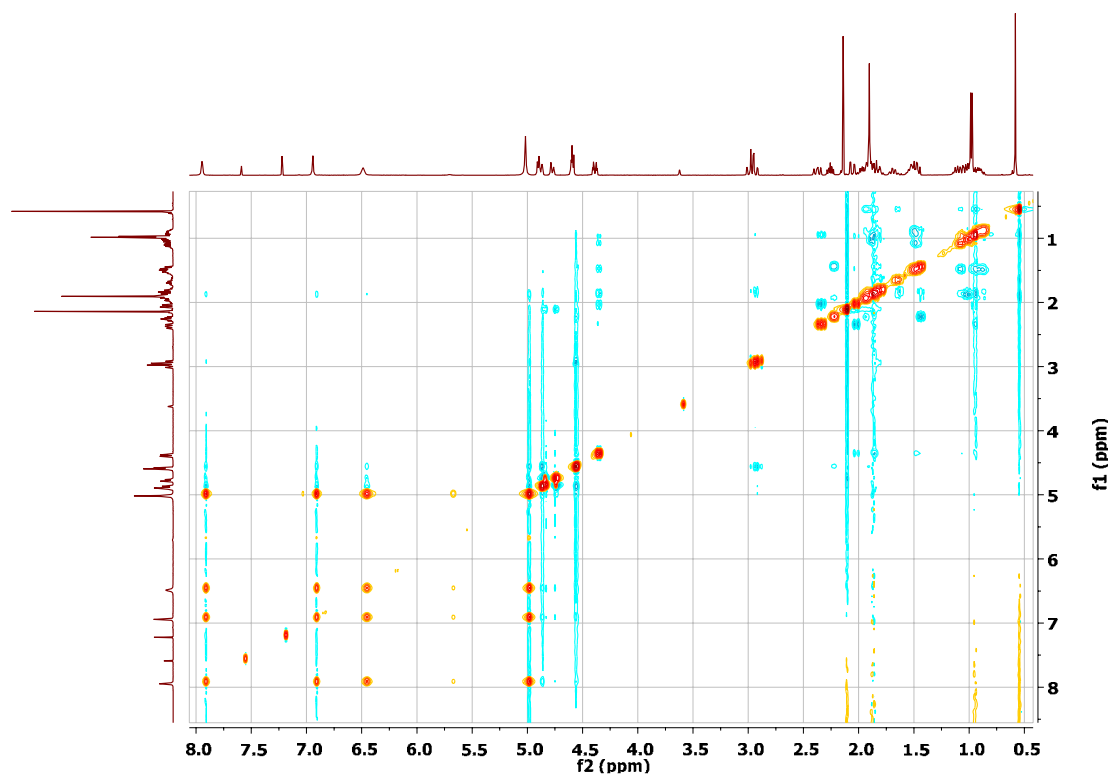



## S22 Cytotoxicity IC<sub>50</sub> of Fractions ( $\mu\text{g/mL}$ ) against Five Cell Lines <sup>a</sup>

| Fractions                                           | B16F10 | SKMEL-28 | JMAR | MDA-1986 | MRC-5 |
|-----------------------------------------------------|--------|----------|------|----------|-------|
| CH <sub>2</sub> Cl <sub>2</sub> :MeOH (1:1) Extract | 9.8    | 9.7      | 8.6  | 4.6      | 8.7   |
| Hexane Fraction                                     | 46.6   | 43.6     | 49.7 | 9.9      | 28.6  |
| EtOAc Fraction                                      | 1.6    | 1.7      | 1.5  | 0.7      | 1.0   |
| <i>n</i> -BuOH Fraction                             | 5.7    | 4.1      | 4.5  | 1.2      | 1.2   |

<sup>a</sup> For cell lines used, see text.
